# Supplementary material for: Feedback circuits are numerous in embryonic gene regulatory networks and offer a stabilizing influence on evolution of those networks
Source: PubMed Central journal article supplement (PMC10273620; doi:10.1186/s13227-023-00214-y), 2023-06-16

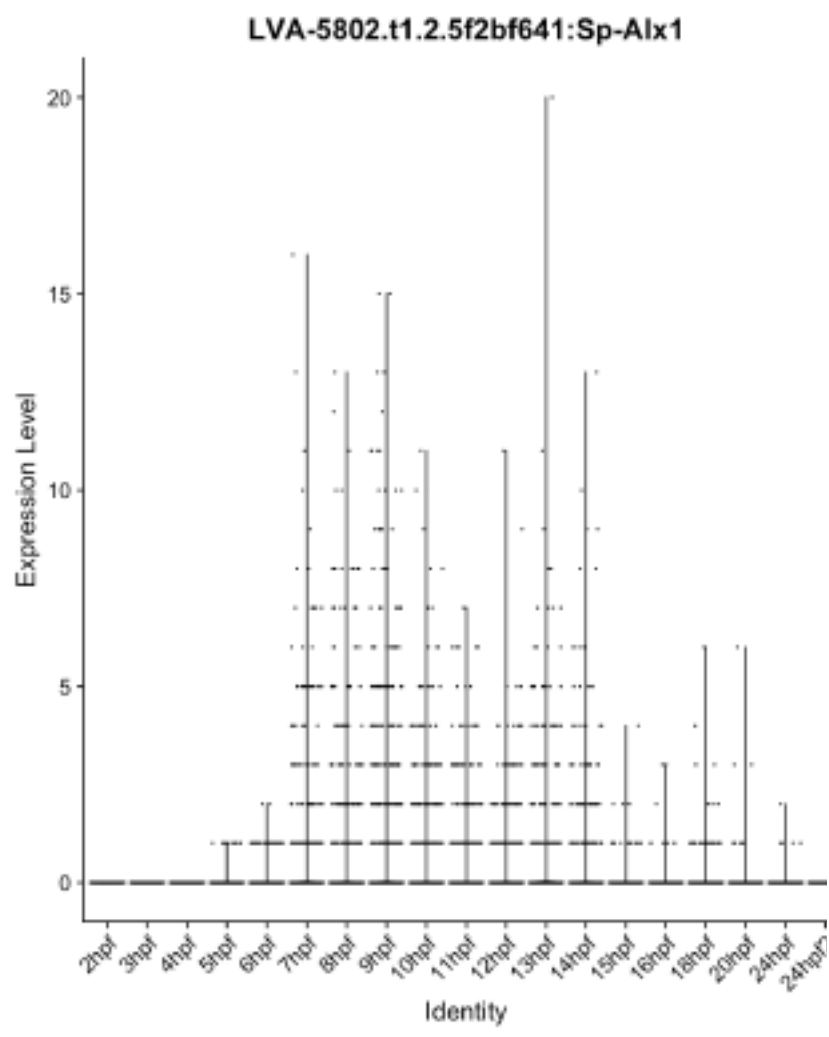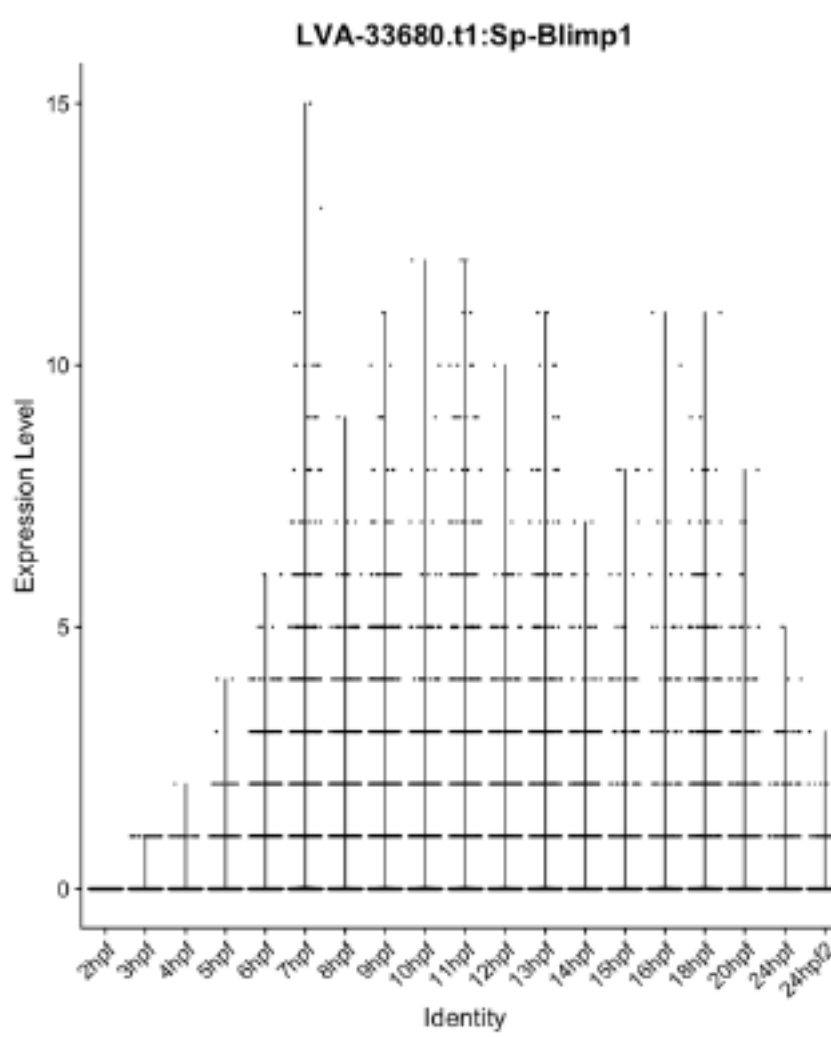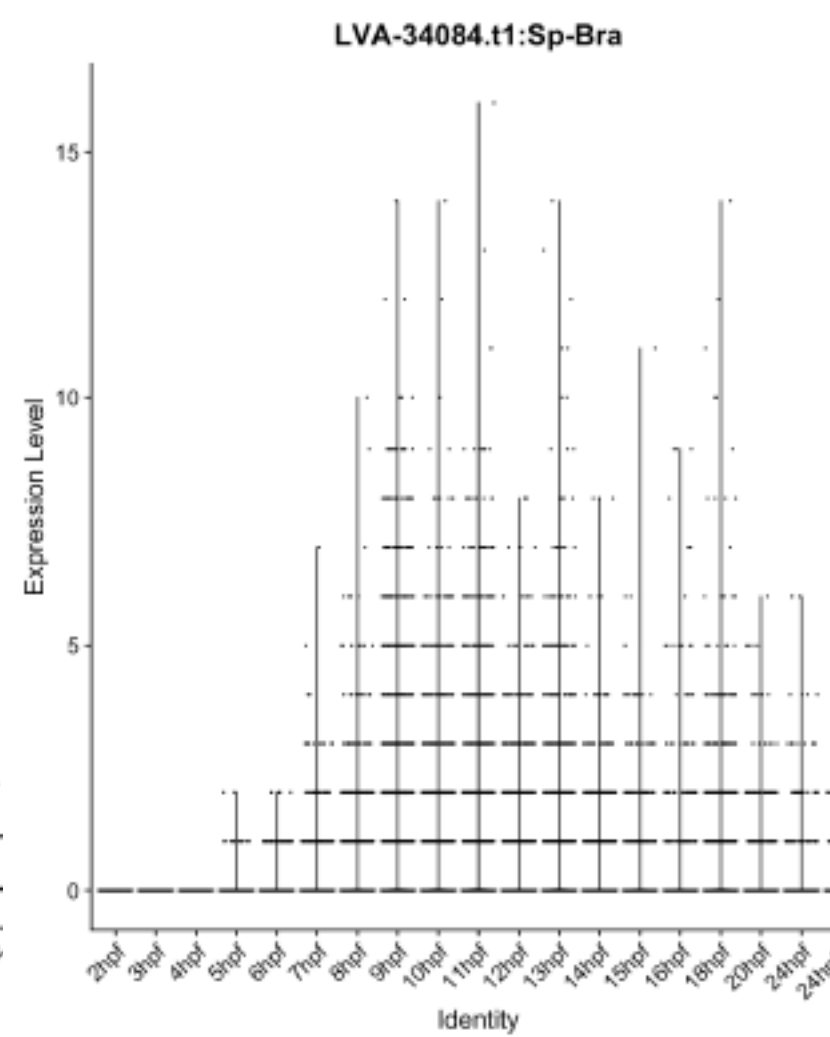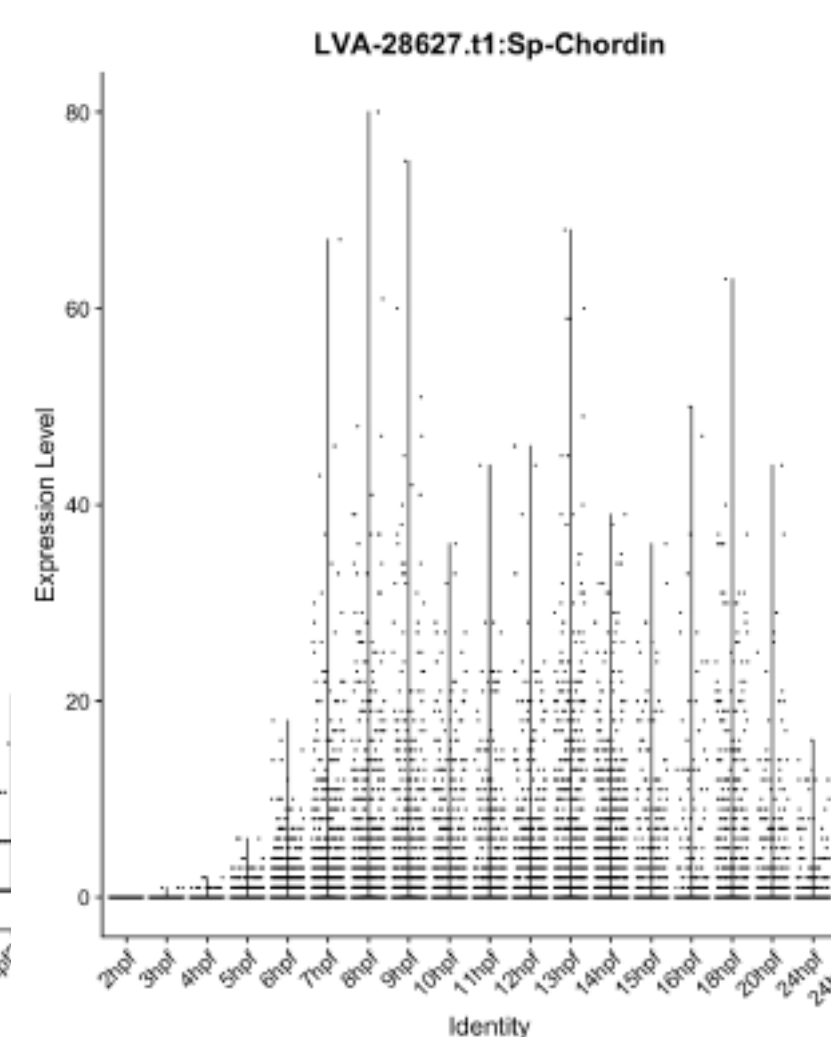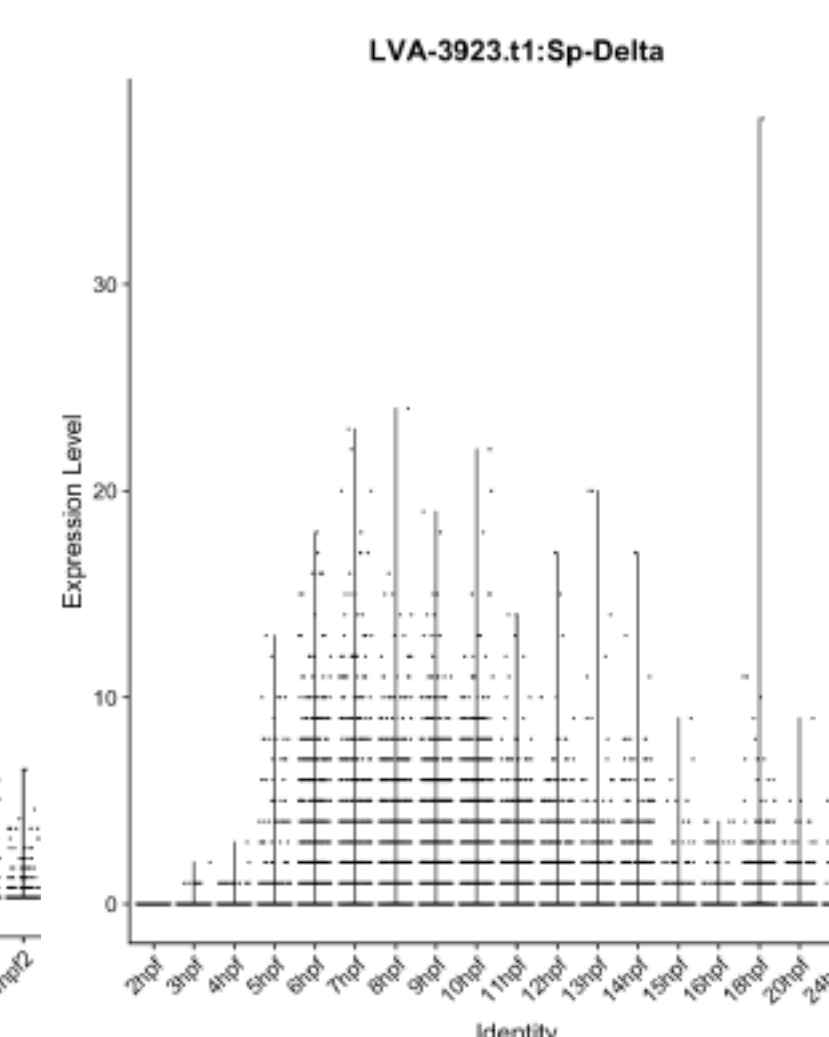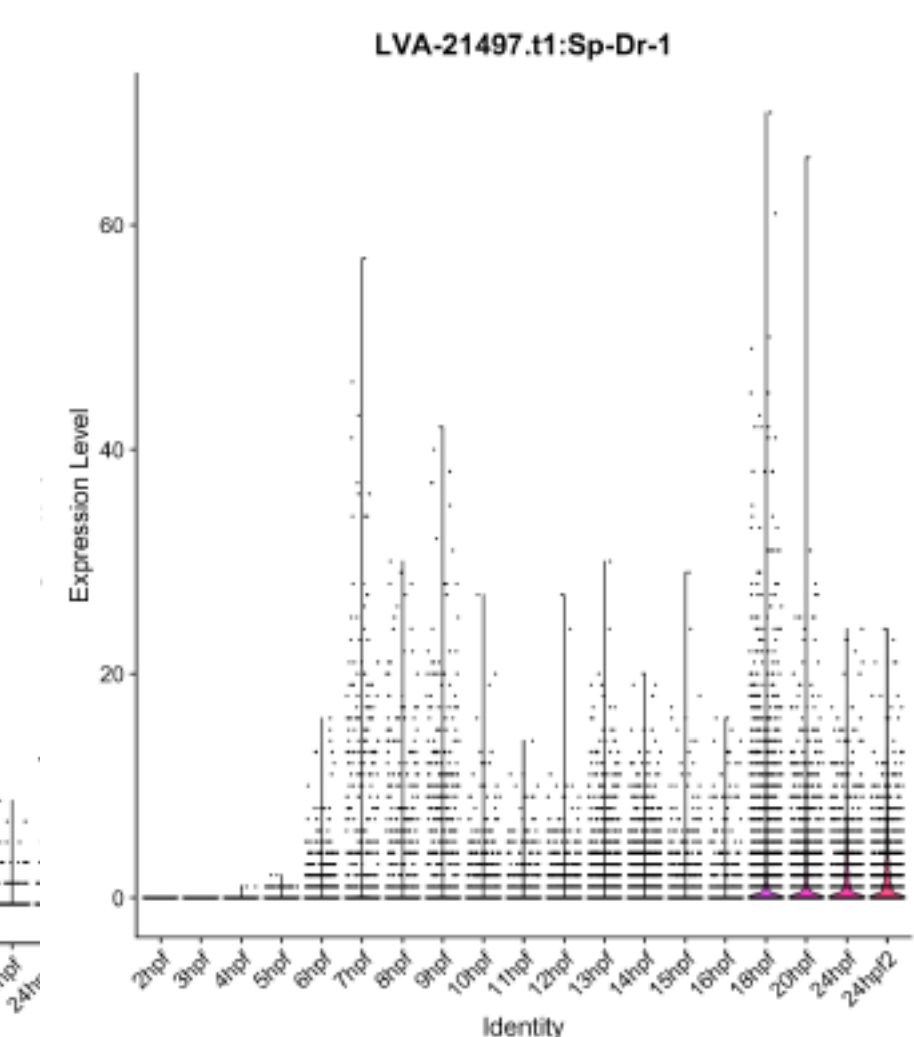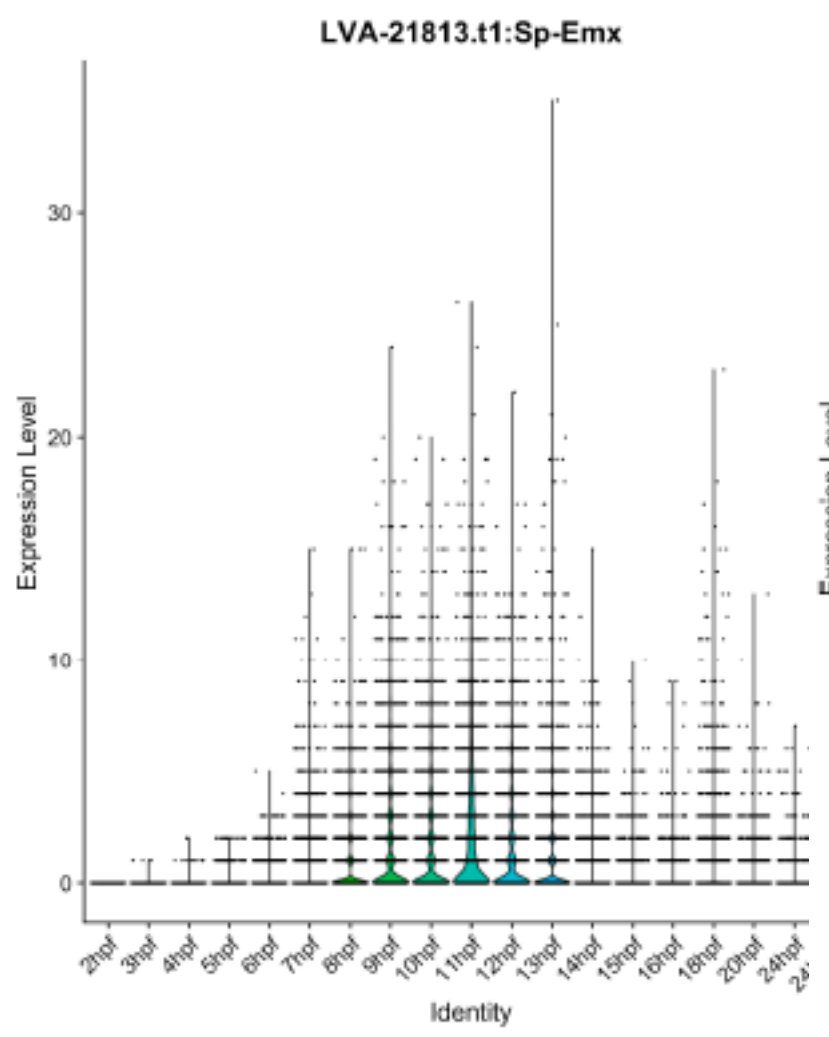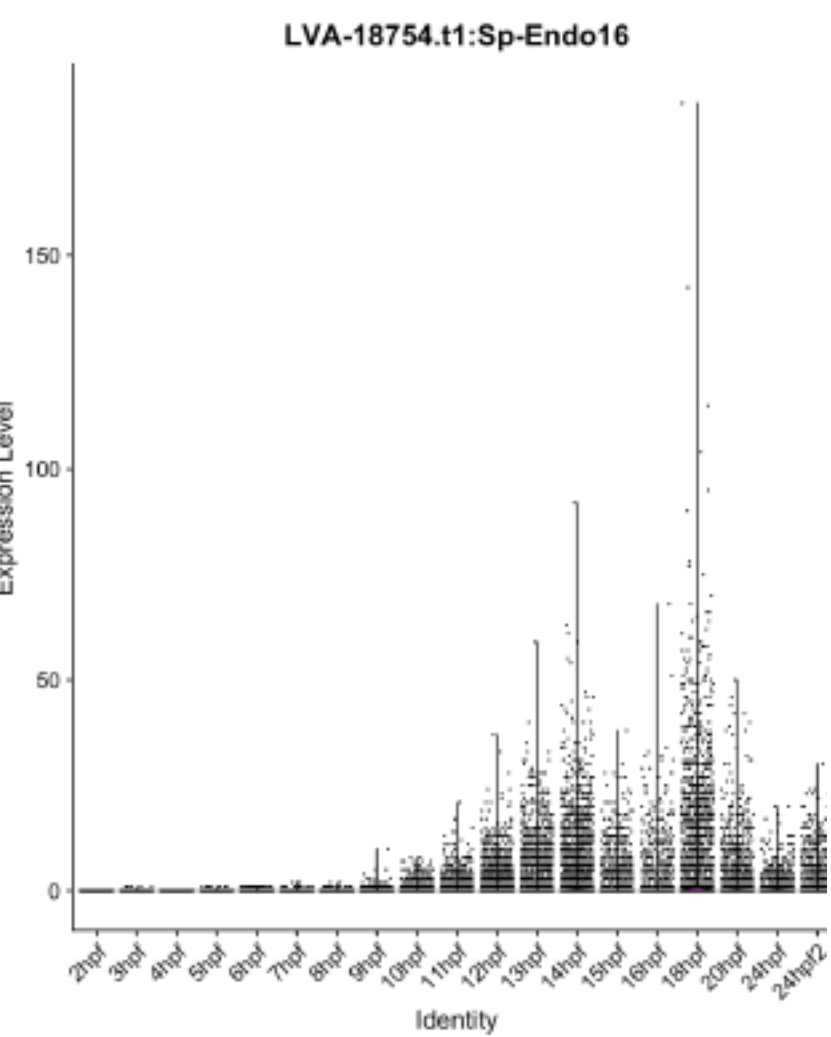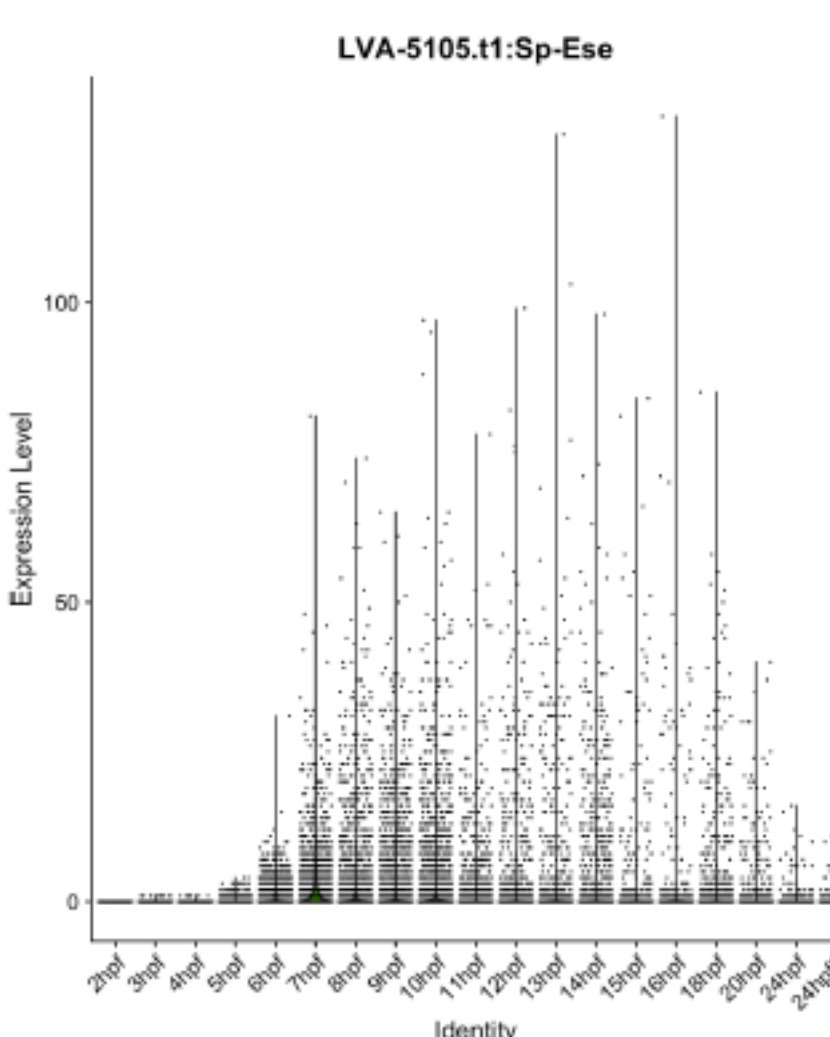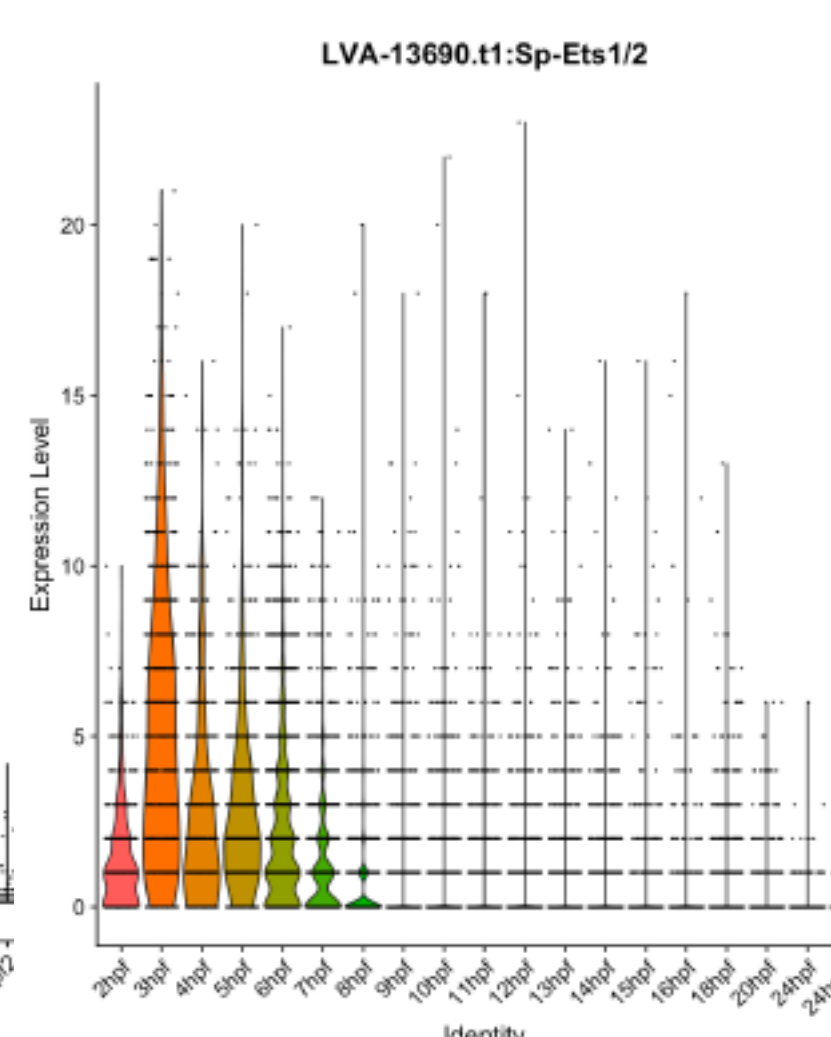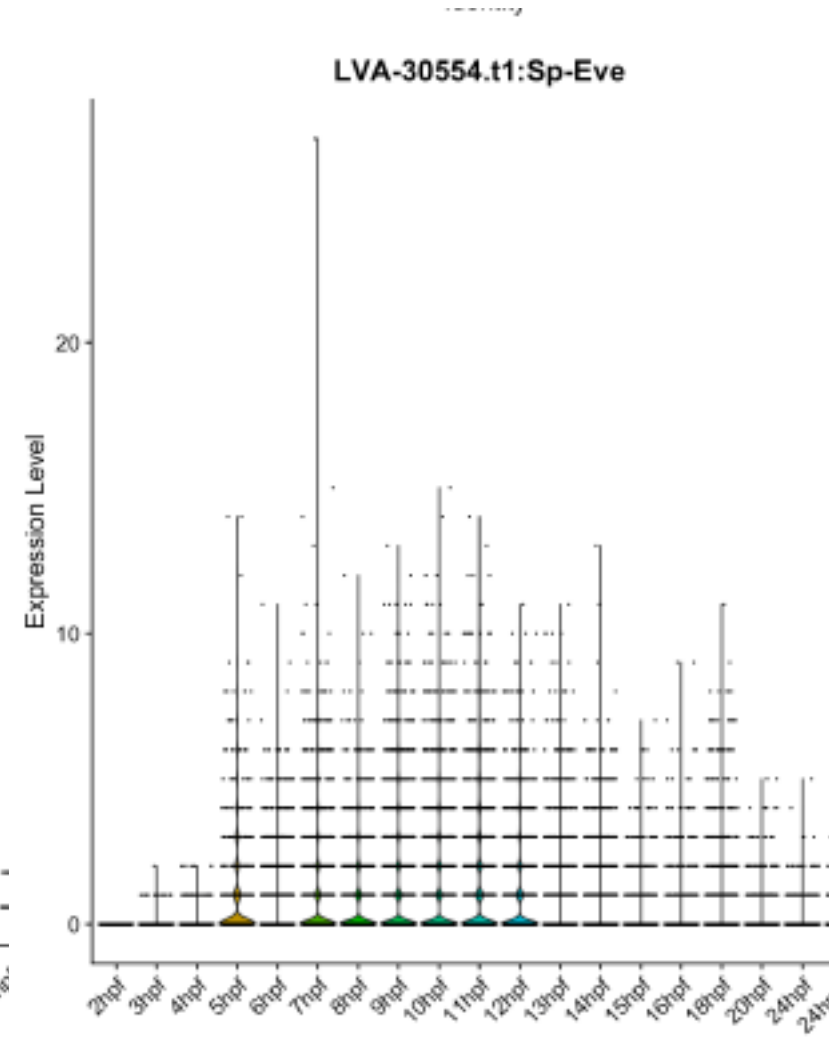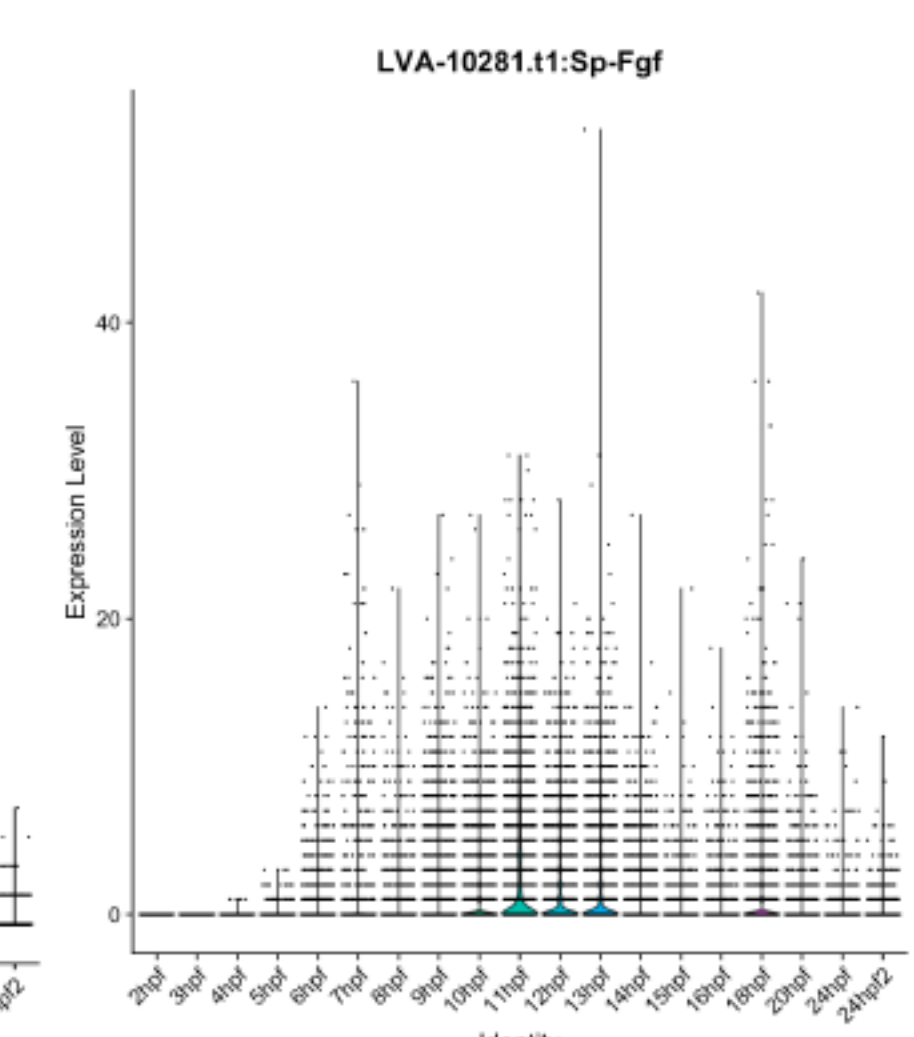

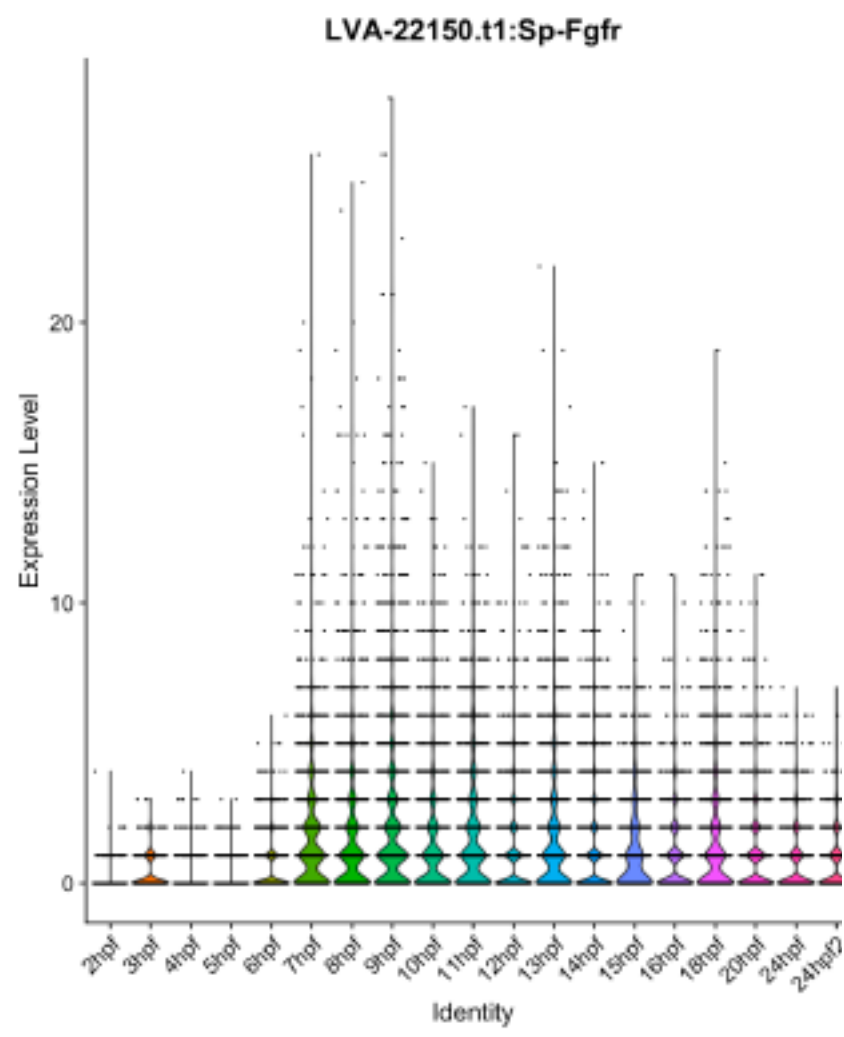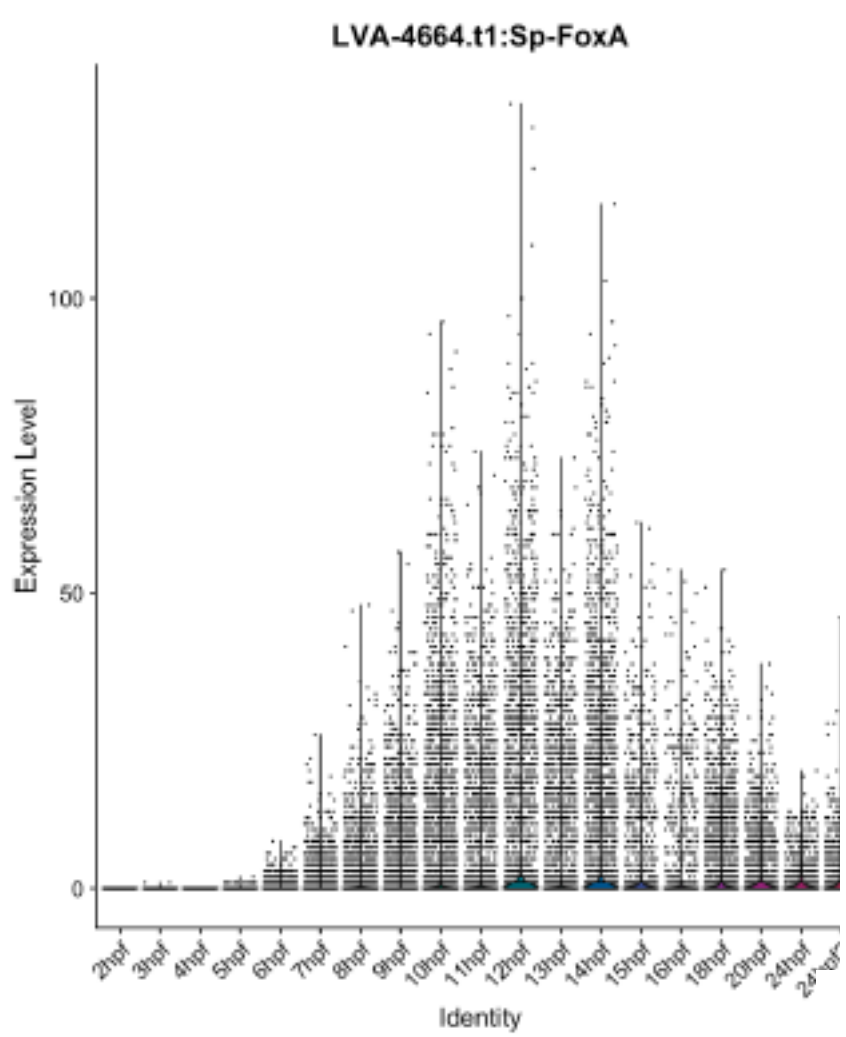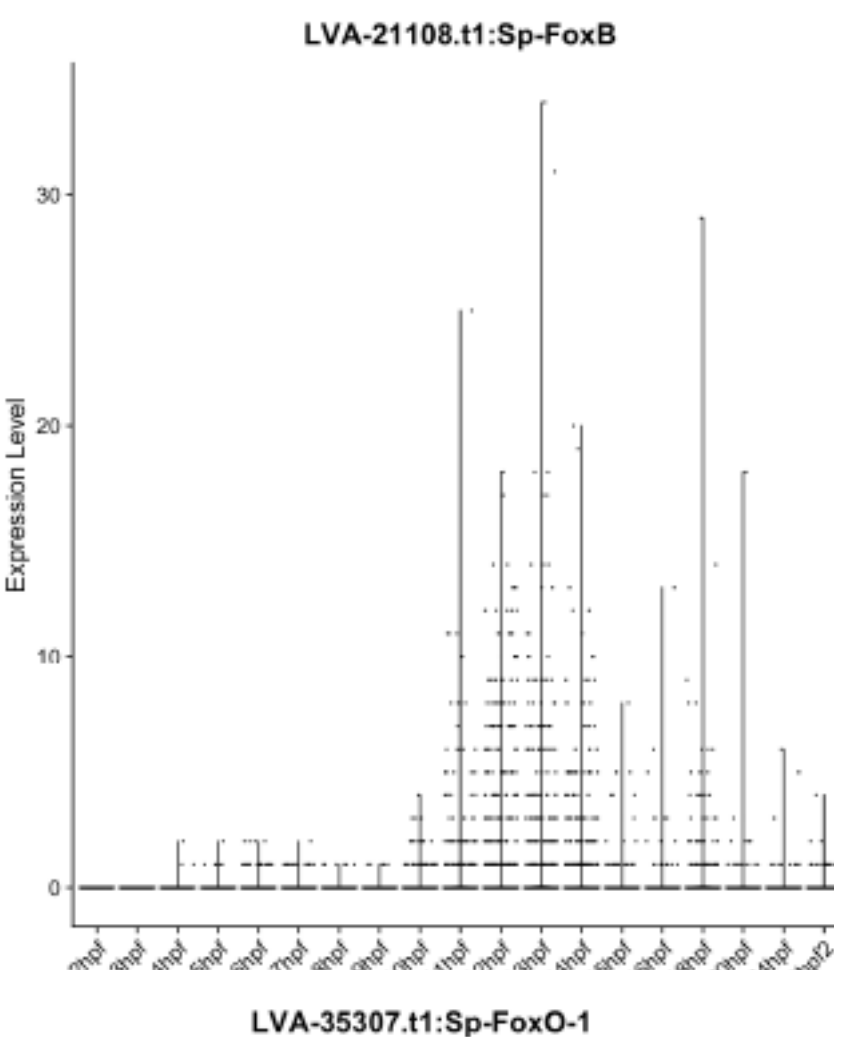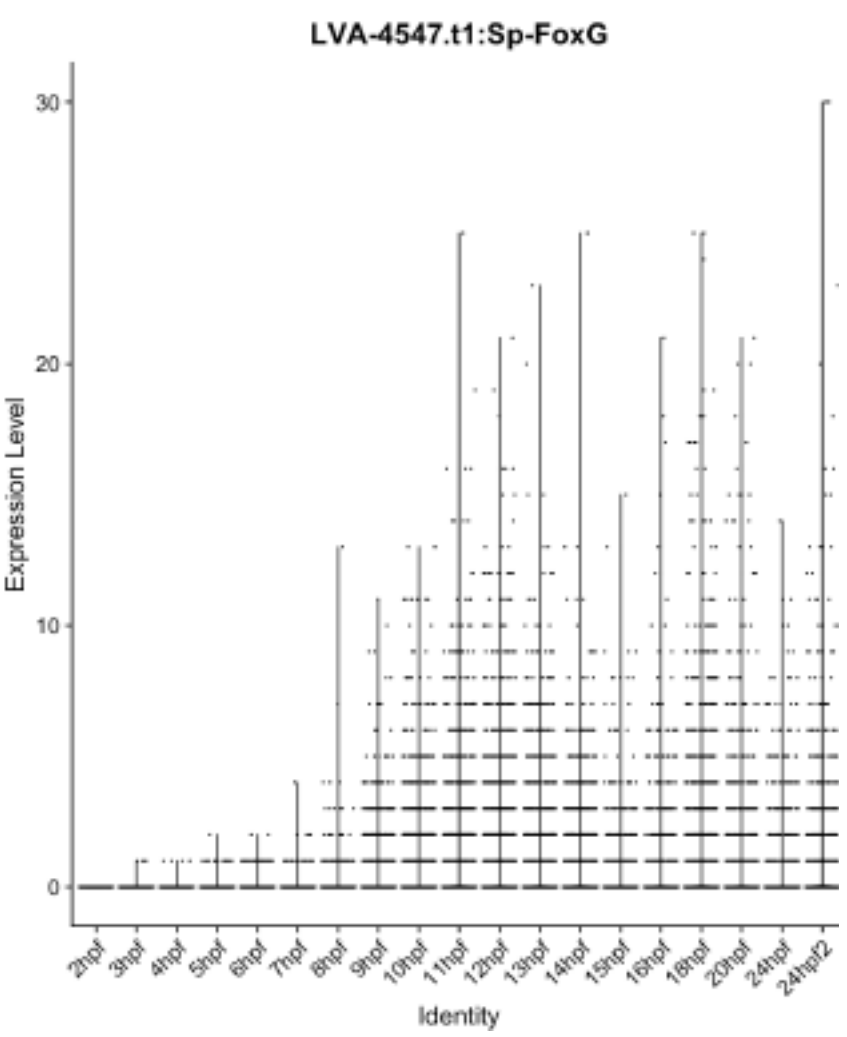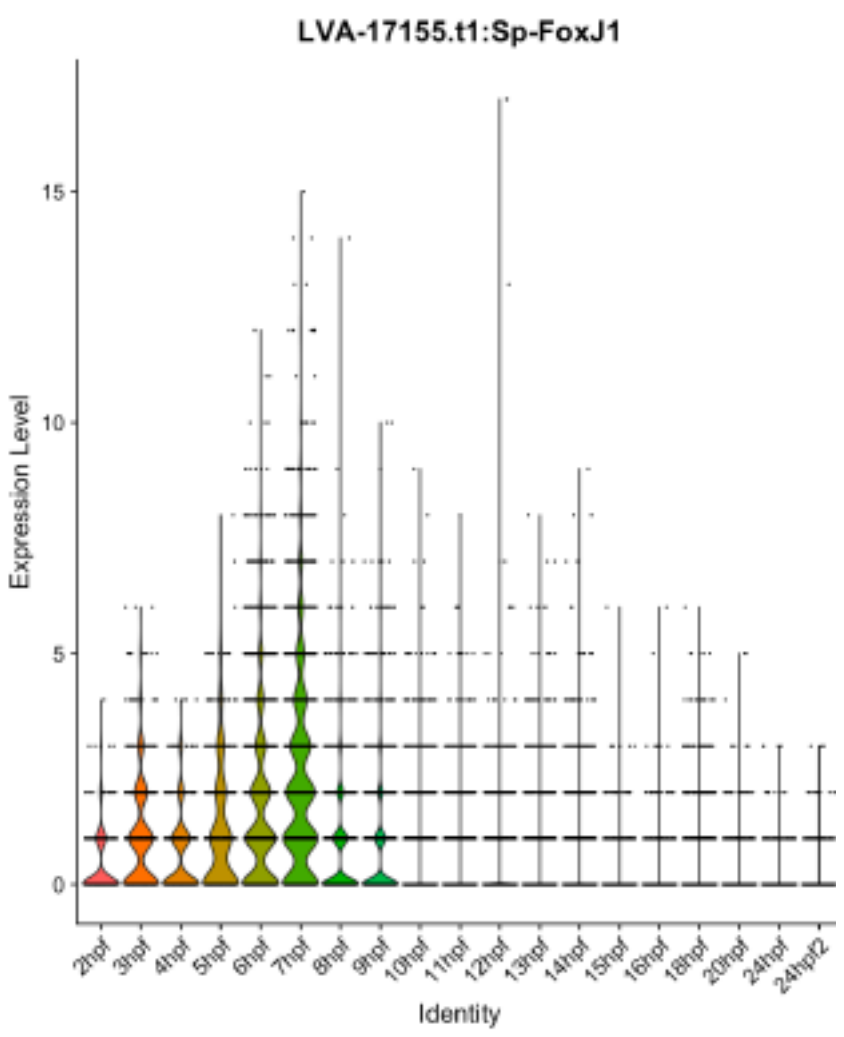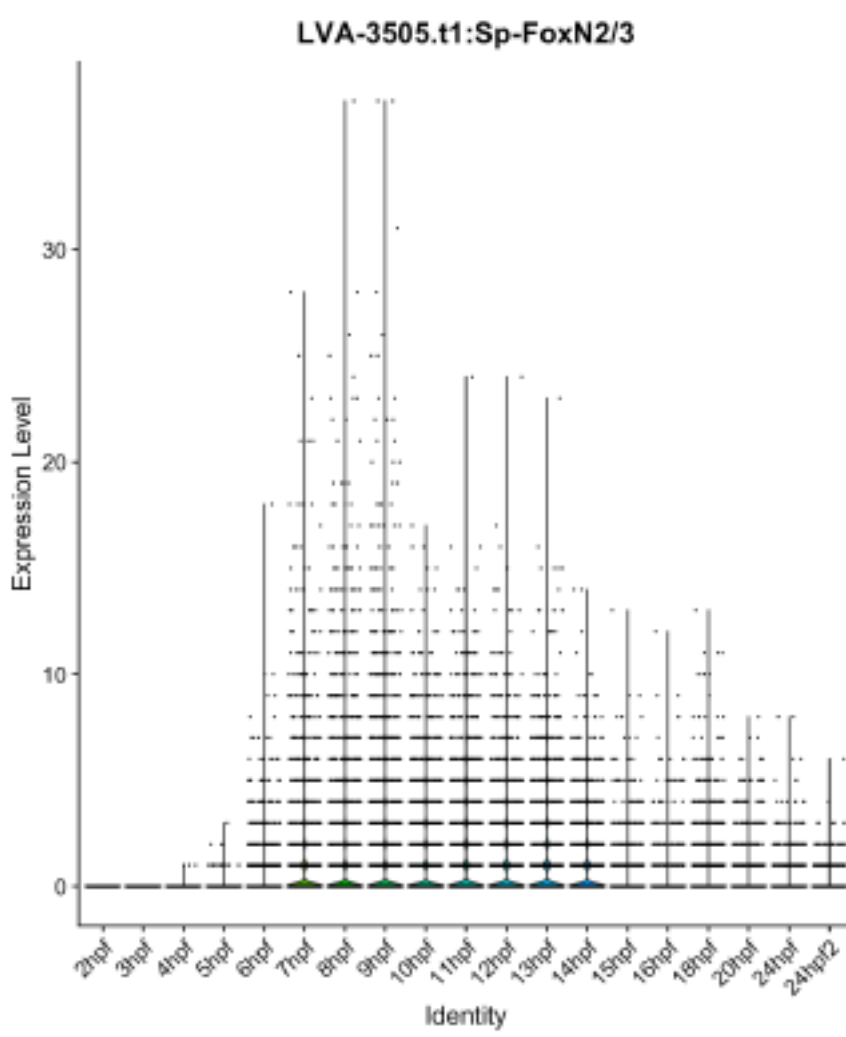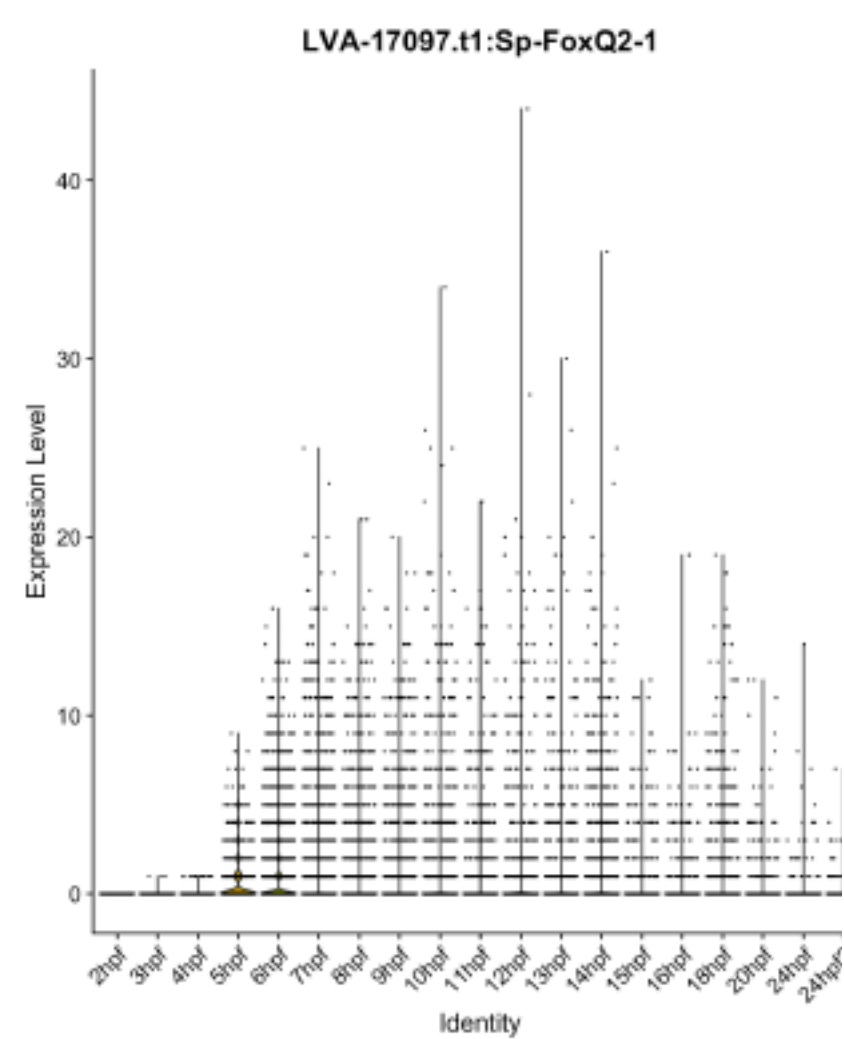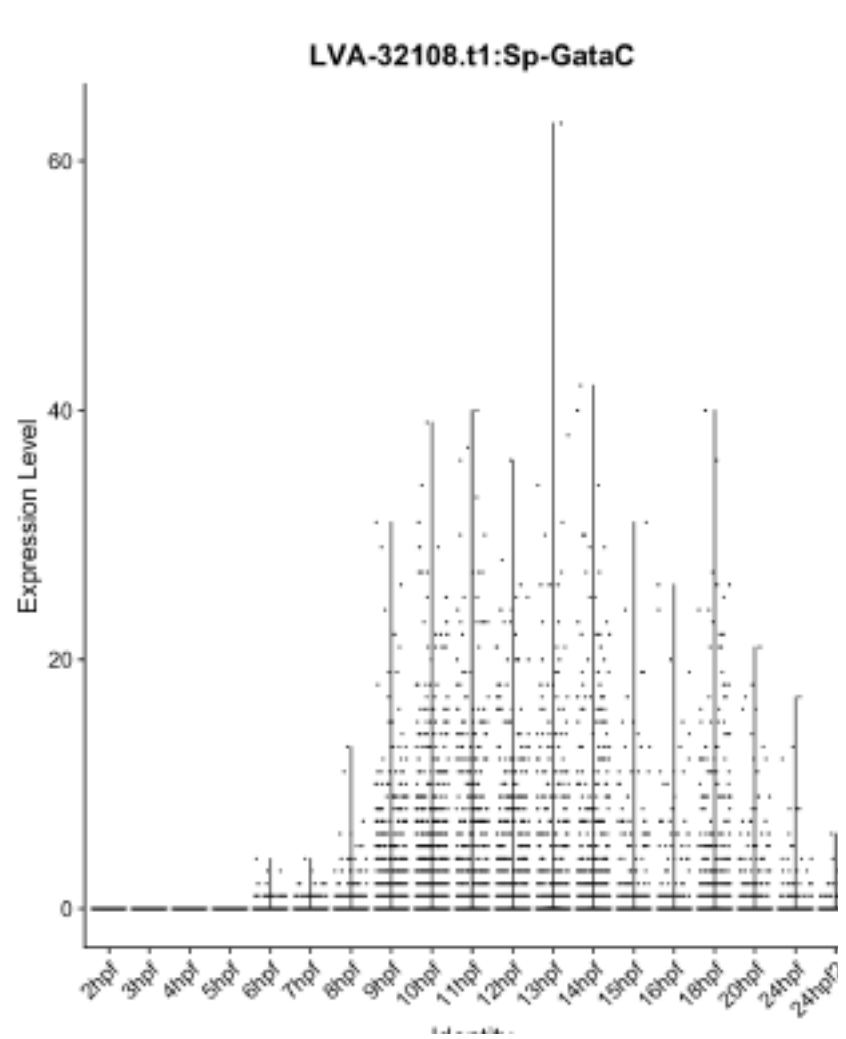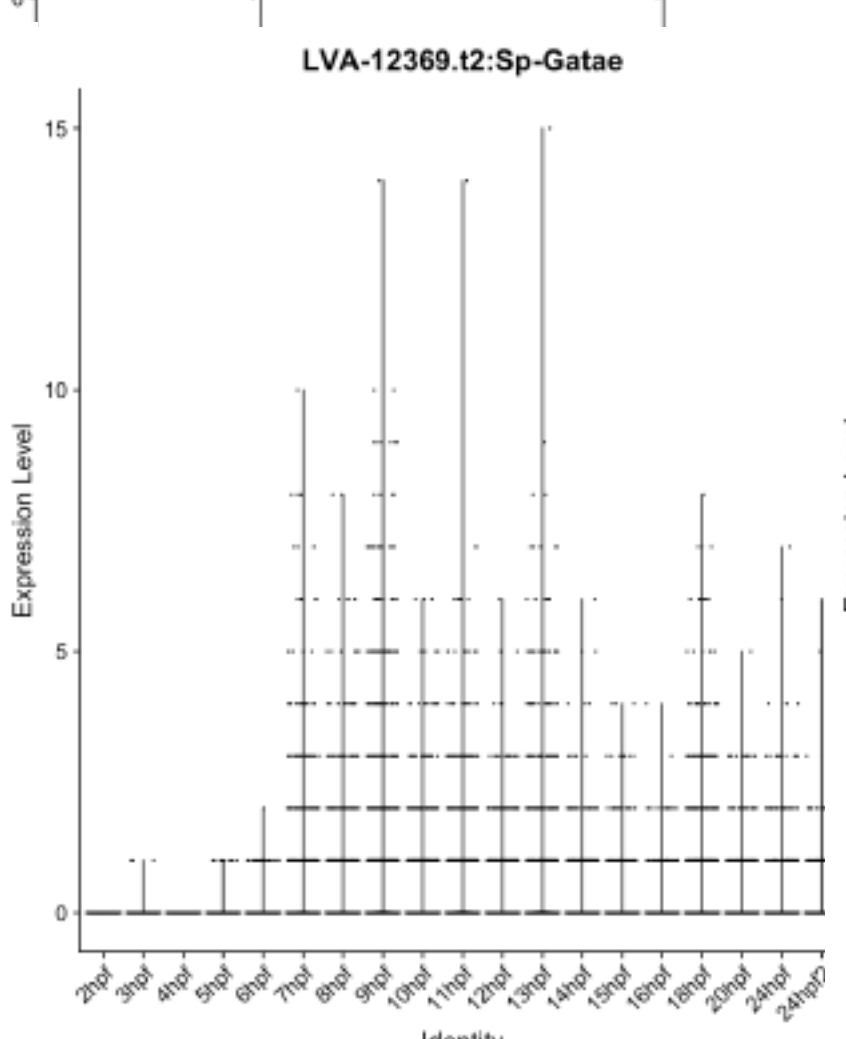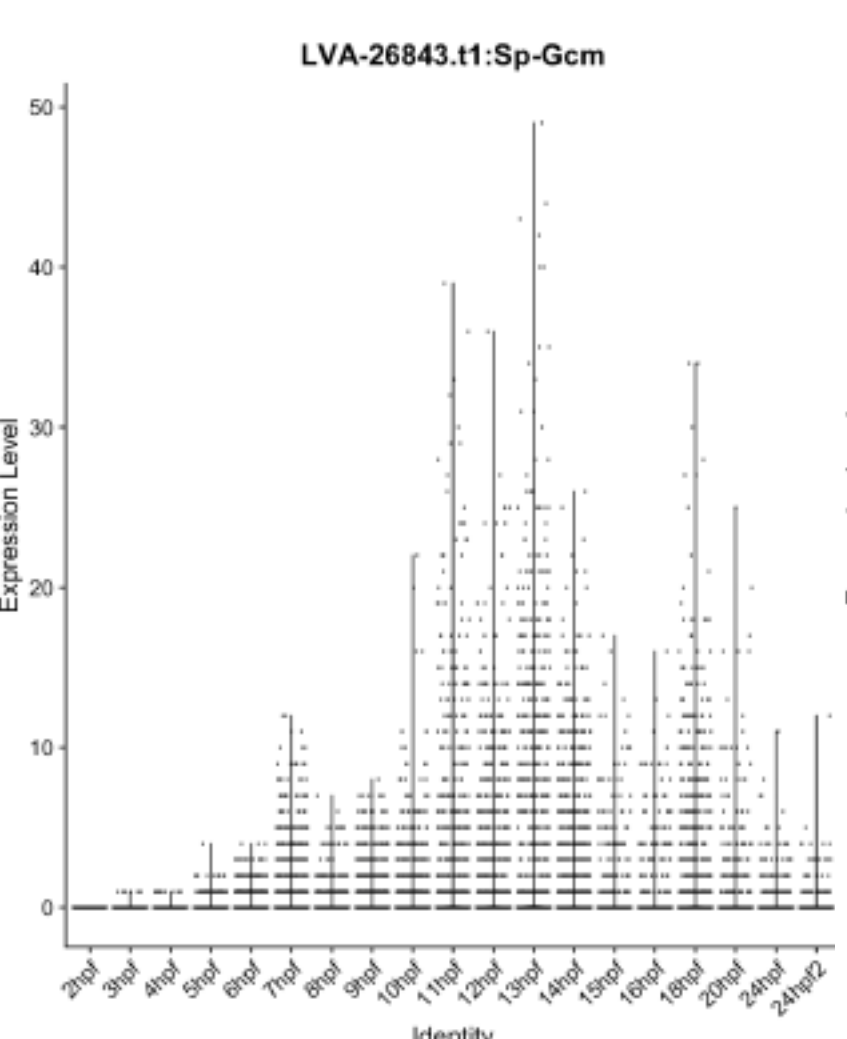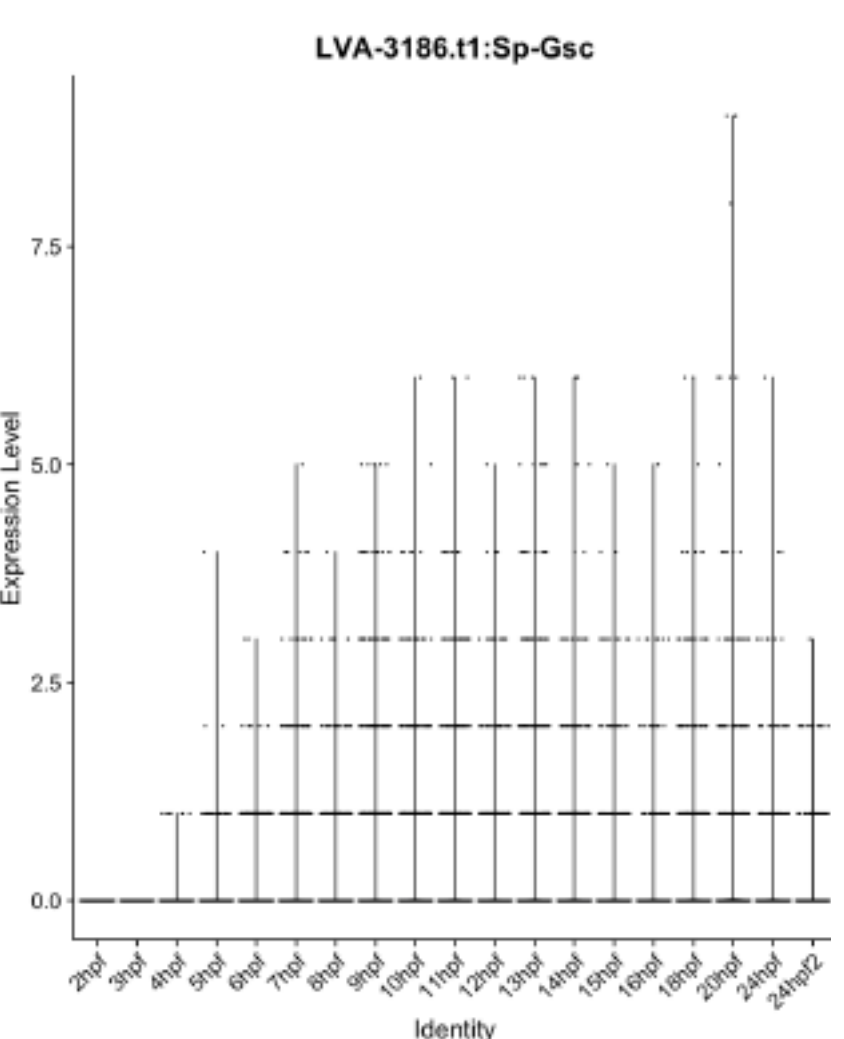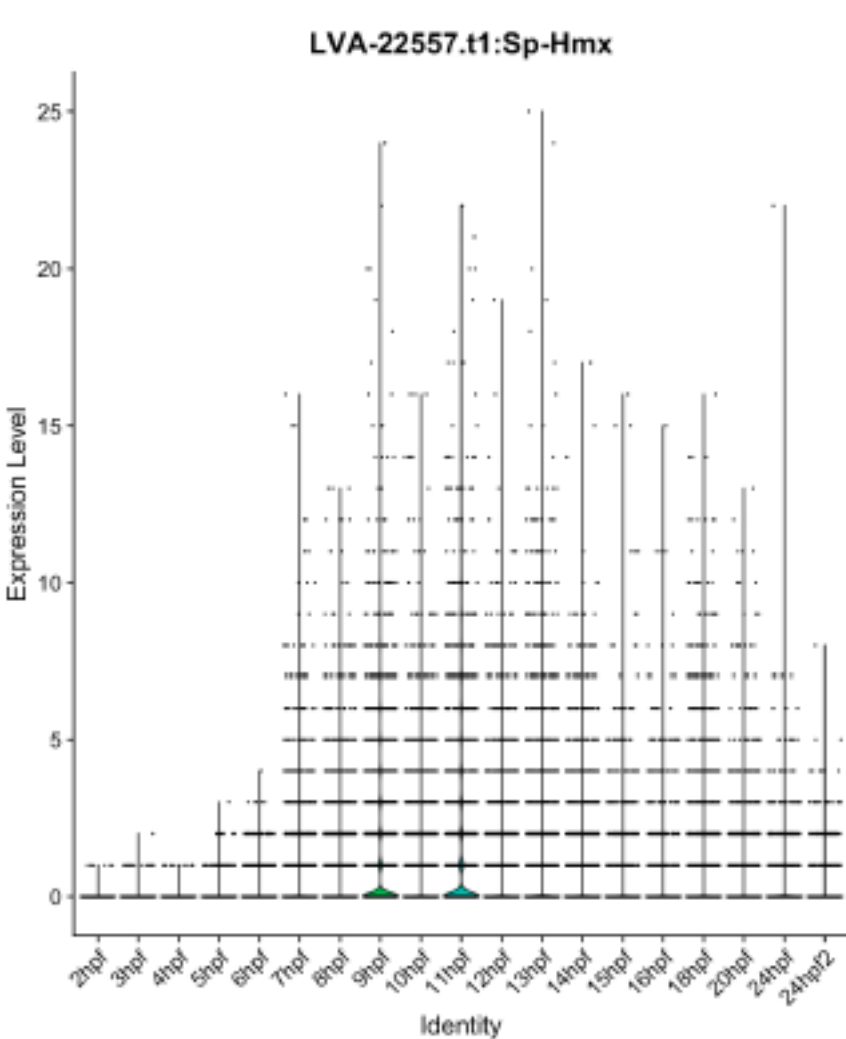

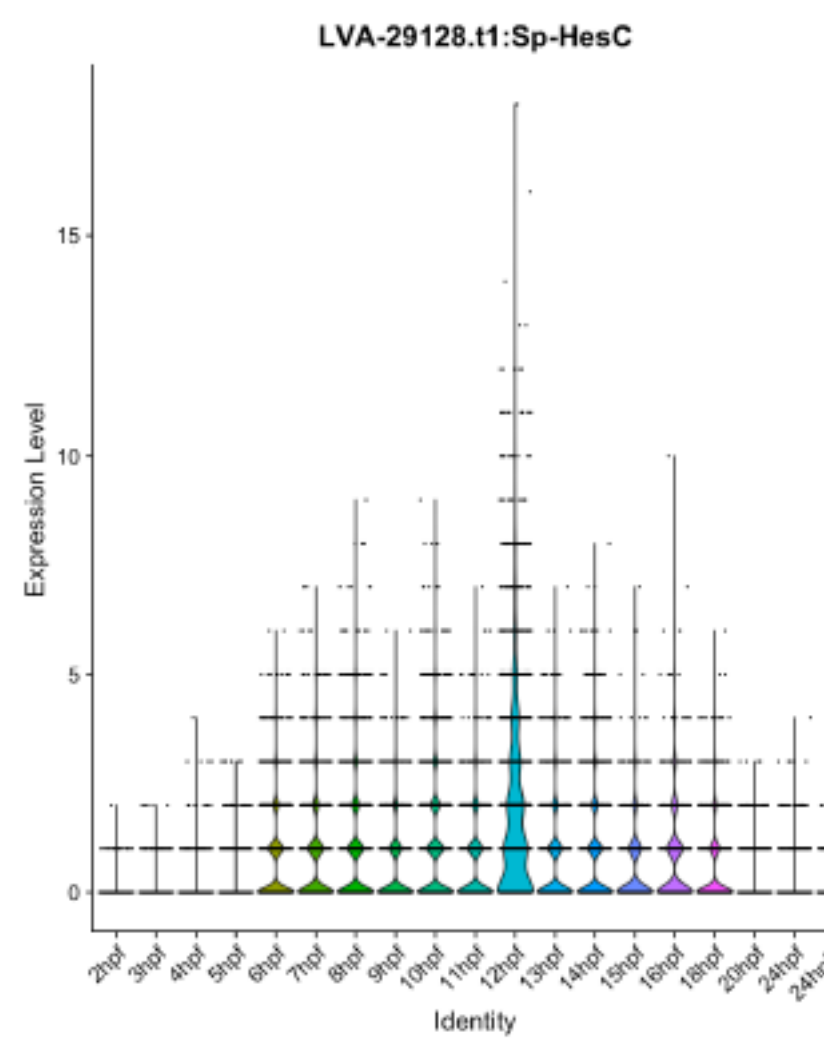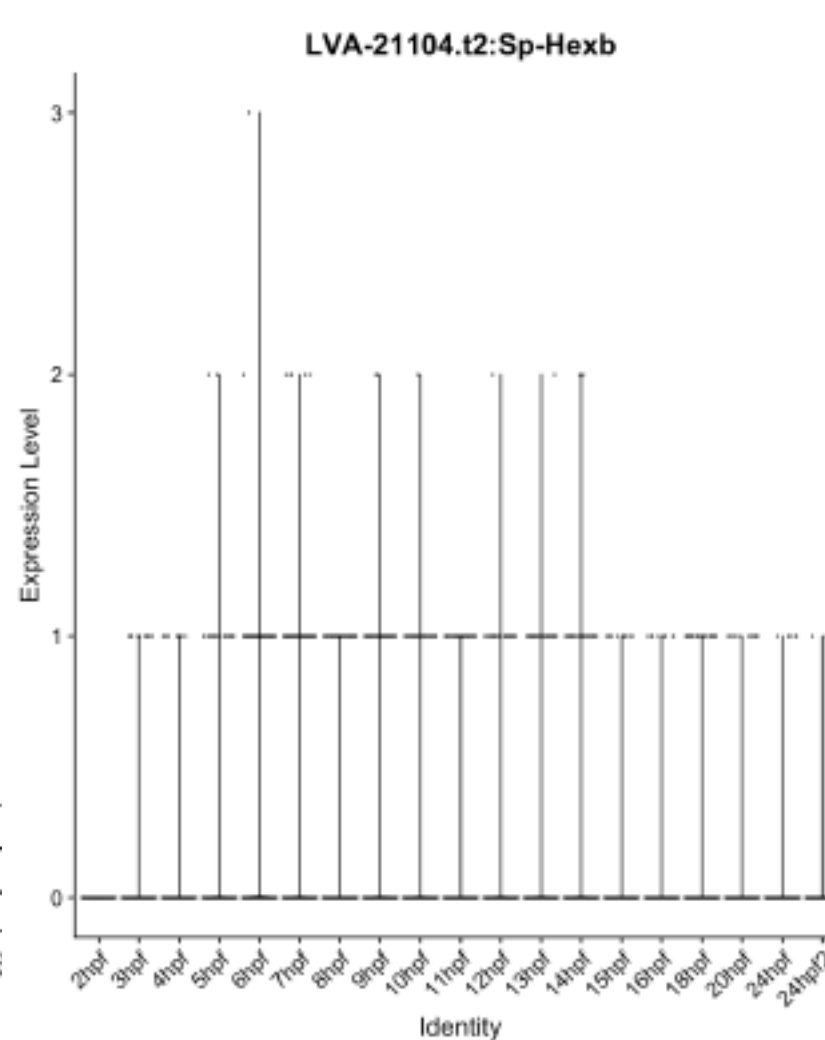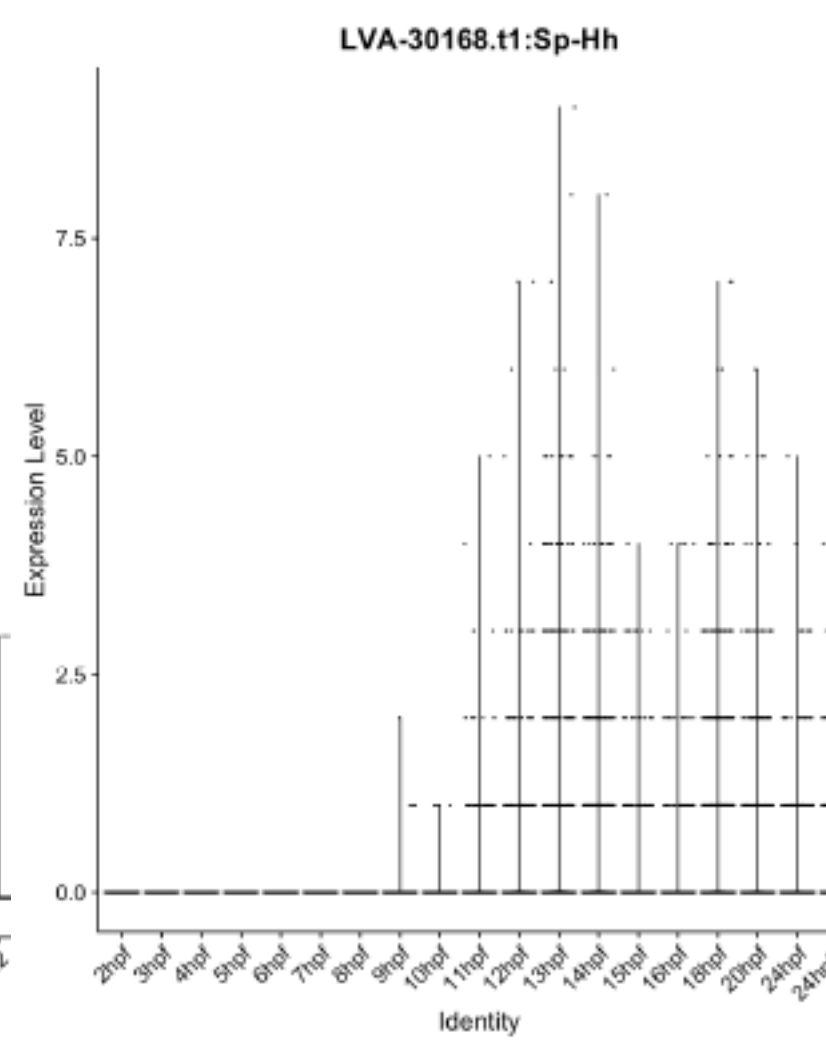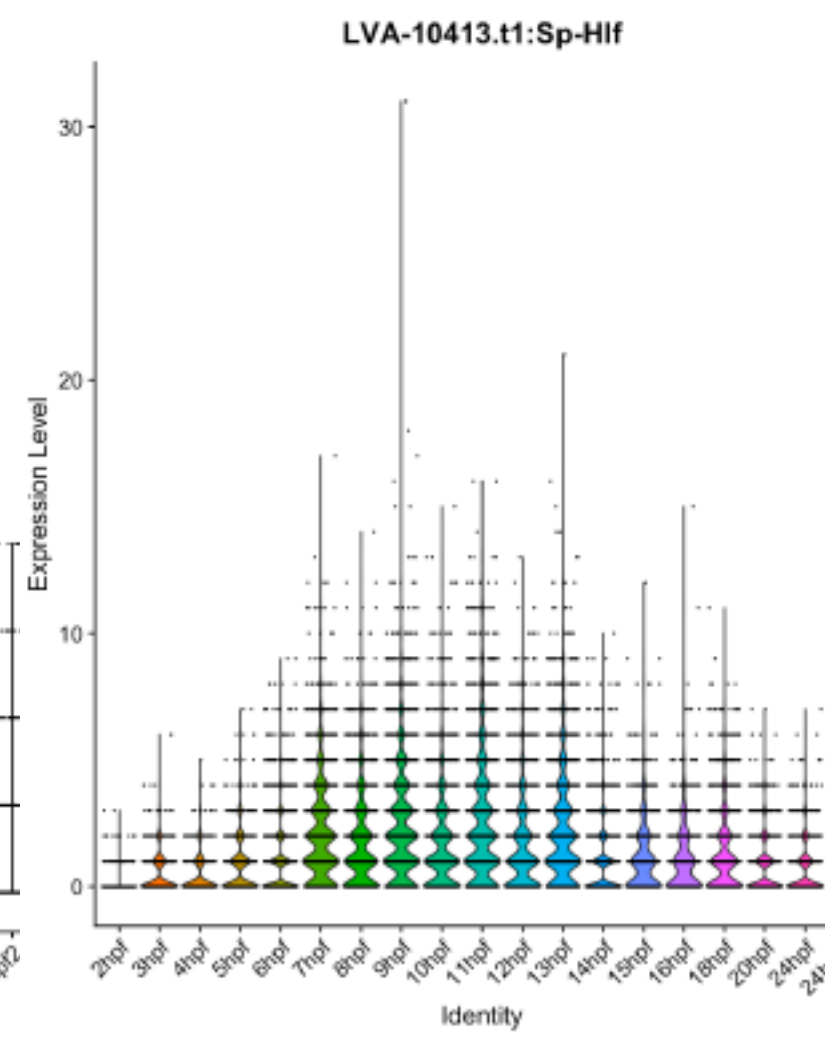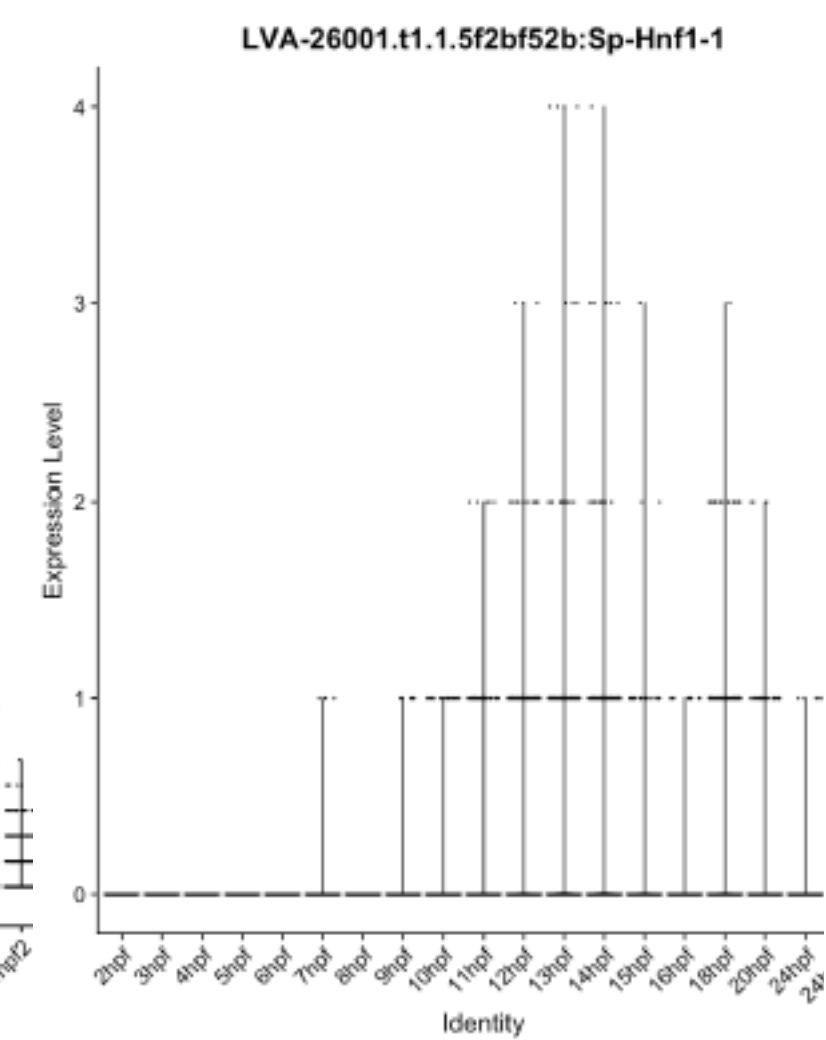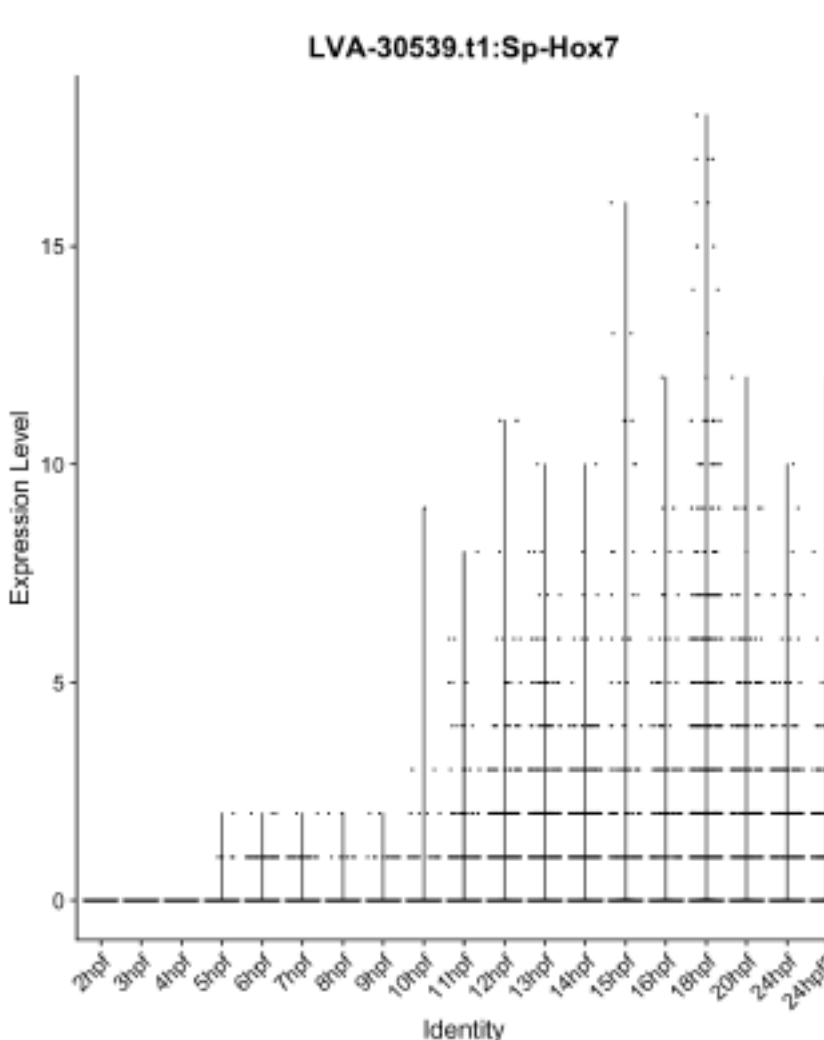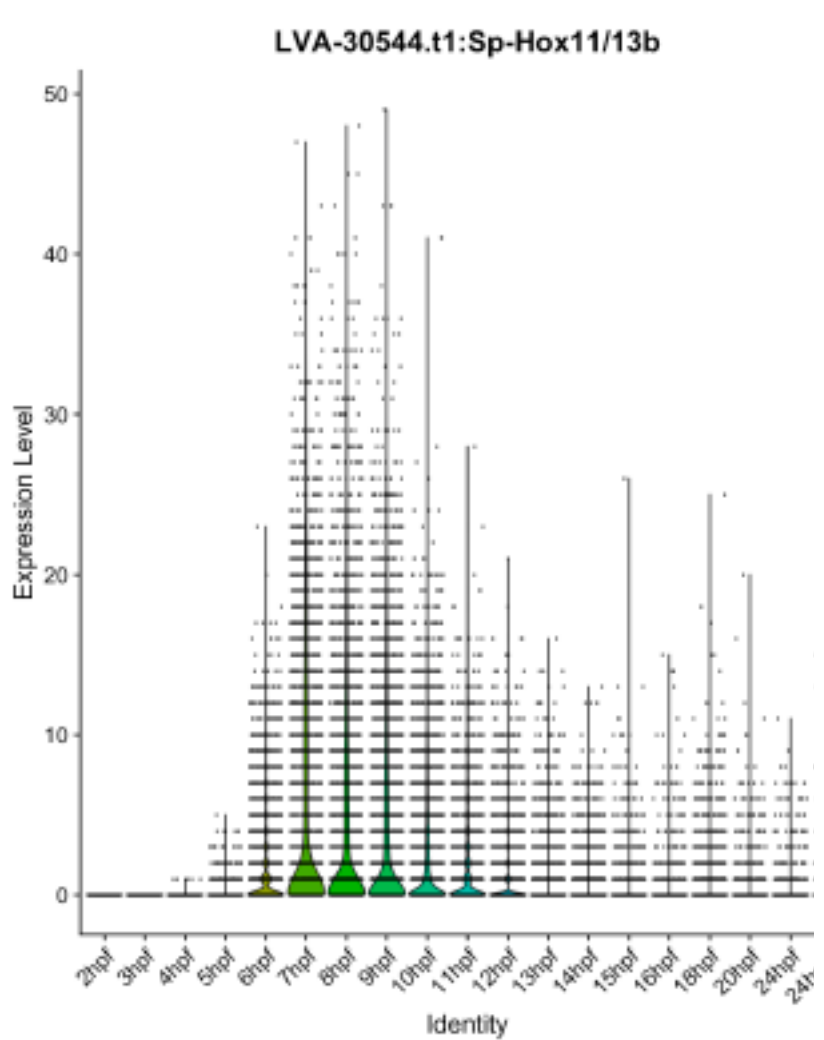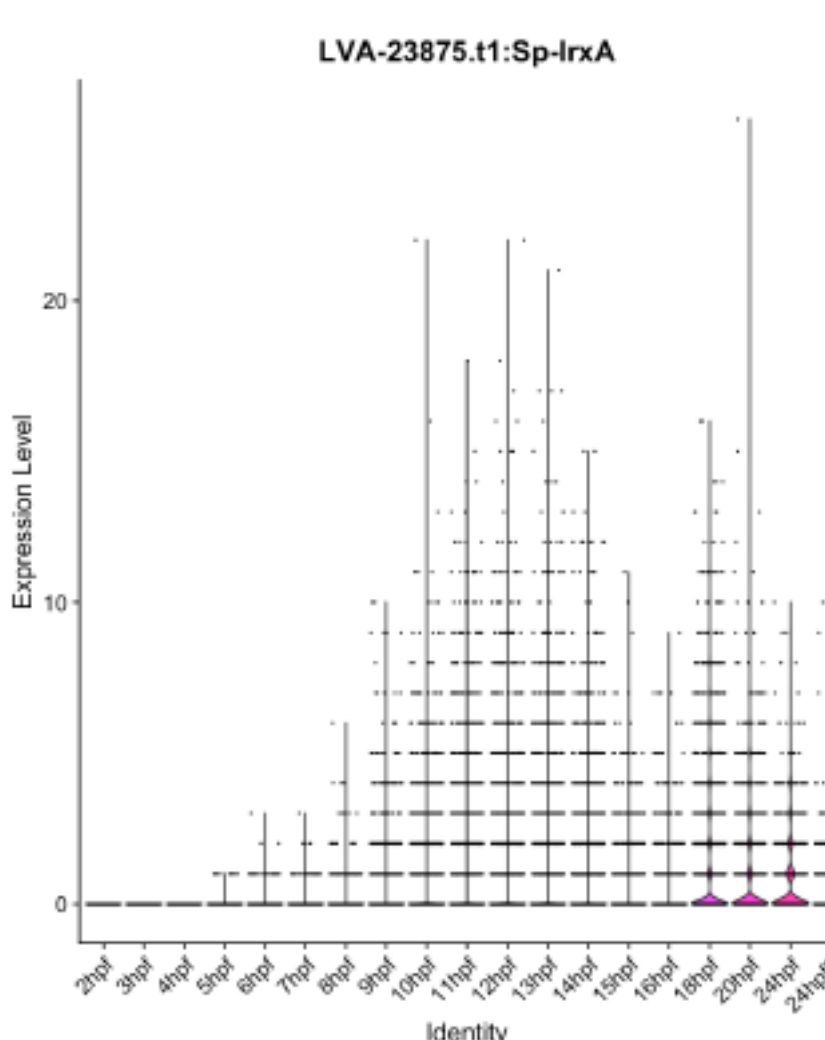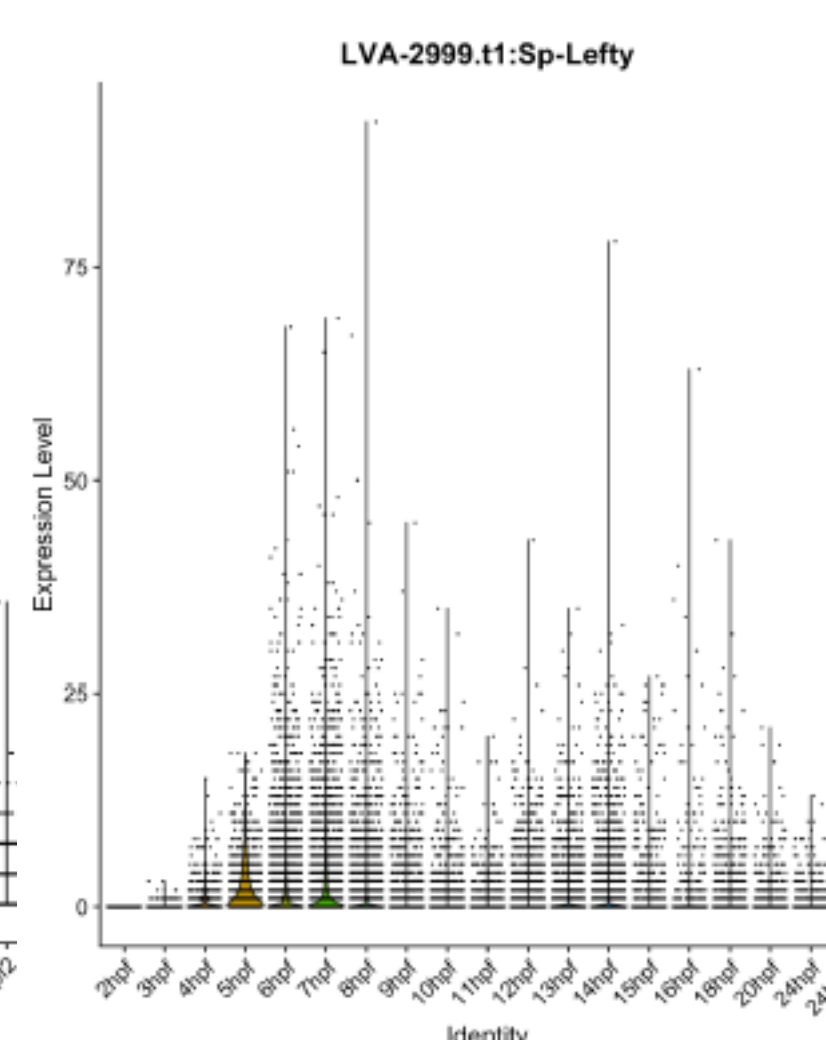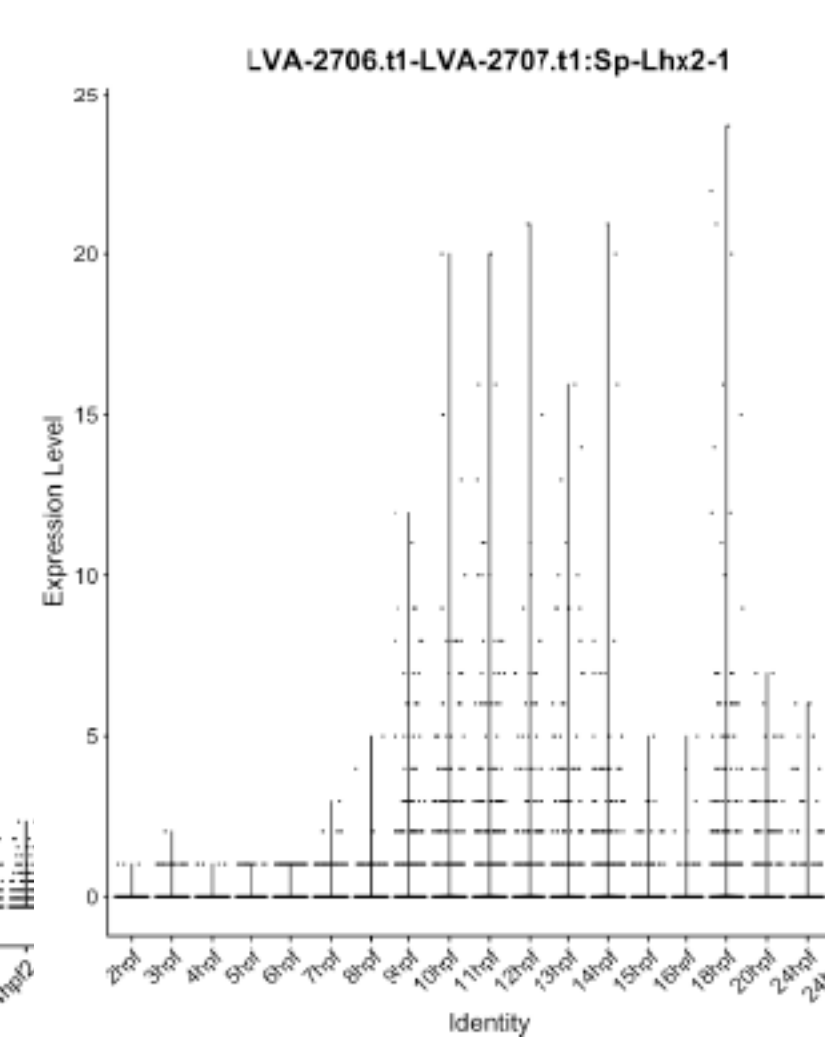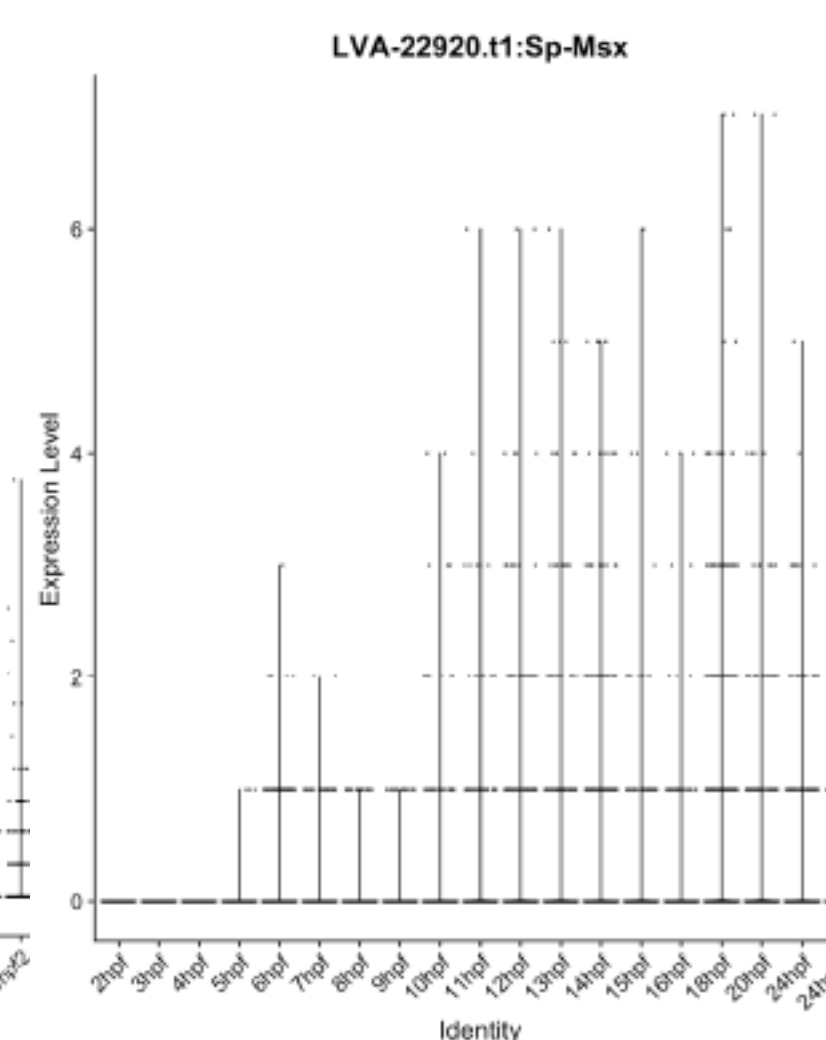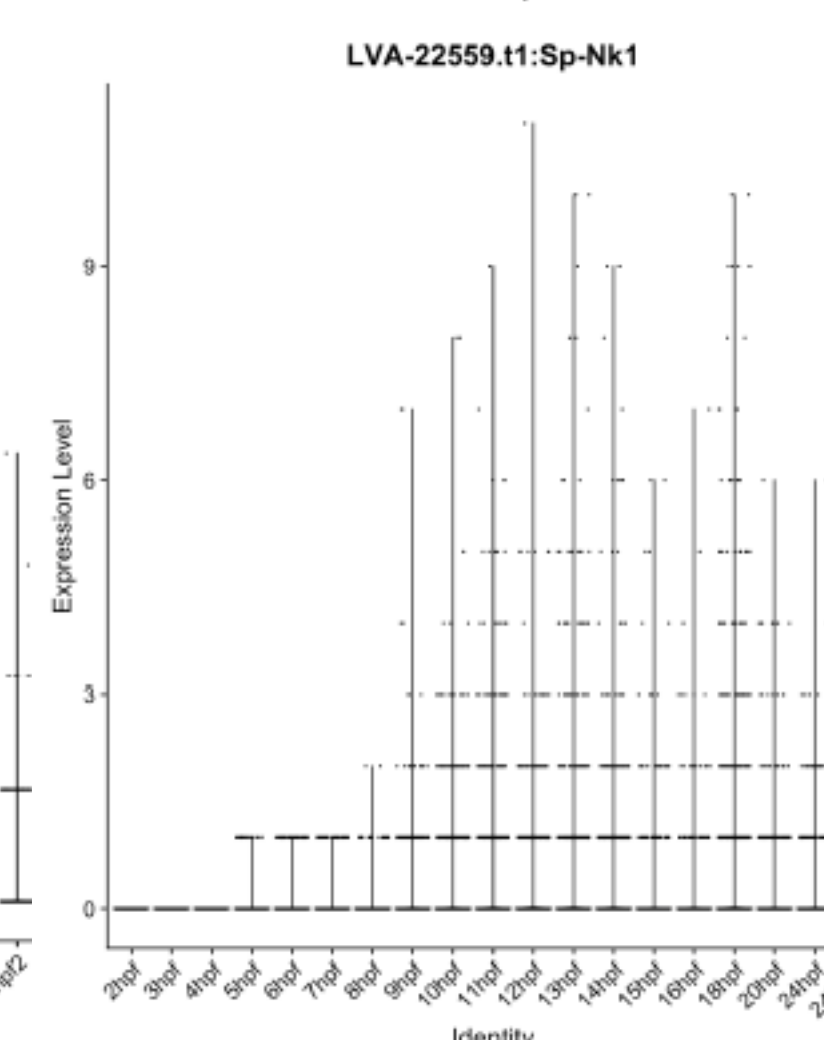

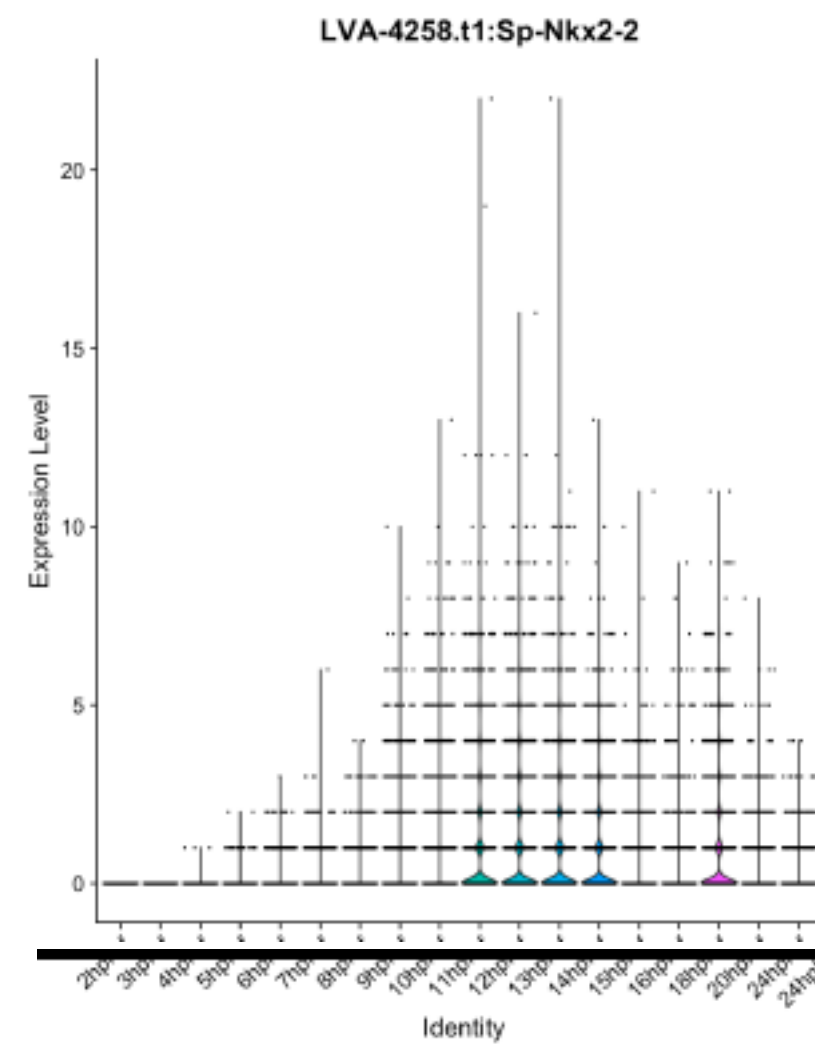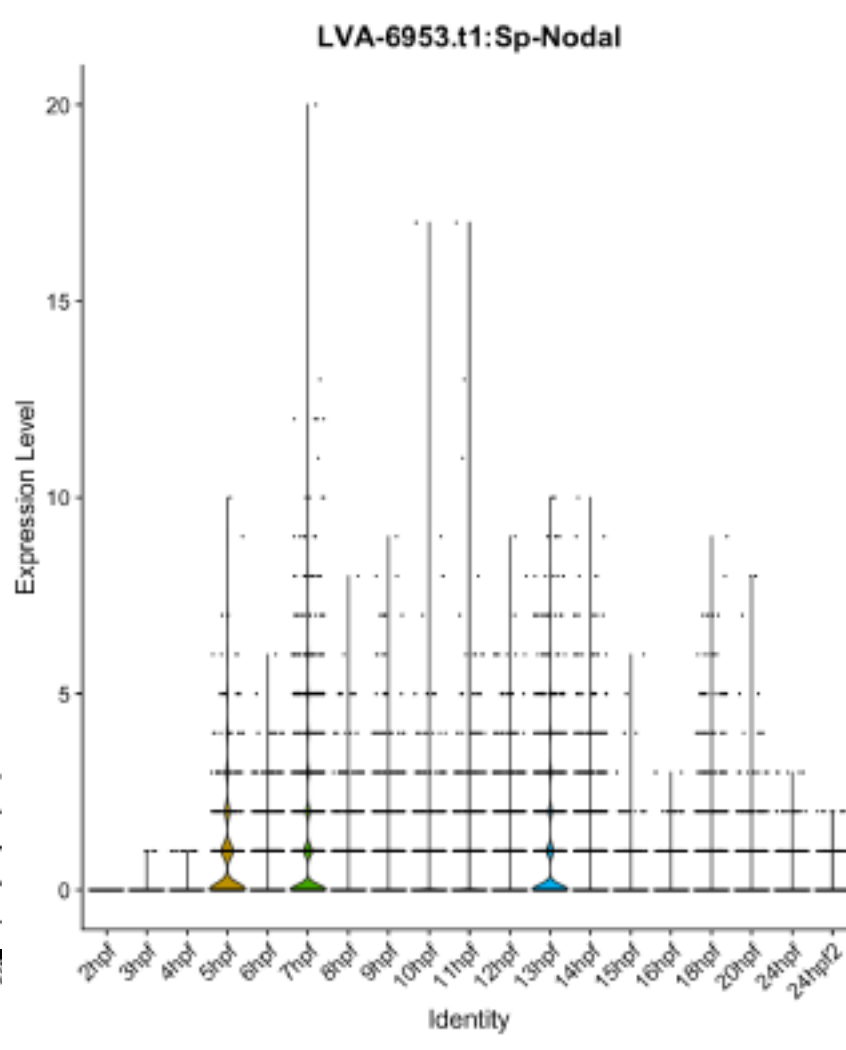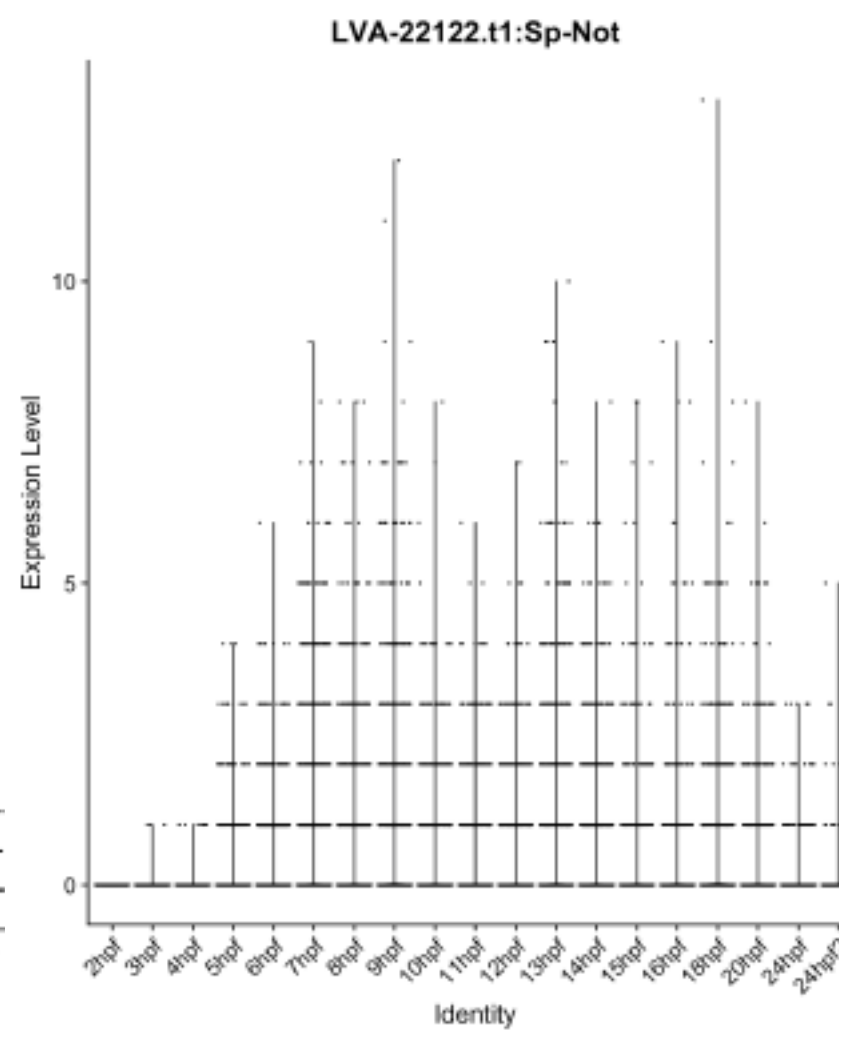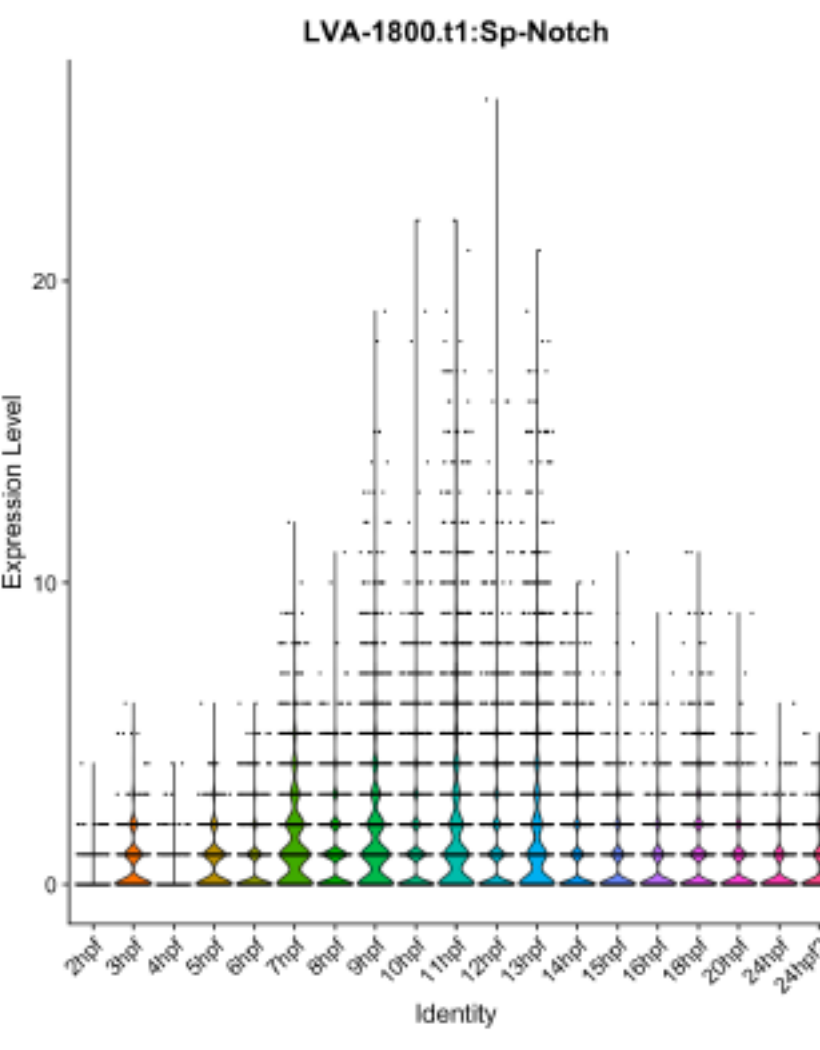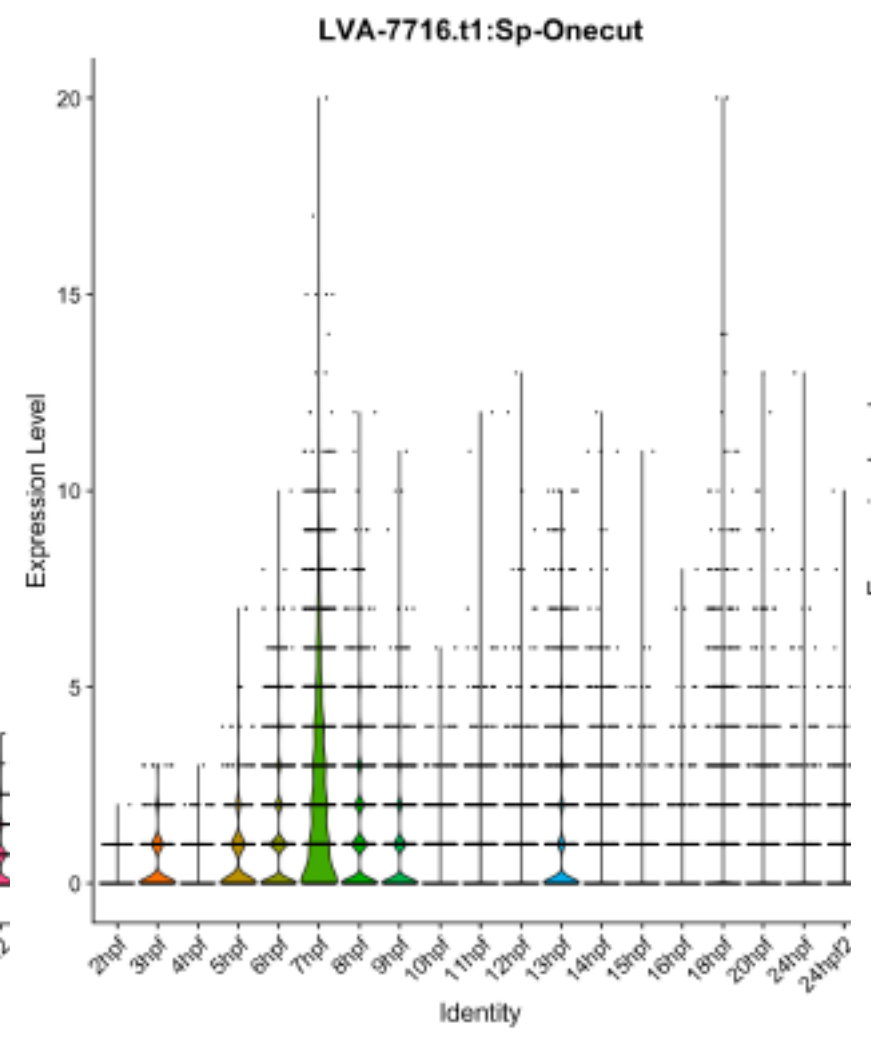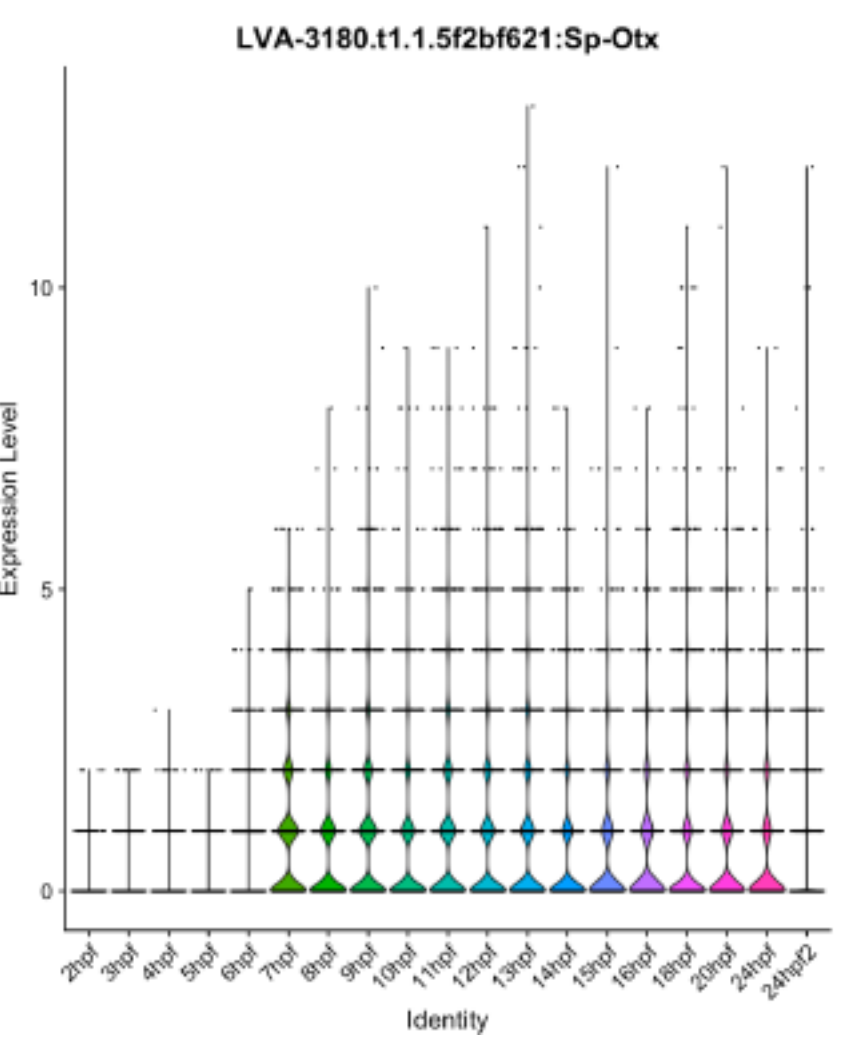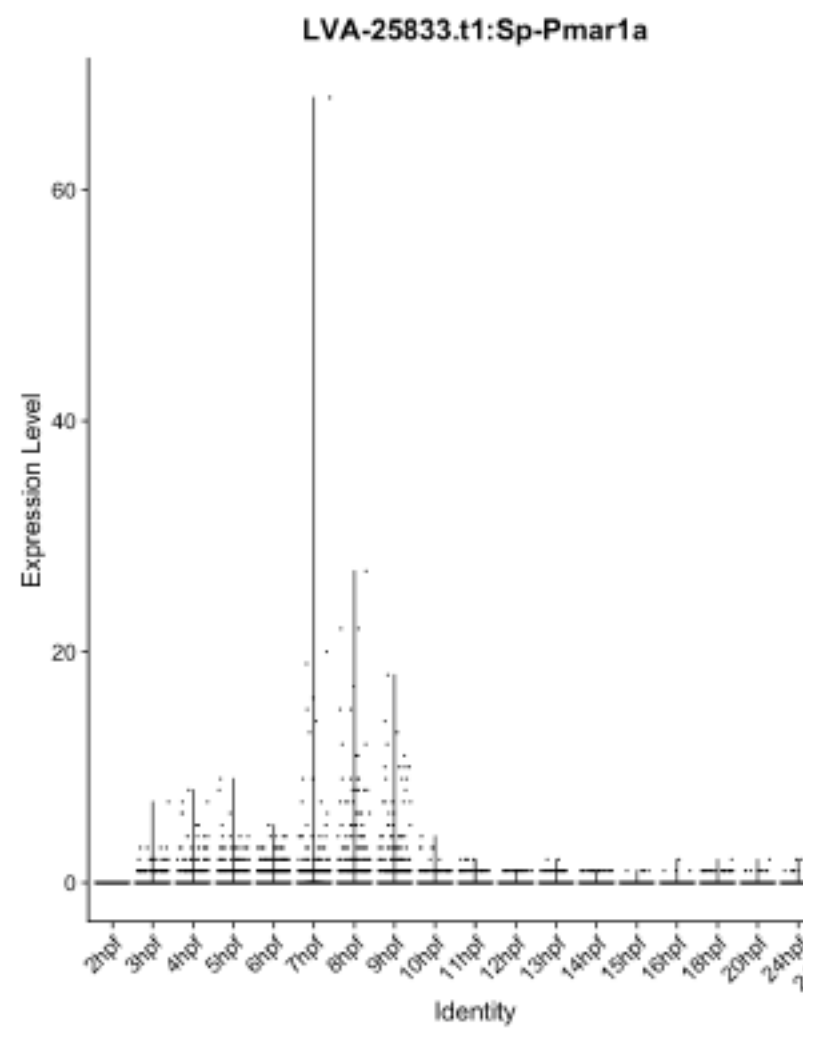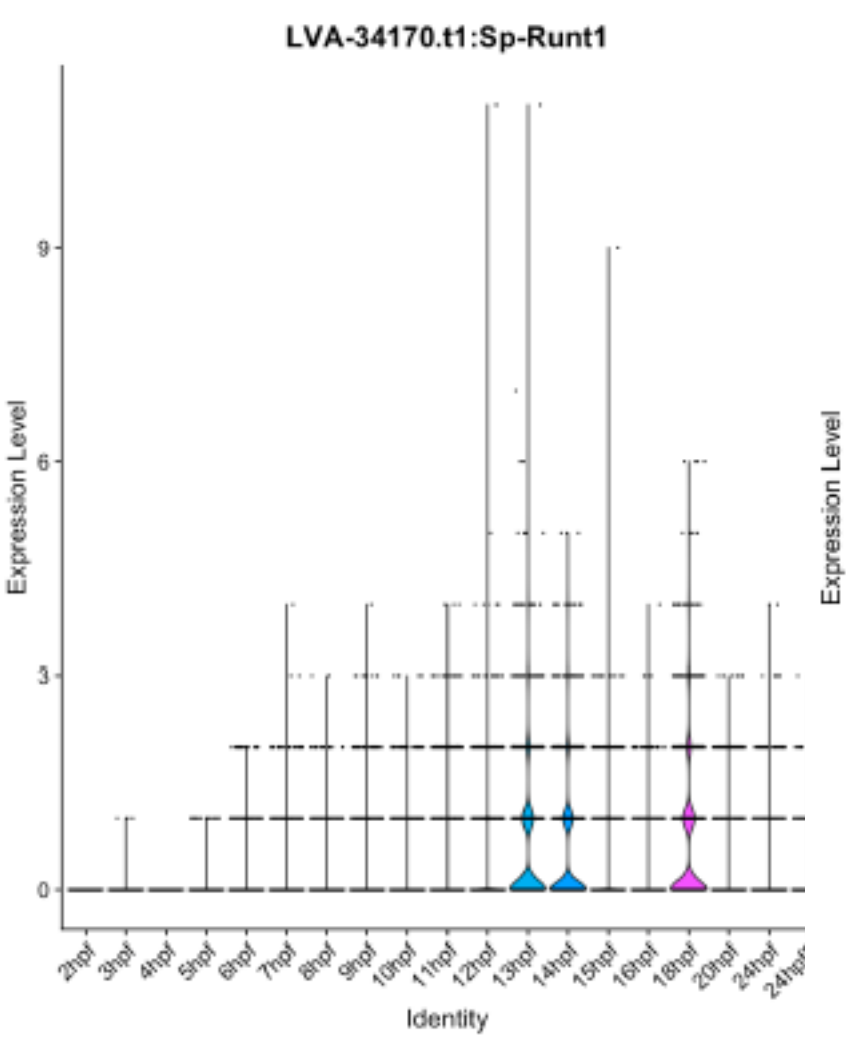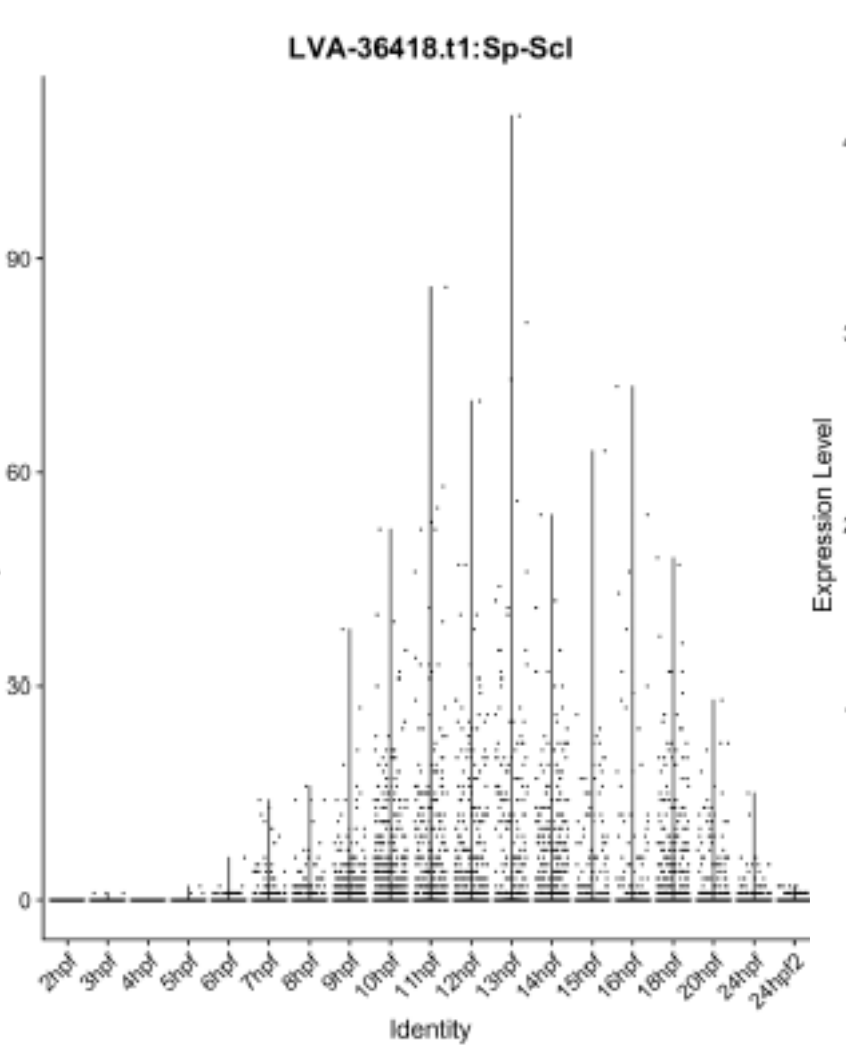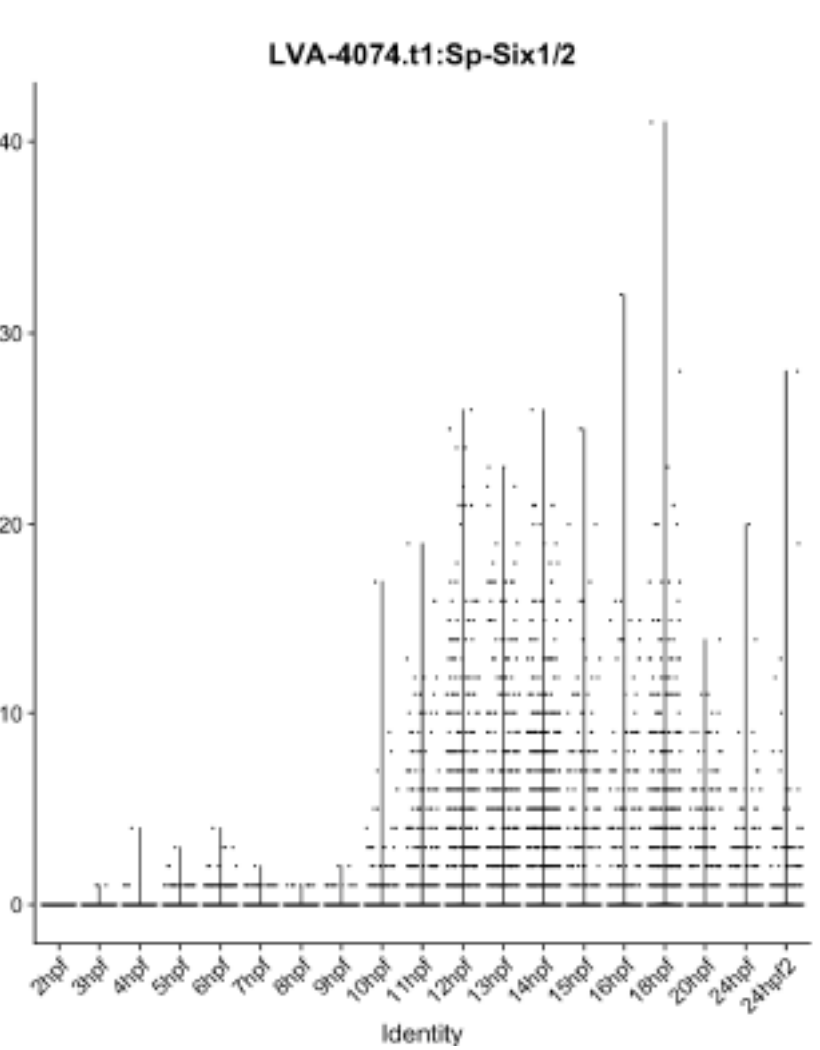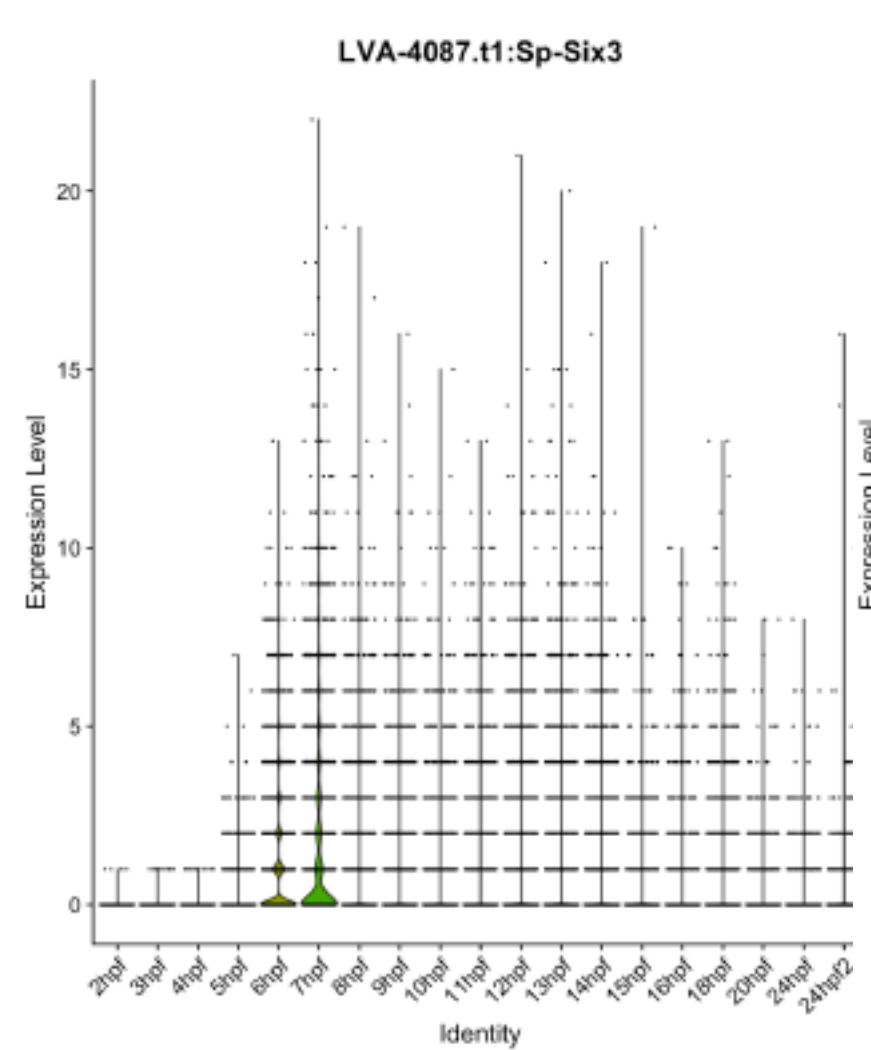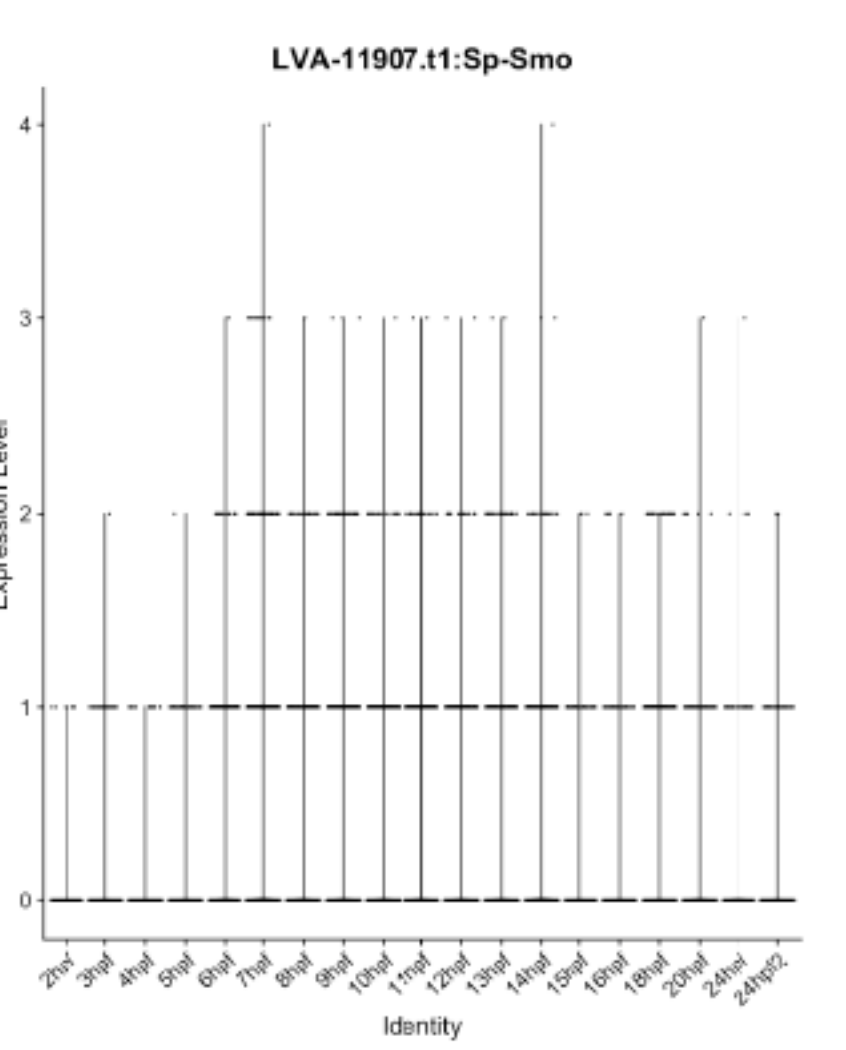

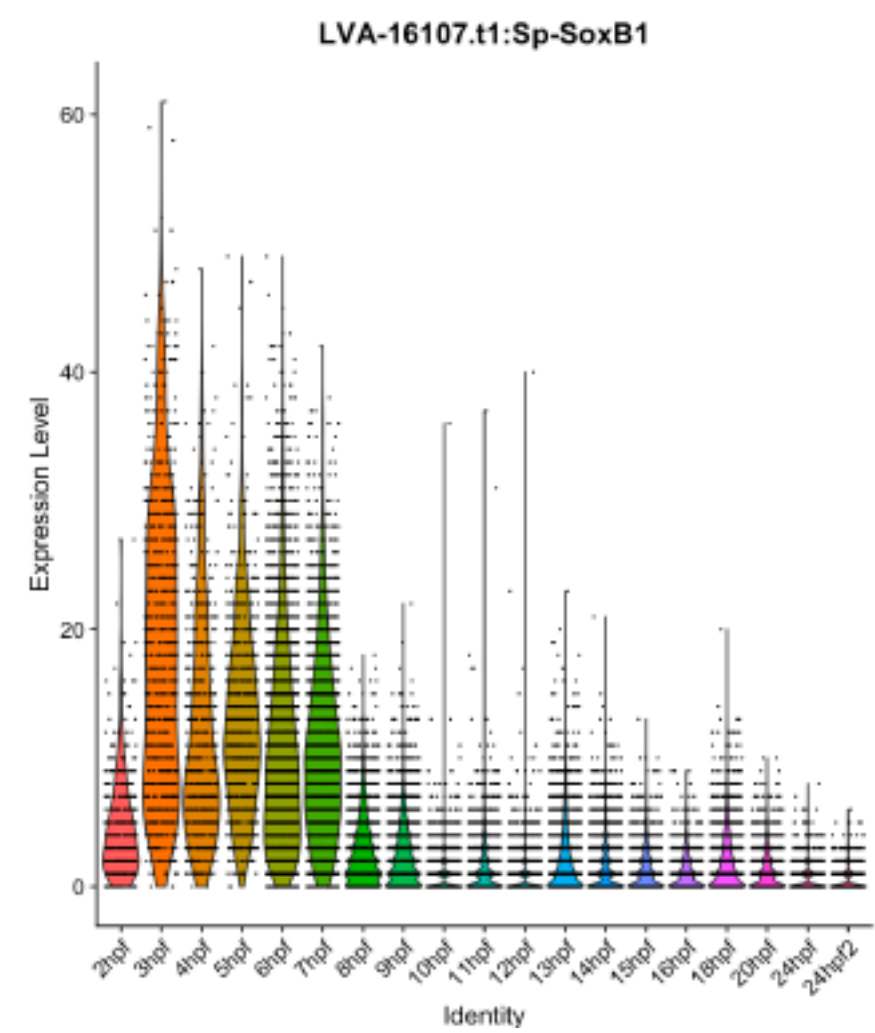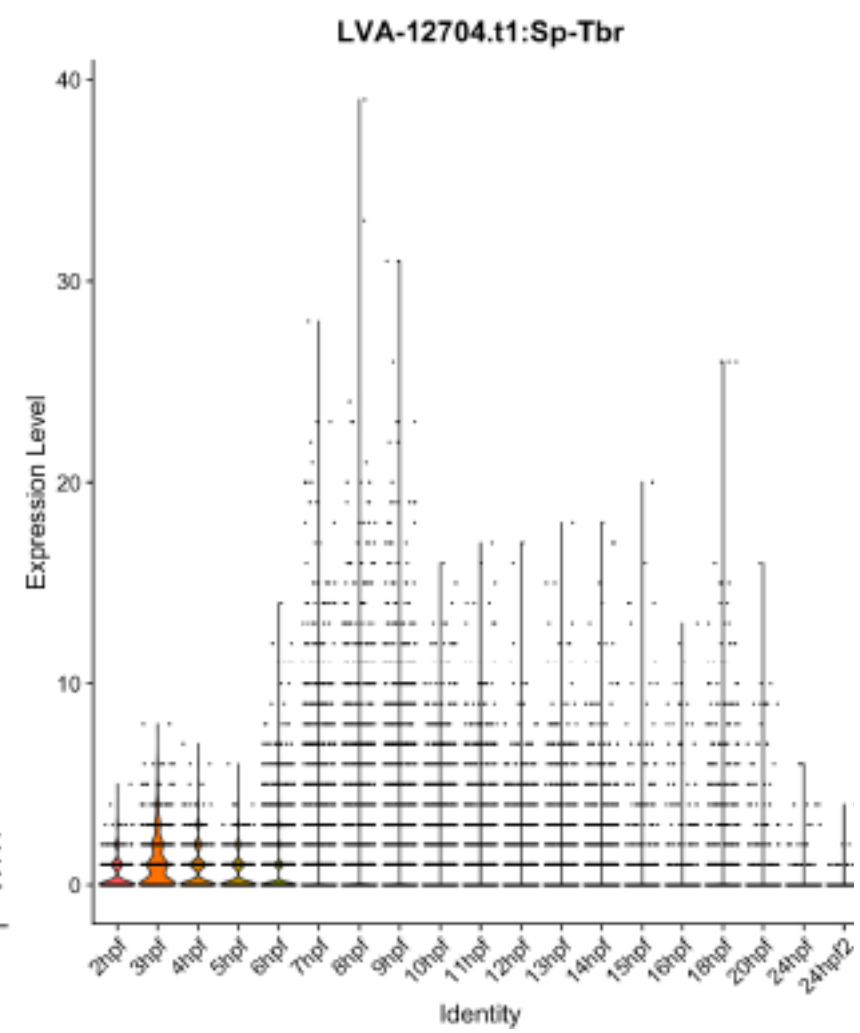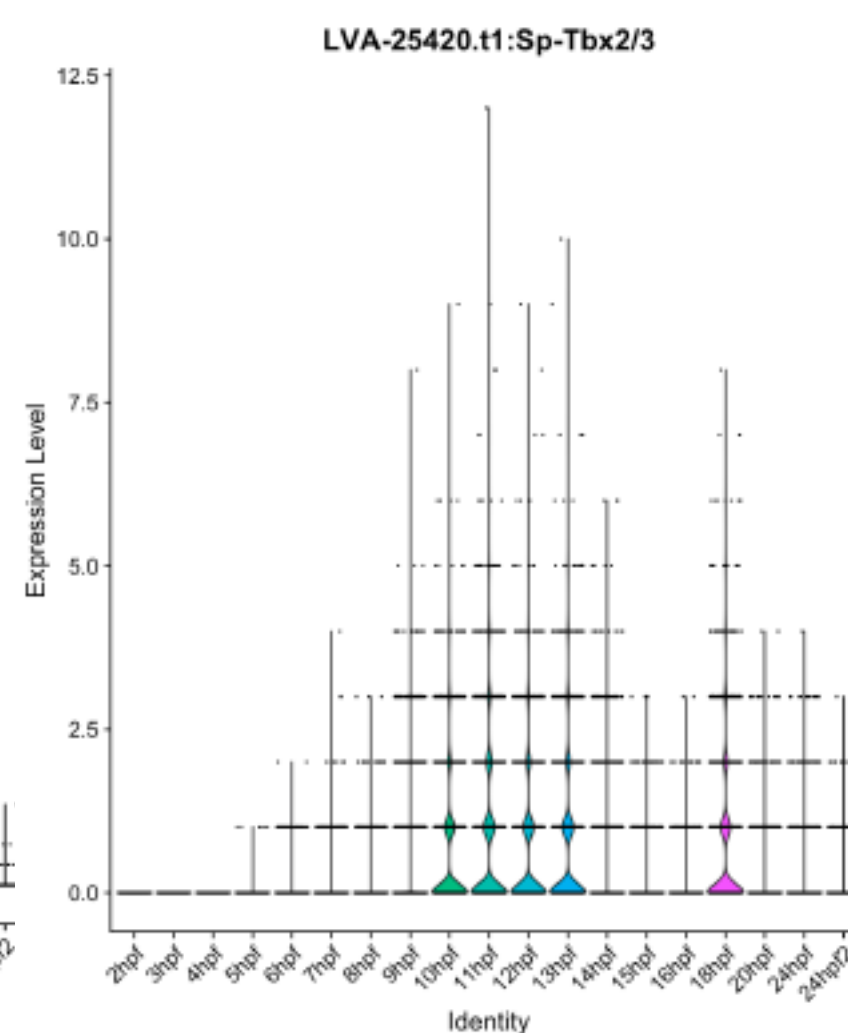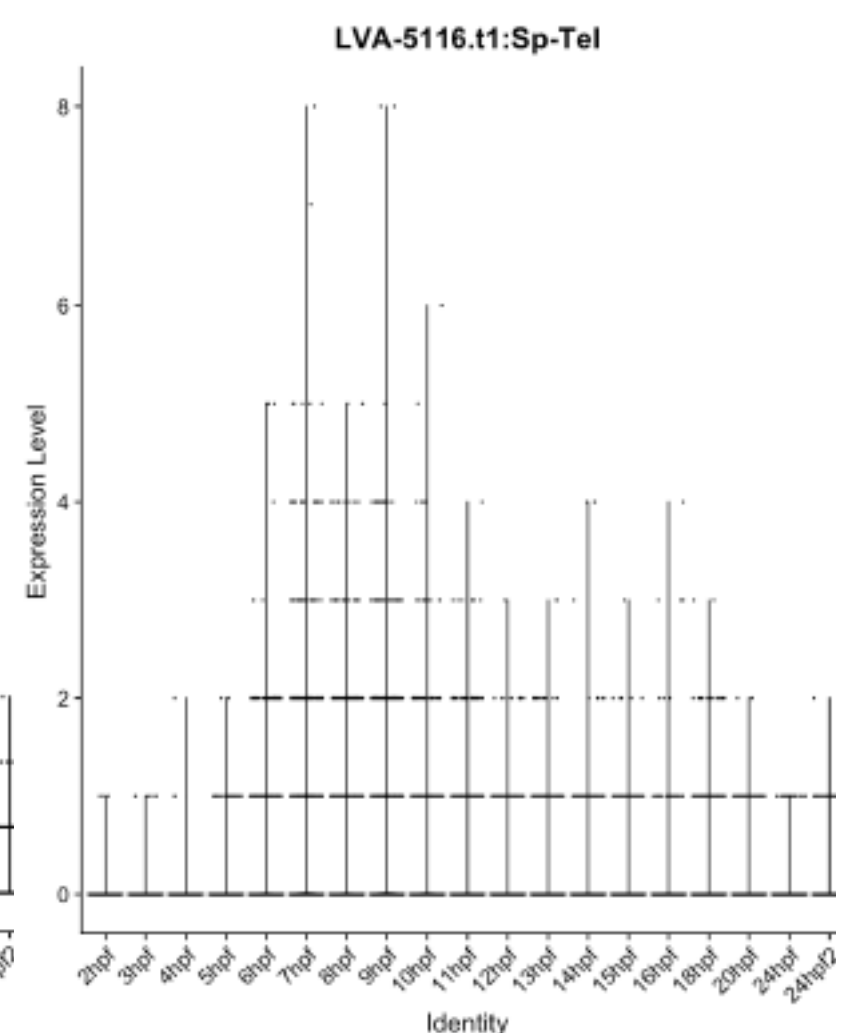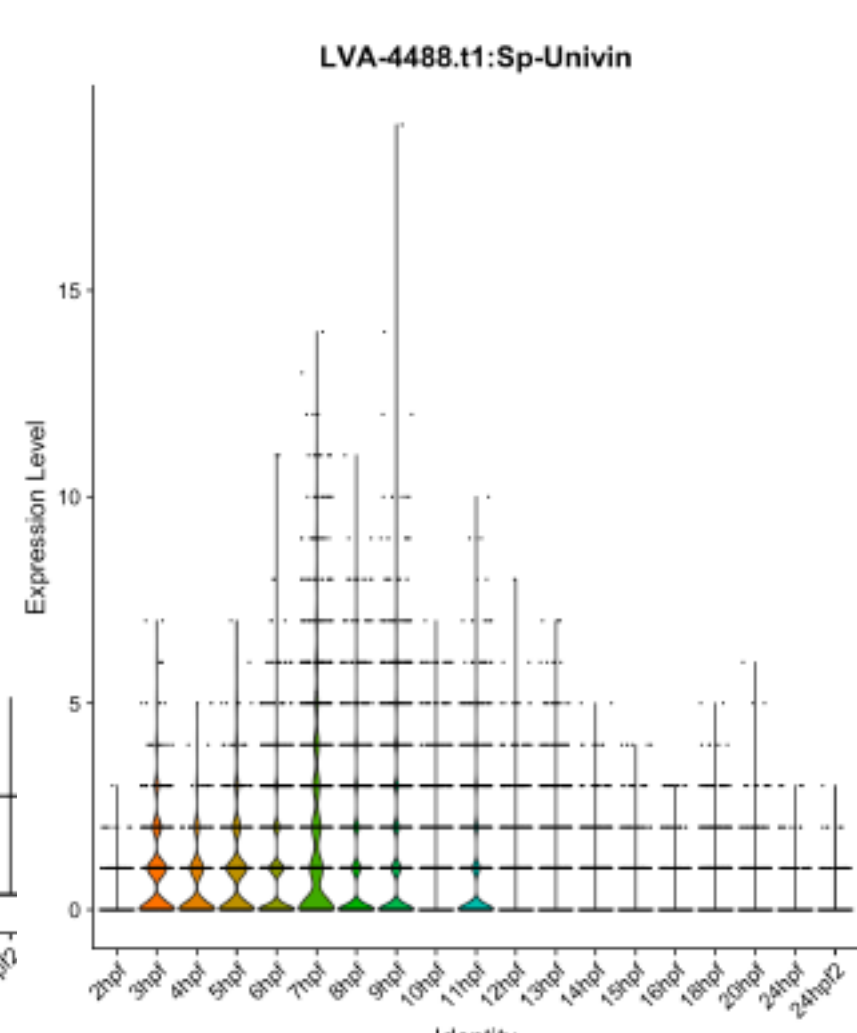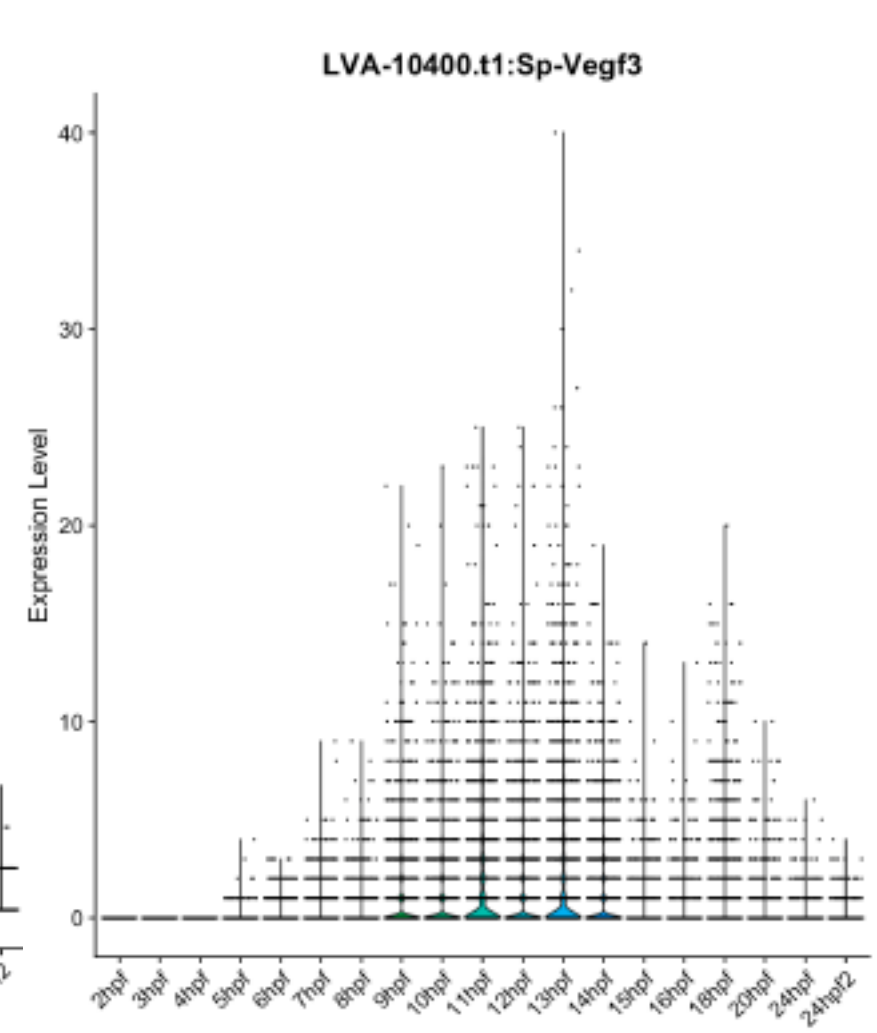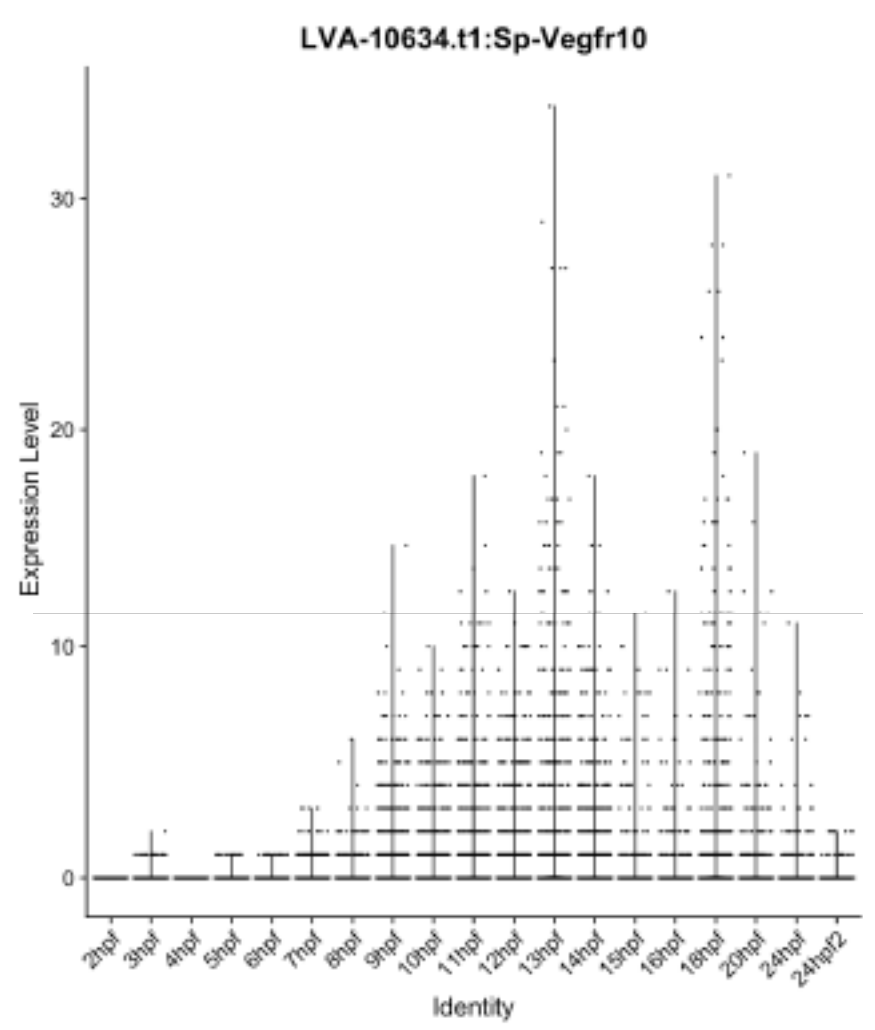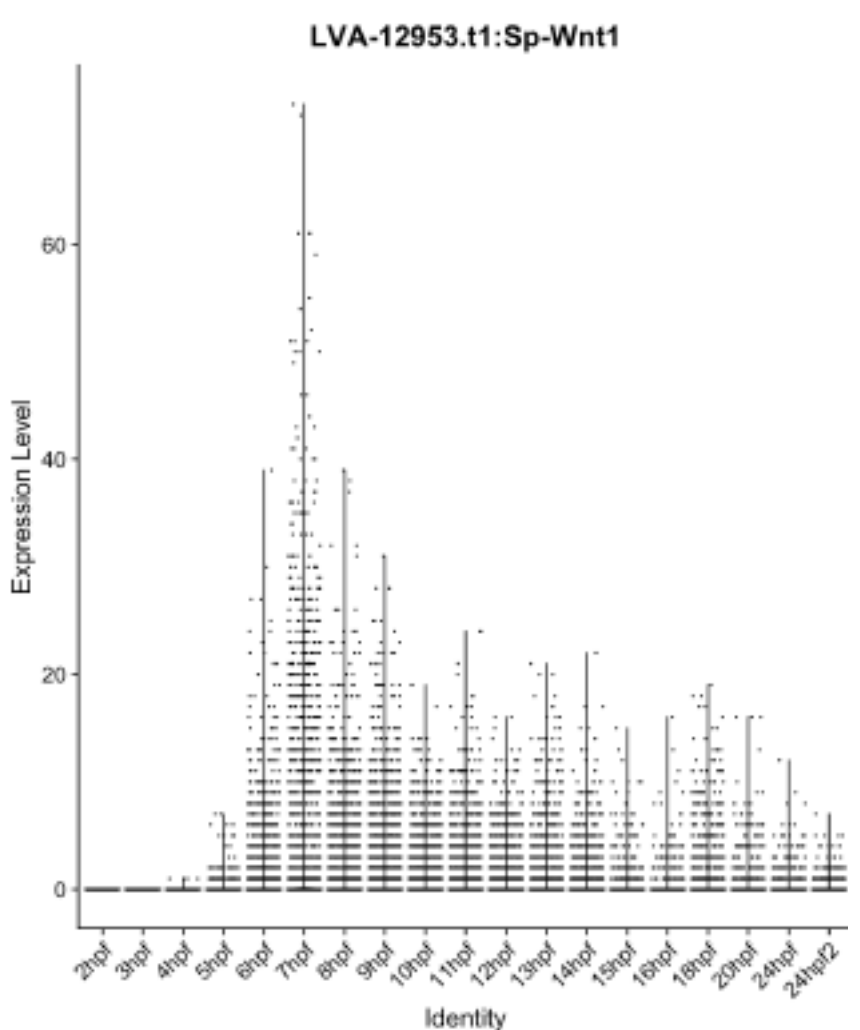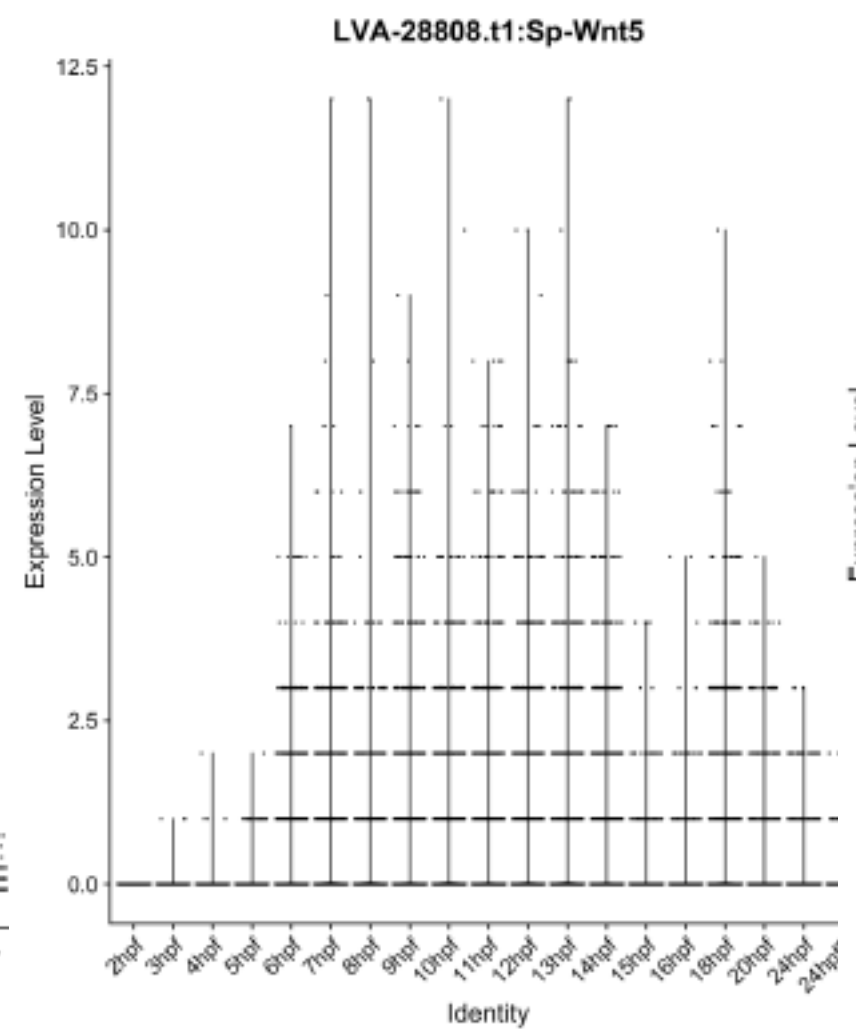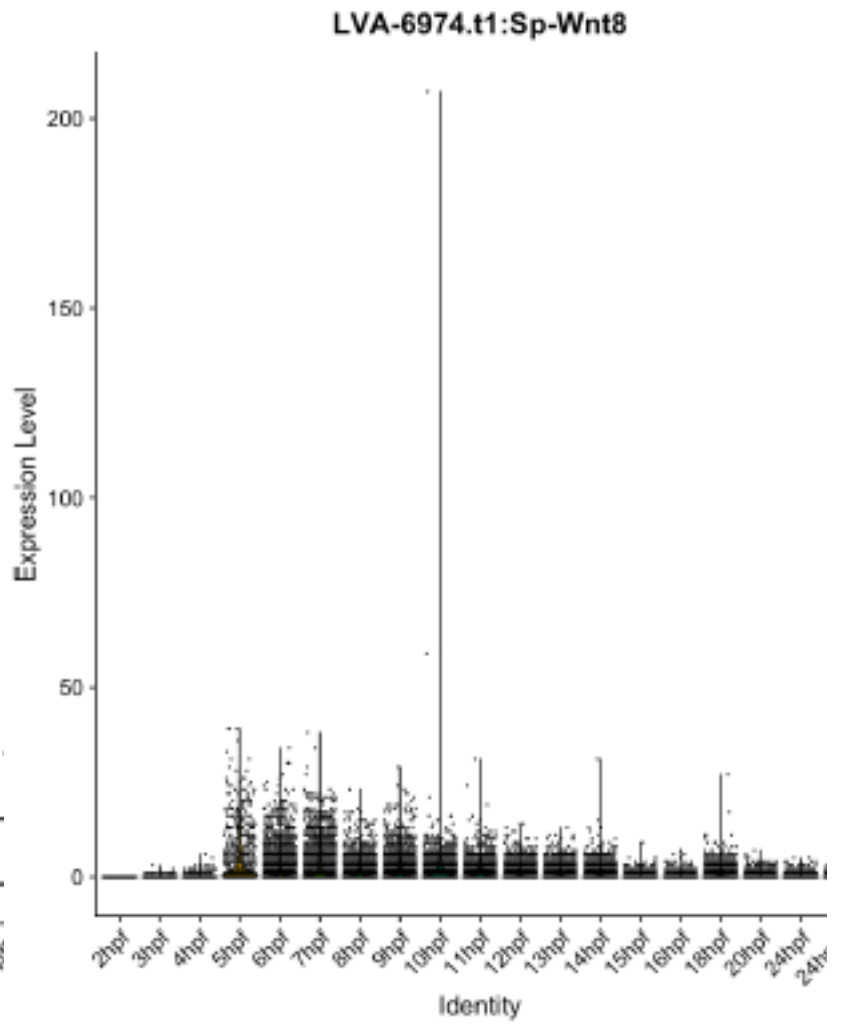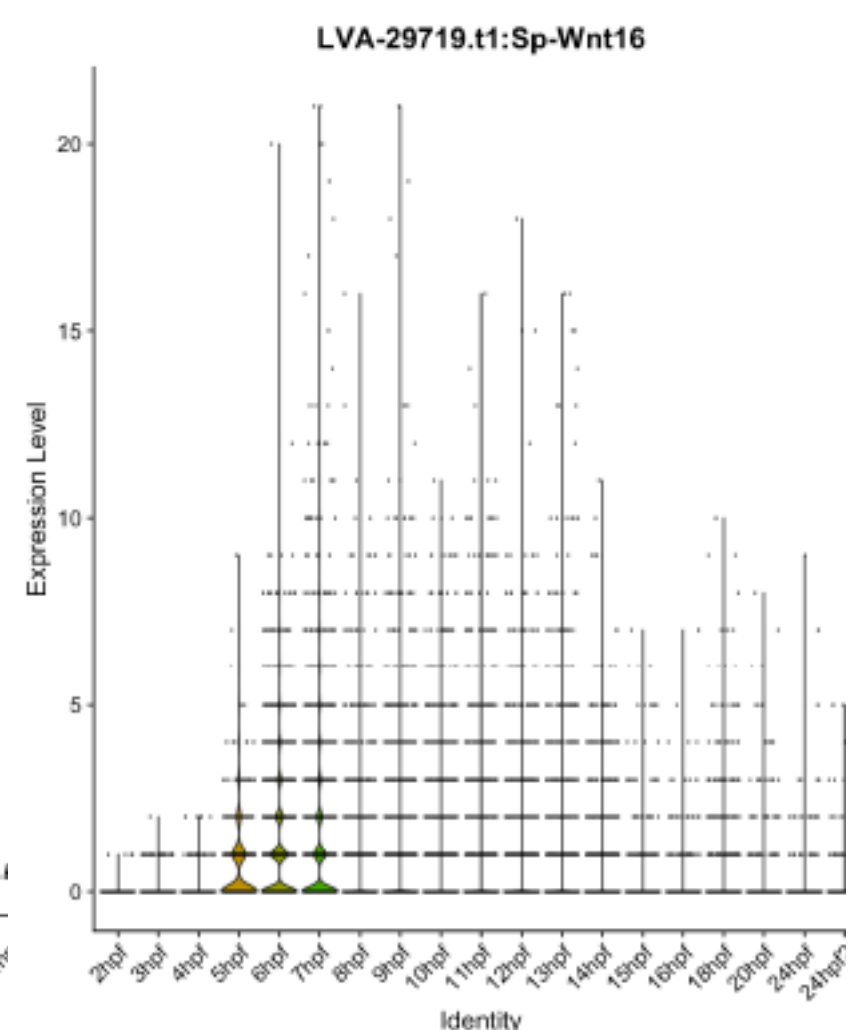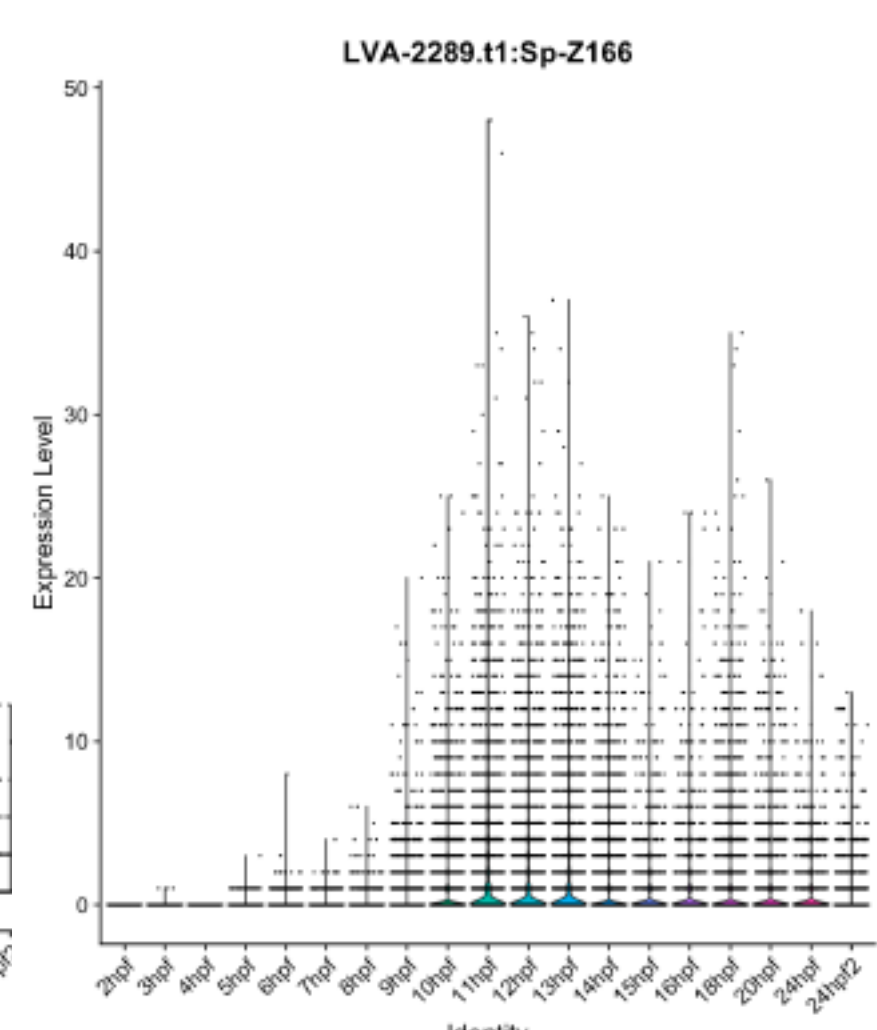

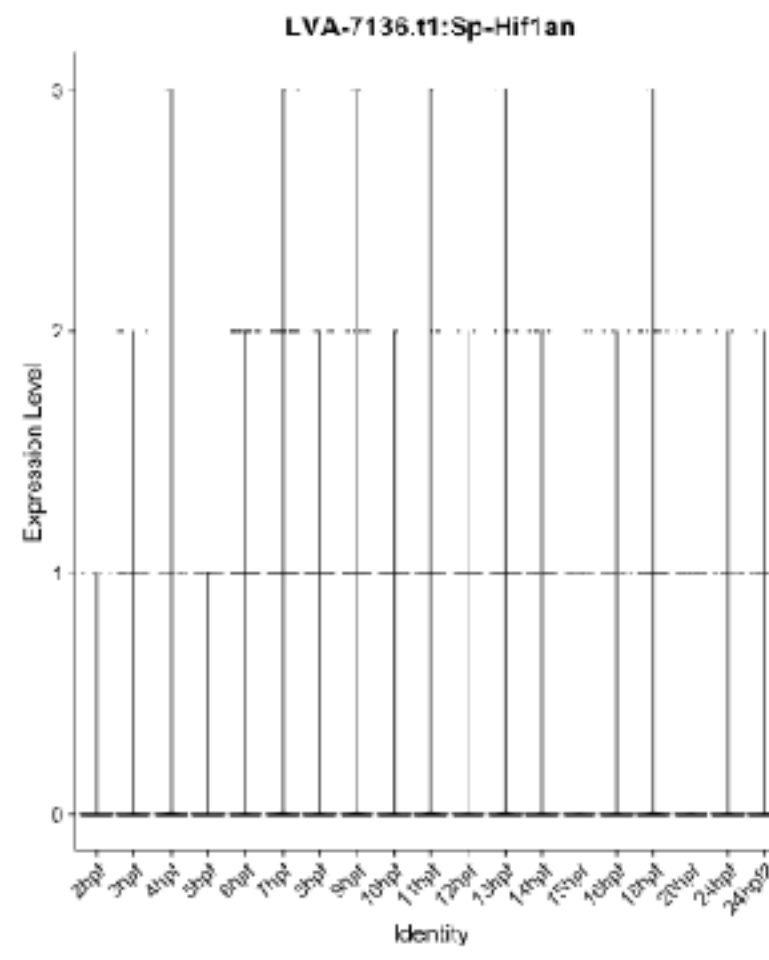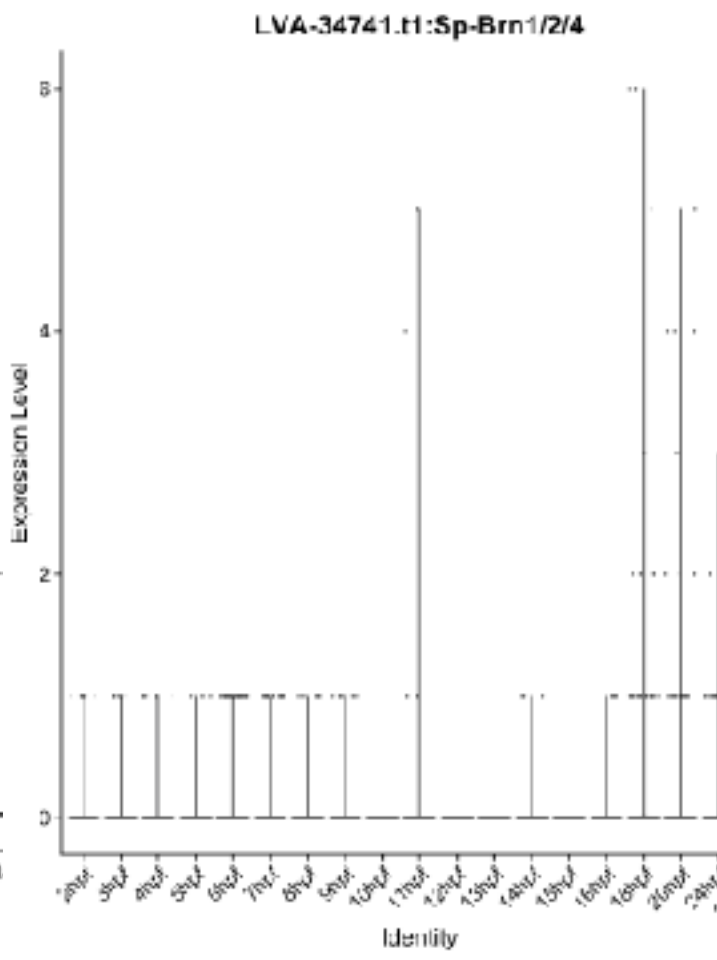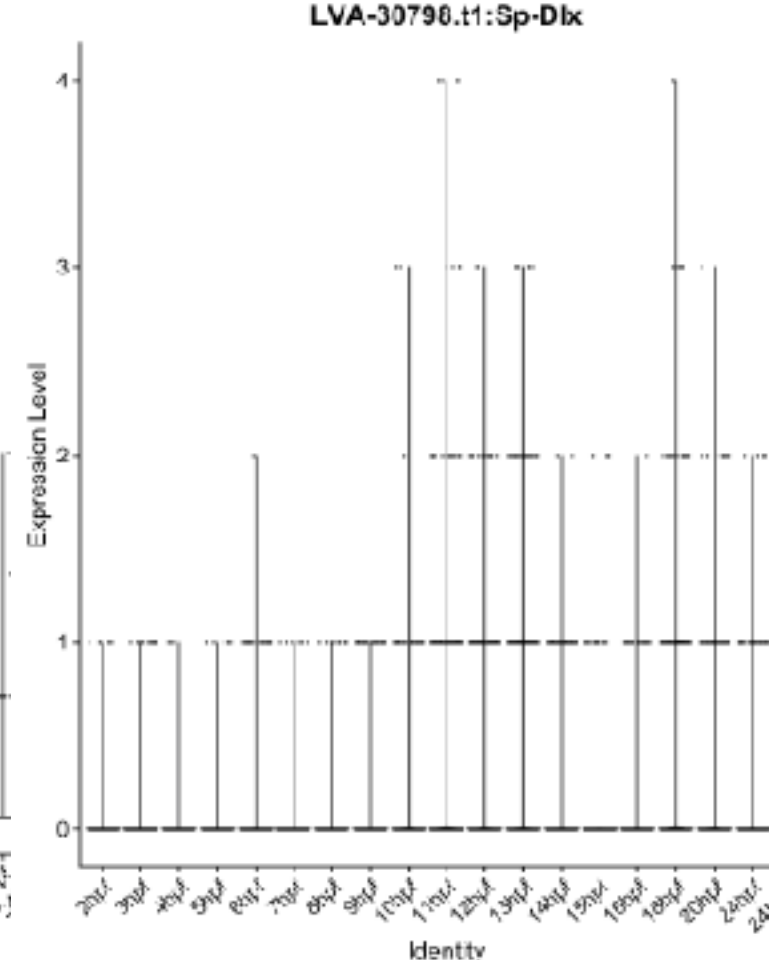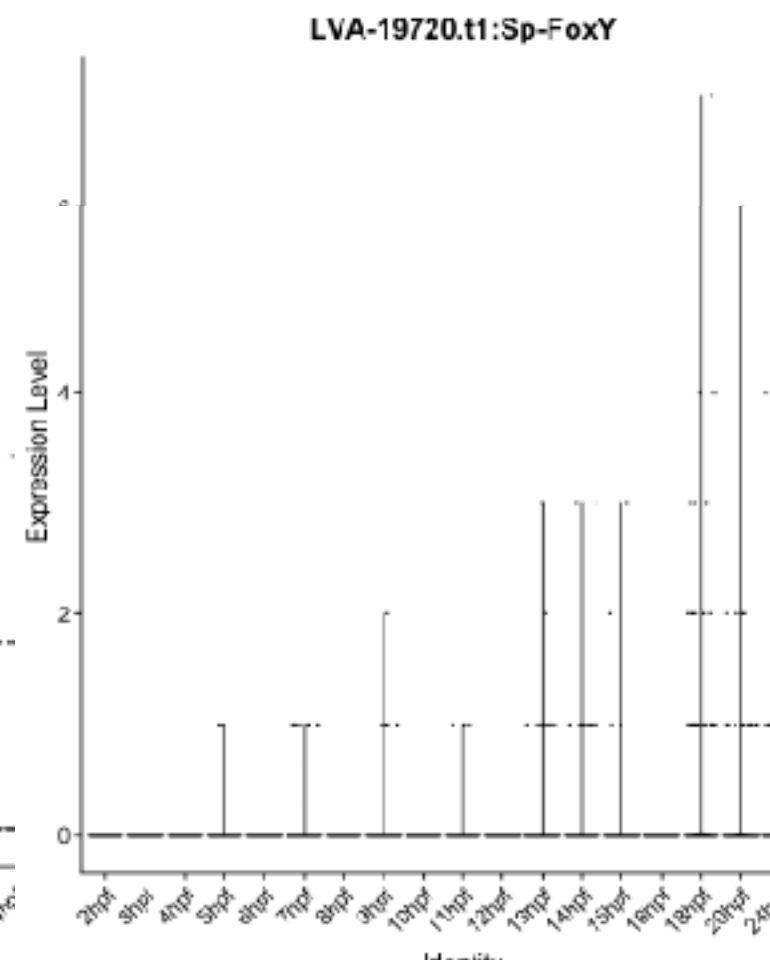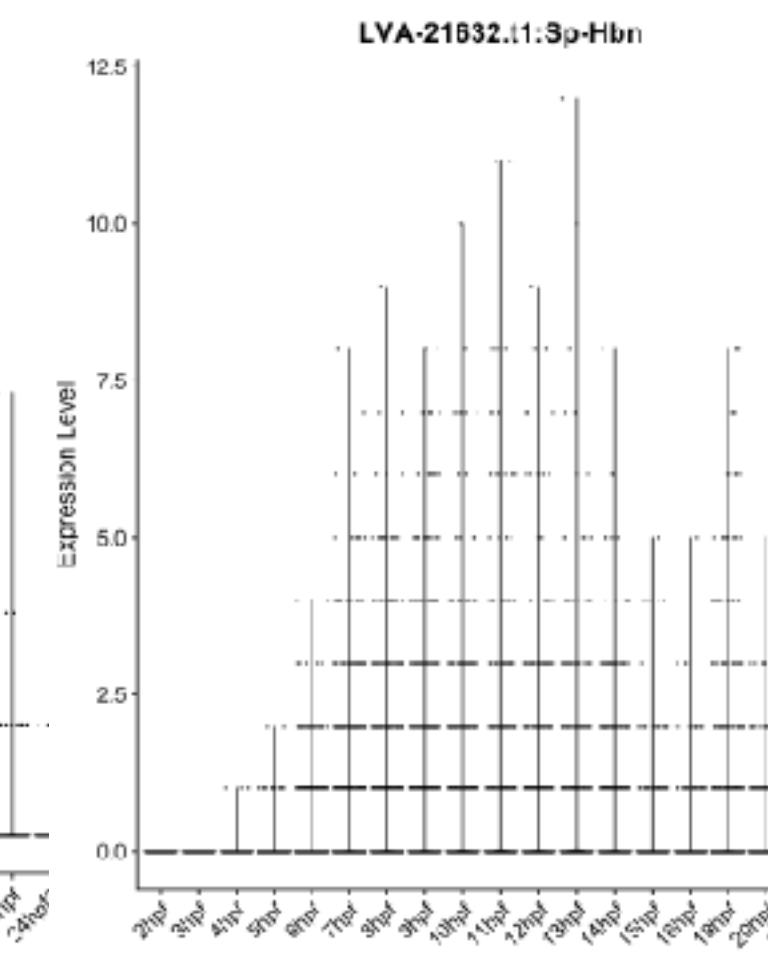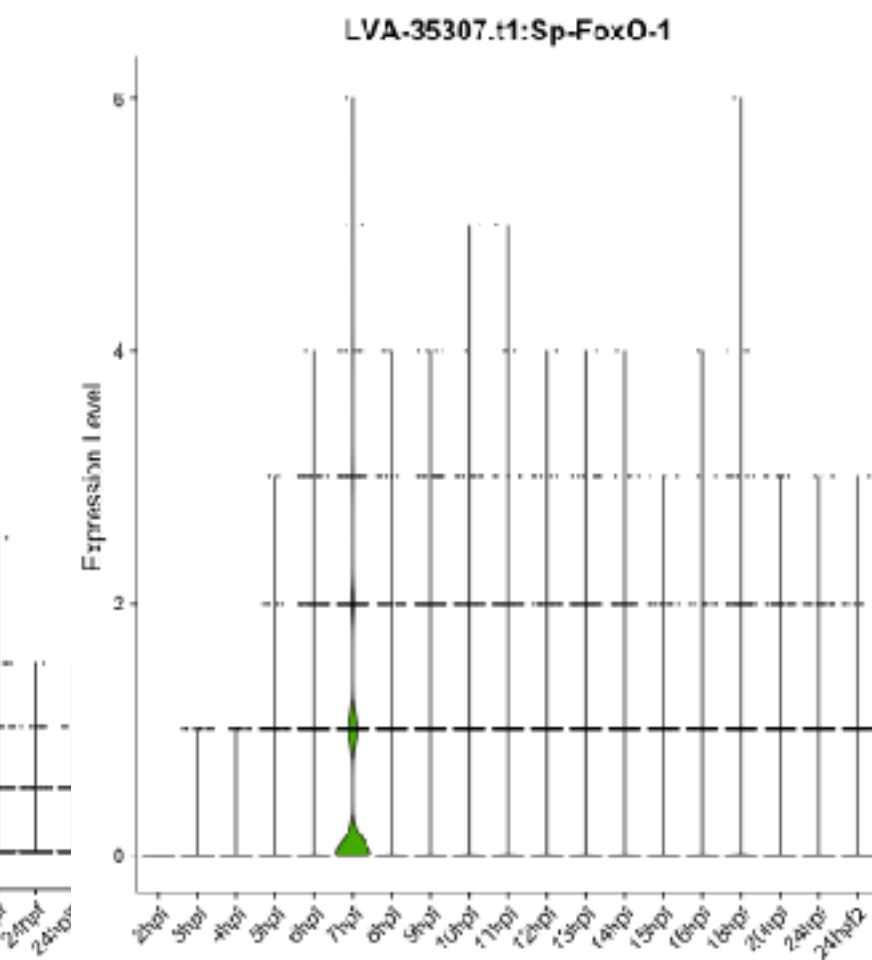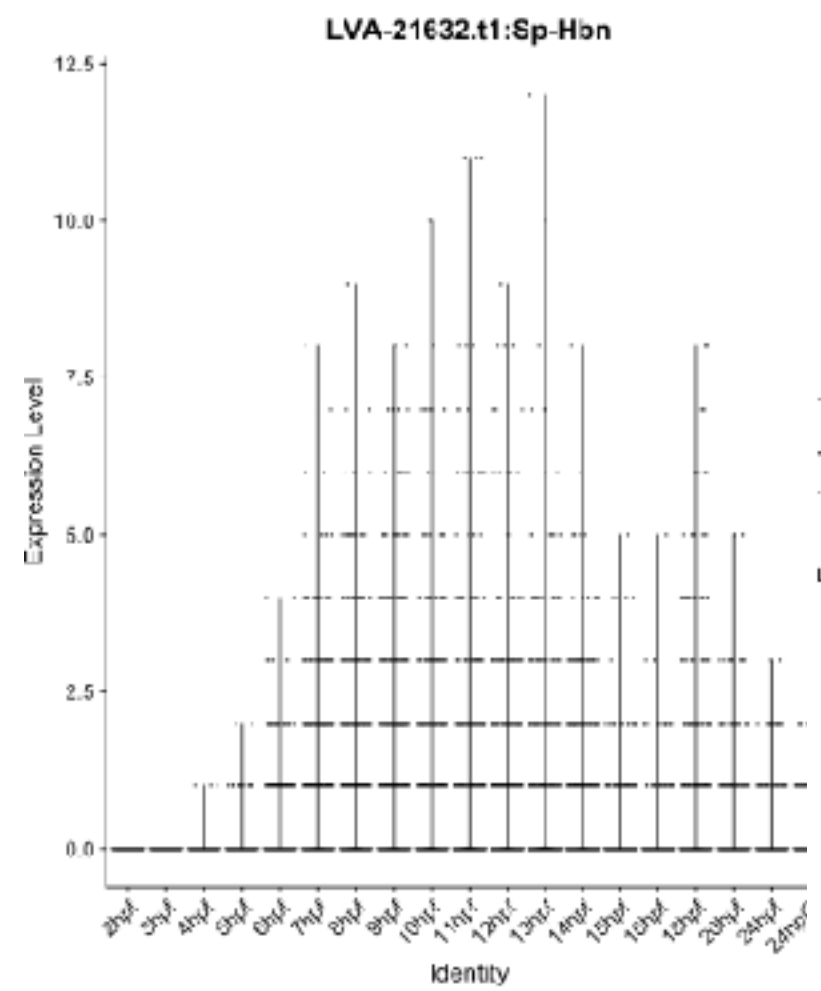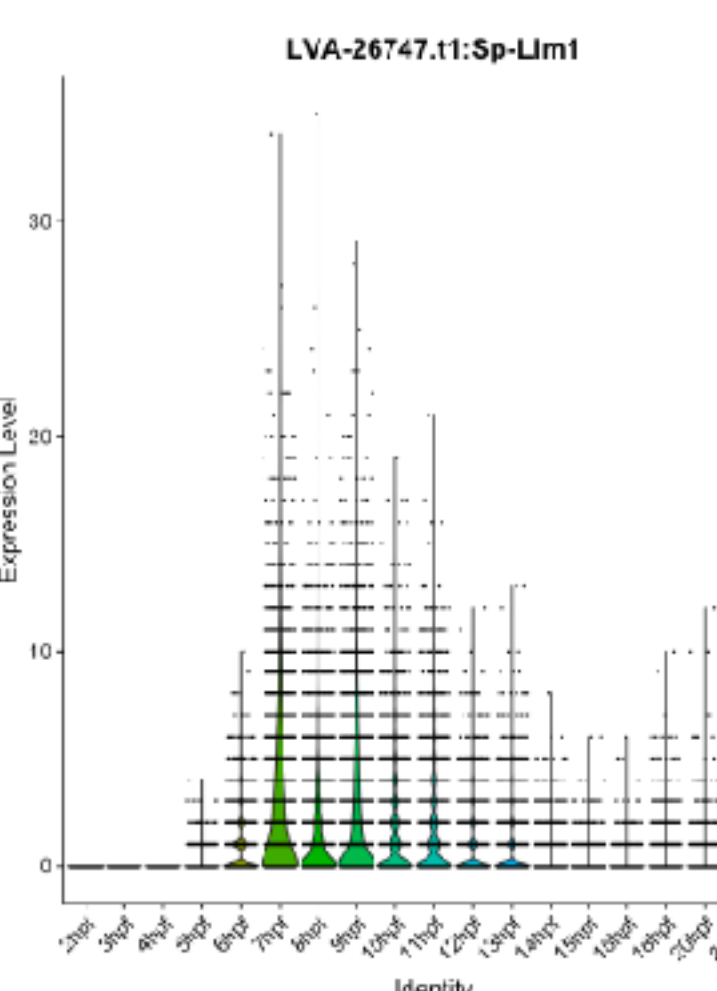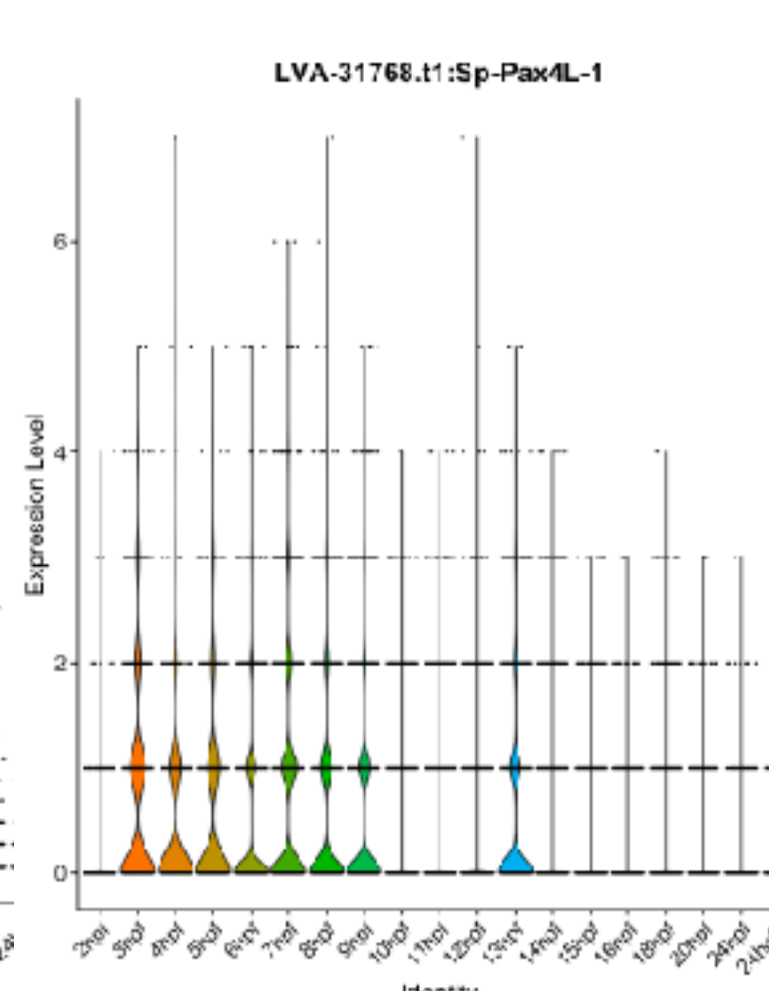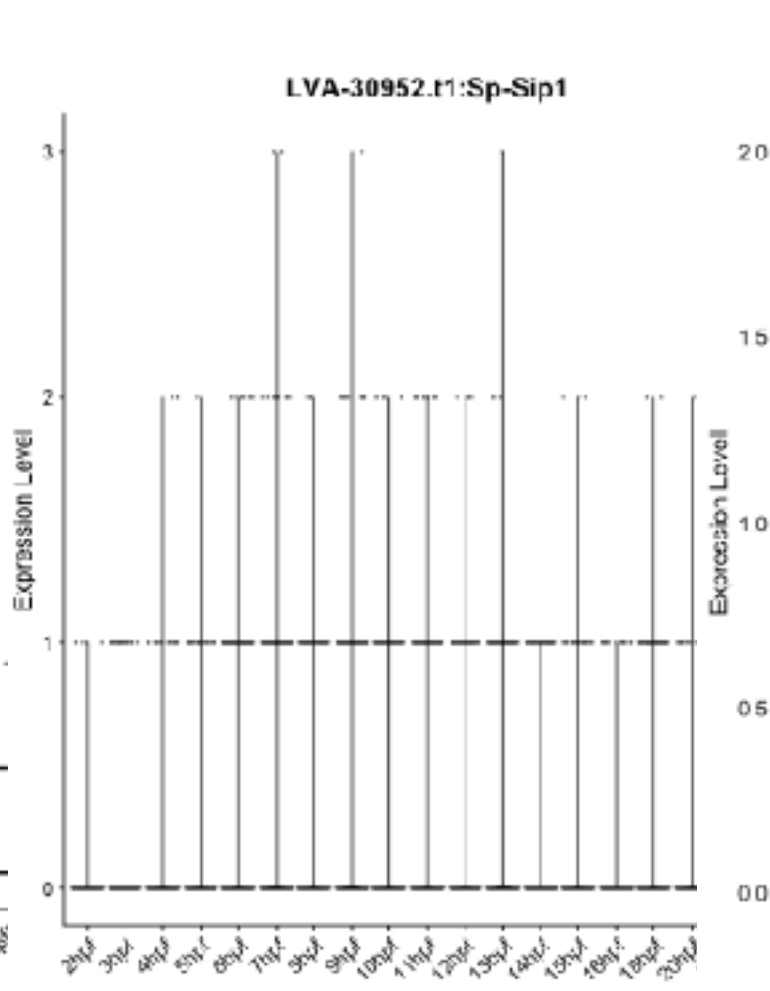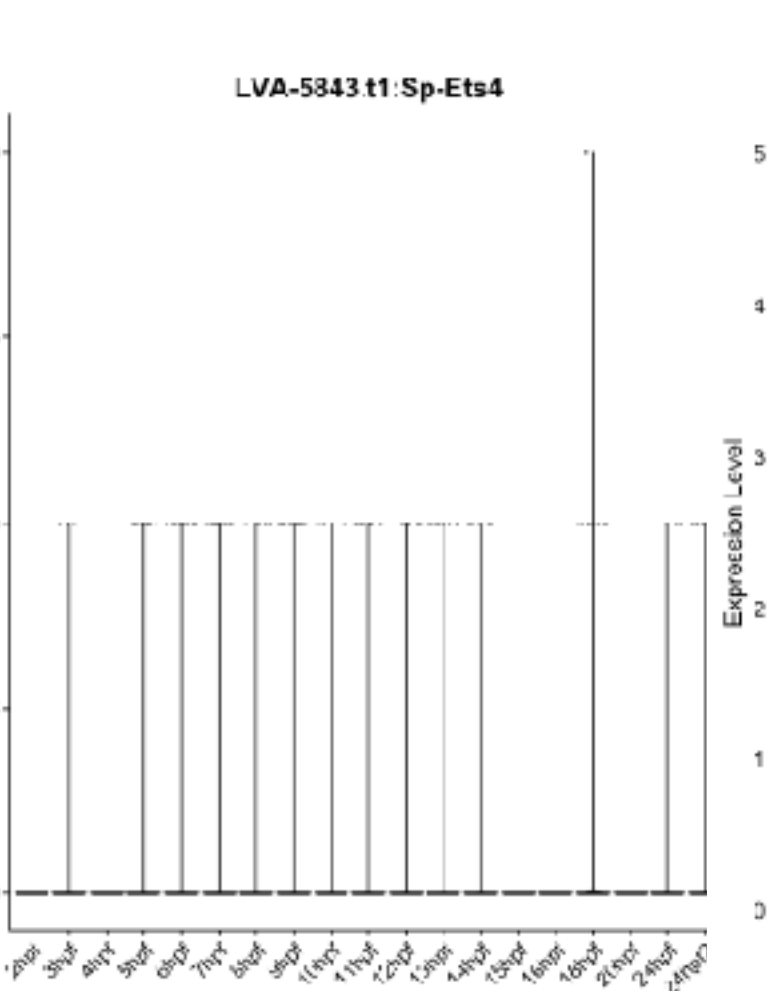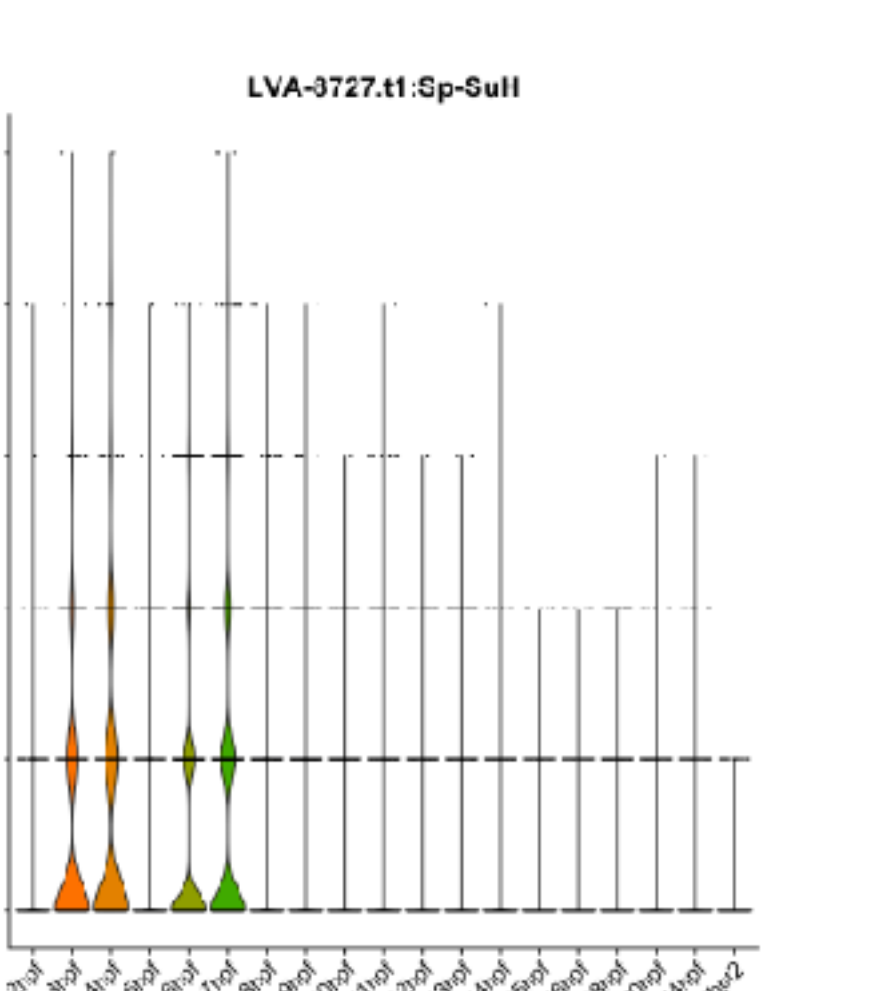

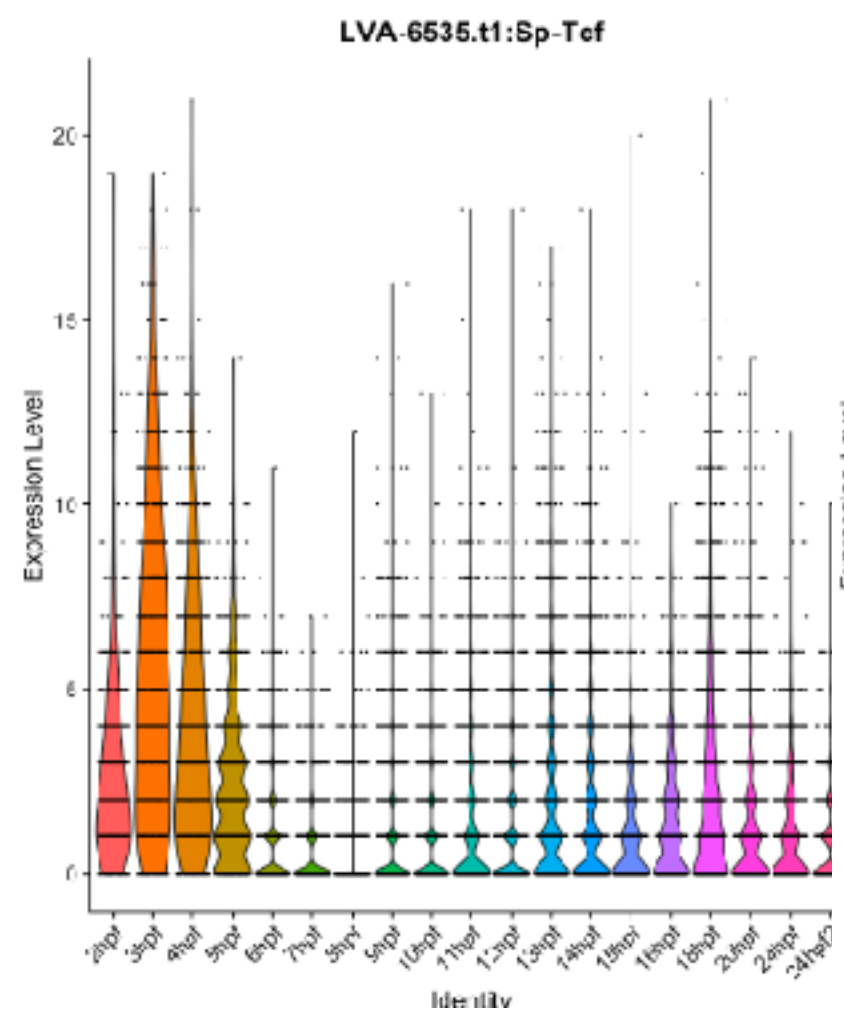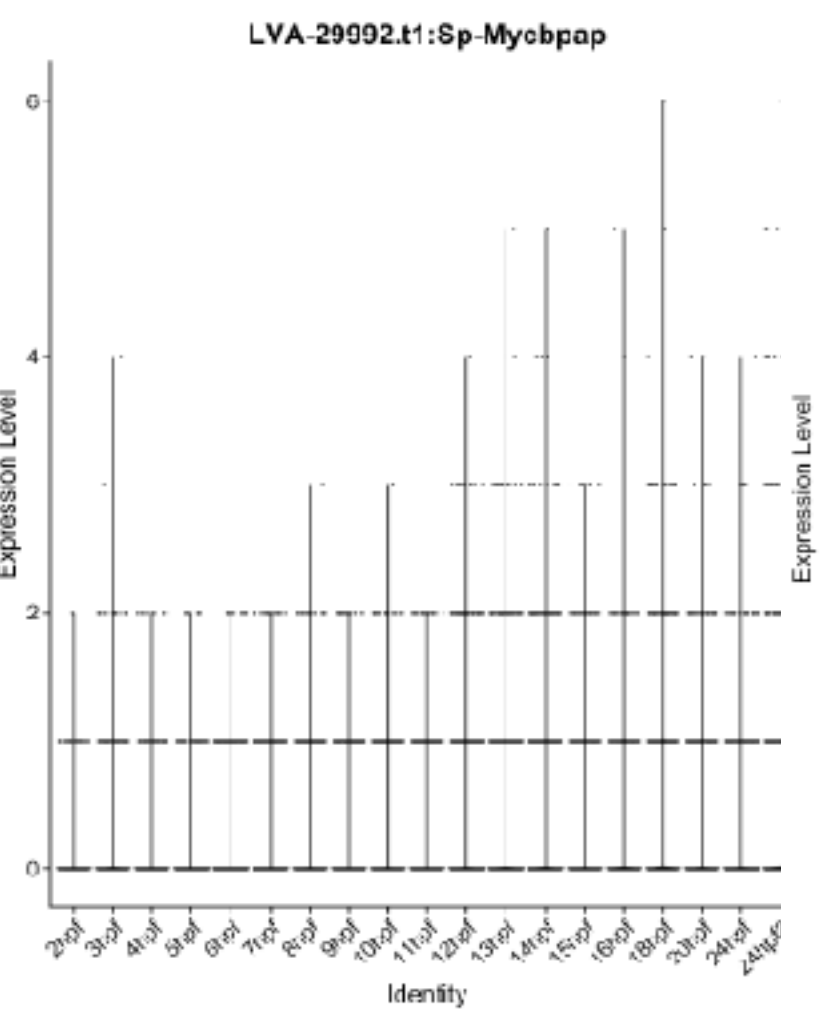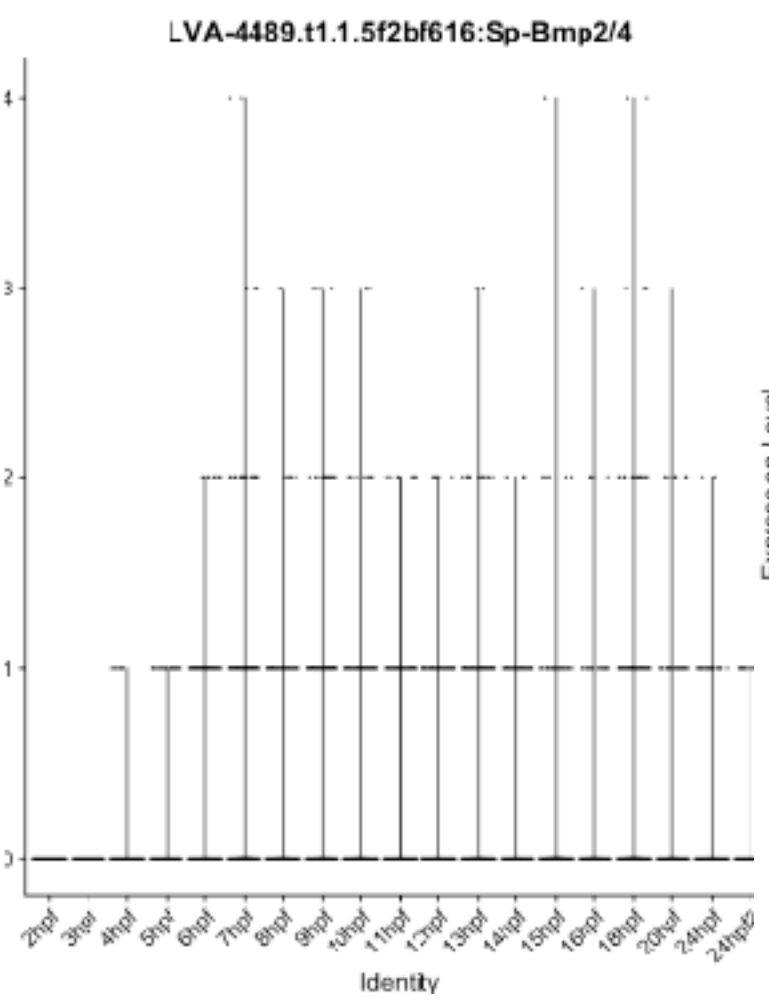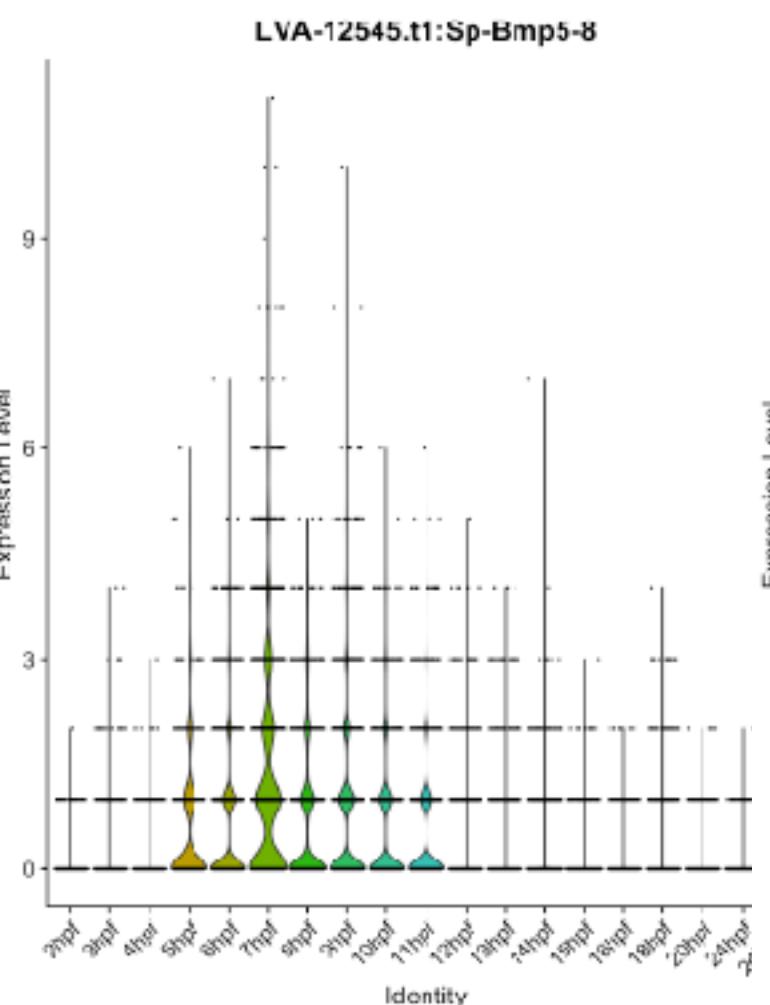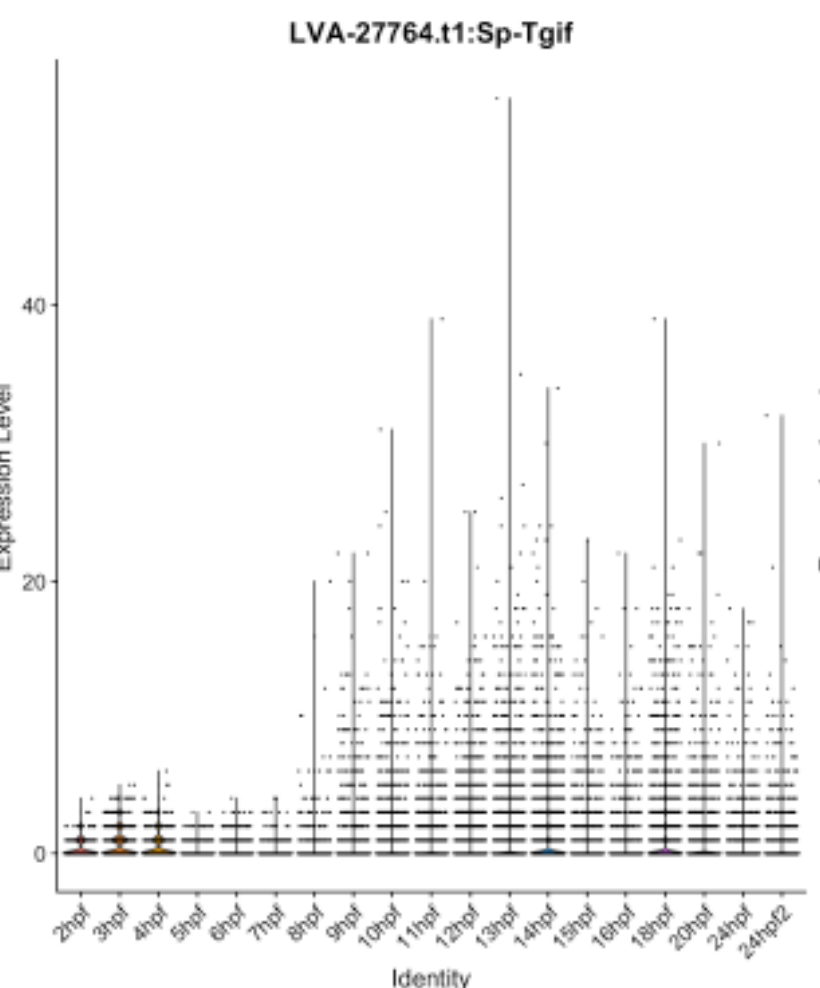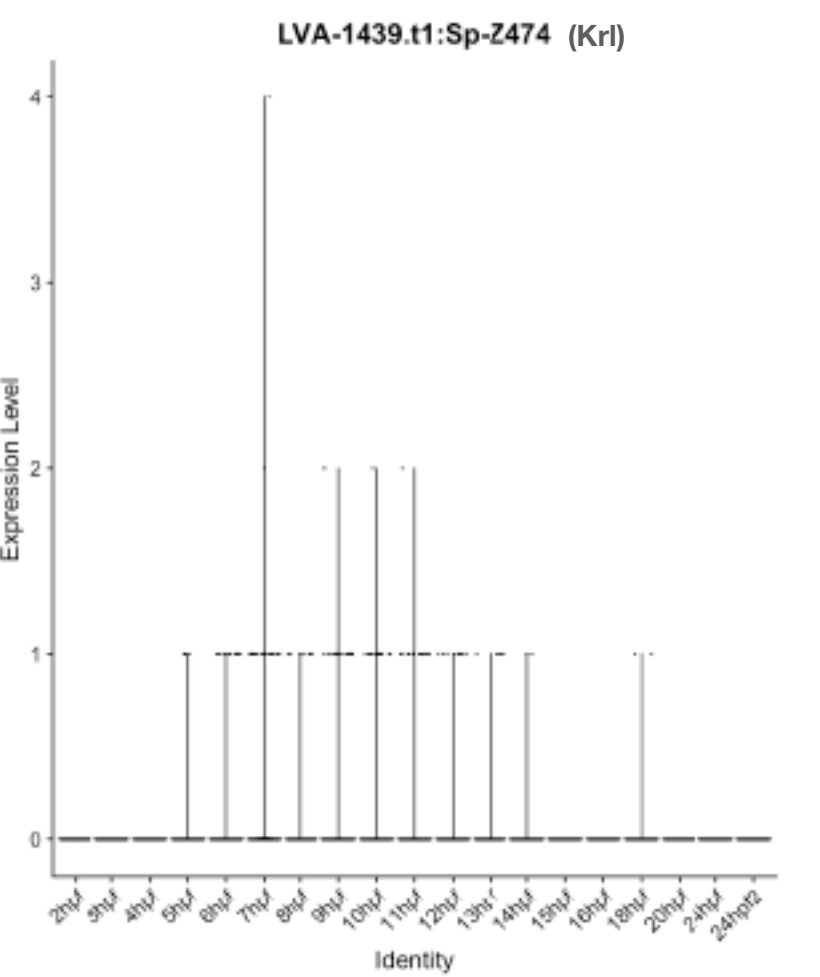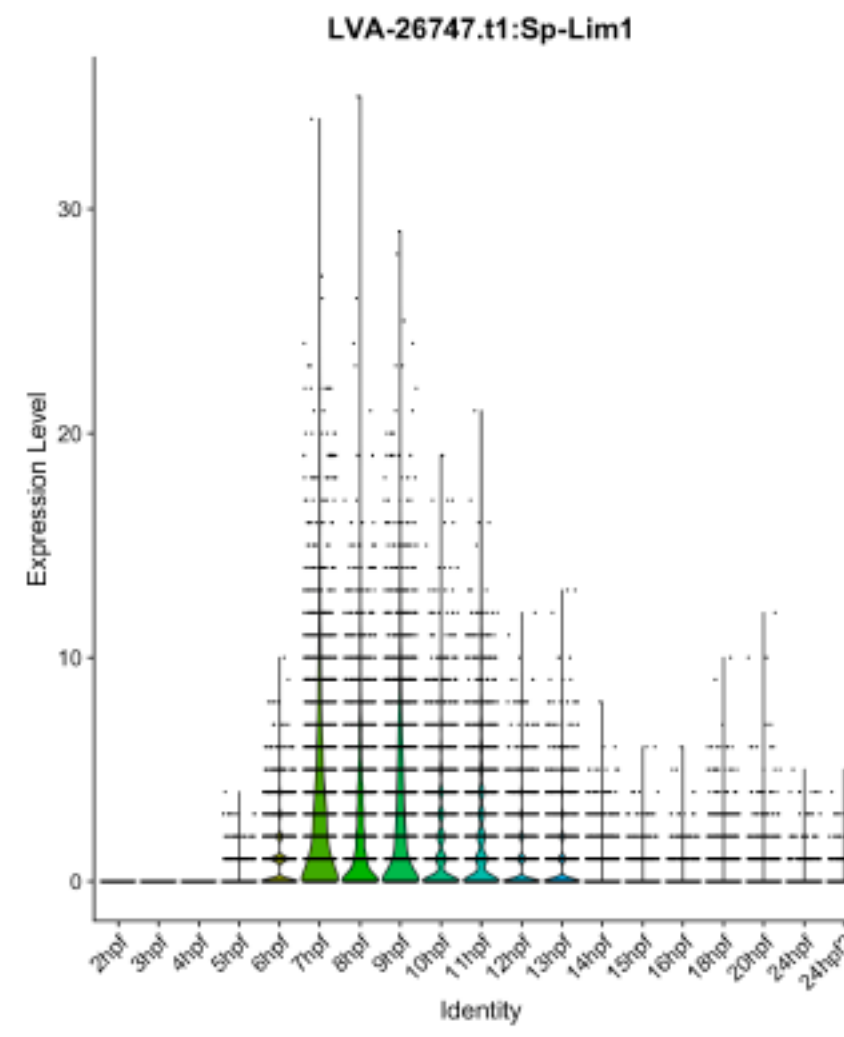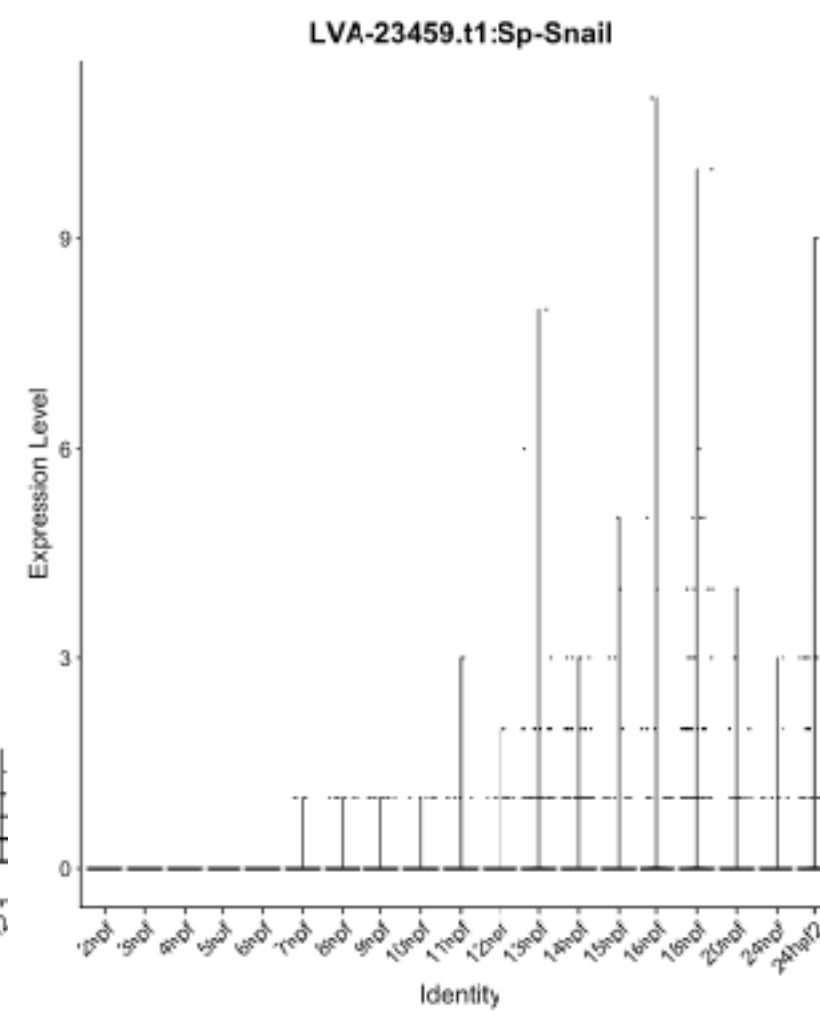

Supplement: 13227_2023_214_MOESM1_ESM.pdf [file 13227_2023_214_MOESM1_ESM.pdf]
