# Supplementary material for: Feedback circuits are numerous in embryonic gene regulatory networks and offer a stabilizing influence on evolution of those networks
Source: PubMed Central journal article supplement (PMC10273620; doi:10.1186/s13227-023-00214-y), 2023-06-16
Supplement: 13227_2023_214_MOESM5_ESM.pdf [file 13227_2023_214_MOESM5_ESM.pdf]

| List     | Name       | ID          | Time hr  |          |              |             |          |           |             |             |          |
|----------|------------|-------------|----------|----------|--------------|-------------|----------|-----------|-------------|-------------|----------|
| ectoderm | Sp-Hif1an  | L_var_26265 | 4 to 5   | ectoderm | Sp-Univin    | L_var_14095 | 4 to 5   | endomes   | Sp-Smo      | L_var_01467 | 4 to 5   |
| ectoderm | Sp-Tbx2/3  | L_var_04601 | 5 to 6   | ectoderm | Sp-Emx       | L_var_19379 | 4 to 5   | endomes   | Sp-Ptc      | L_var_19204 | 4 to 5   |
| ectoderm | Sp-Hmx     | L_var_19923 | 4 to 5   | ectoderm | Sp-Pax4L_1   | L_var_07423 | 2 to 3   | endomes   | Sp-Endo16   | L_var_26583 | 9 to 10  |
| ectoderm | Sp-Hox7    | L_var_06457 | 10 to 11 | ectoderm | Sp-Lefty     | L_var_12953 | 2 to 3   | endomes   | Sp-Z166     | L_var_23249 | 7 to 8   |
| ectoderm | Sp-Msx     | L_var_20199 | 5 to 6   | ectoderm | Sp-Vegf3     | L_var_00379 | 5 to 6   | endomes   | Sp-SuH      | L_var_12277 | 2 to 3   |
| ectoderm | Sp-IrxA    | L_var_03396 | 7 to 8   | ectoderm | Sp-Wnt5      | L_var_07687 | 4 to 5   | endomes   | Sp-Brn1/2/4 | L_var_09396 | 2 to 3   |
| ectoderm | Sp-Dlx     | L_var_06655 | 8 to 9   | ectoderm | Sp-Eve       | L_var_06470 | 3 to 4   | endomes   | Sp-Pks1     | L_var_23510 | 6 to 7   |
| ectoderm | Sp-Bmp2/4  | L_var_14096 | 2 to 3   | ectoderm | Sp-Onecut    | L_var_11694 | 4 to 5   | micromere | Sp-Otx      | L_var_13089 | 2 to 3   |
| ectoderm | Sp-Chordin | L_var_21972 | 4 to 5   | ectoderm | Sp-Fgfr      | L_var_19622 | 2 to 3   | micromere | Sp-Tcf      | L_var_25806 | 2 to 3   |
| ectoderm | Sp-Dr_1    | L_var_11305 | 11 to 12 | endomes  | Sp-SoxB1     | L_var_24060 | 2 to 3   | micromere | Sp-Pmar1a   | L_var_04869 | 2 to 3   |
| ectoderm | Sp-E2f3    | L_var_02778 | 4 to 5   | endomes  | Sp-Hox11/13b | L_var_06463 | 4 to 5   | micromere | Sp-HesC     | L_var_22399 | 2 to 3   |
| ectoderm | Sp-FoxG    | L_var_14141 | 7 to 8   | endomes  | Sp-Notch     | L_var_22864 | 2 to 3   | micromere | Sp-Blimp1   | L_var_08699 | 4 to 5   |
| ectoderm | Sp-FoxJ1   | L_var_17068 | 2 to 3   | endomes  | Sp-Gatae     | L_var_01834 | 5 to 6   | micromere | Sp-Ets1/2   | L_var_14420 | 2 to 3   |
| ectoderm | Sp-Gsc     | L_var_13092 | 3 to 4   | endomes  | Sp-FoxA      | L_var_14241 | 6 to 7   | micromere | Sp-Tbr      | L_var_02106 | 2 to 3   |
| ectoderm | Sp-HesC    | L_var_22399 | 2 to 3   | endomes  | Sp-Bra       | L_var_08961 | 6 to 7   | micromere | Sp-Wnt8     | L_var_26156 | 3 to 4   |
| ectoderm | Sp-Hlf     | L_var_00415 | 2 to 3   | endomes  | Sp-Mycbpap   | L_var_06005 | 2 to 3   | micromere | Sp-Alx1     | L_var_16422 | 4 to 5   |
| ectoderm | Sp-Lhx2    | L_var_23544 | 8 to 9   | endomes  | Sp-Hh        | L_var_06155 | 10 to 11 | micromere | Sp-Delta    | L_var_13663 | 3 to 4   |
| ectoderm | Sp-Lim1    | L_var_05622 | 5 to 6   | endomes  | Sp-Hnf1_1    | L_var_05010 | 8 to 9   | micromere | Sp-Tel      | L_var_15978 | 5 to 6   |
| ectoderm | Sp-Nk1     | L_var_19924 | 8 to 9   | endomes  | Sp-Not       | L_var_19596 | 4 to 5   | micromere | Sp-Erg      | L_var_14555 | 4 to 5   |
| ectoderm | Sp-Nkx2-2  | L_var_13912 | 4 to 5   | endomes  | Sp-Ese       | L_var_15967 | 4 to 5   | micromere | Sp-Hexb     | L_var_10982 | 2 to 3   |
| ectoderm | Sp-Nodal   | L_var_26144 | 4 to 5   | endomes  | Sp-Prox1     | L_var_13096 | 6 to 7   | micromere | Sp-Tgif     | L_var_25470 | 7 to 8   |
| ectoderm | Sp-Sip1    | L_var_06794 | 2 to 3   | endomes  | Sp-Six1/2    | L_var_13791 | 9 to 10  | micromere | Sp-FoxN2/3  | L_var_13332 | 4 to 5   |
| ectoderm | Sp-Klf7    | L_var_02281 | 5 to 6   | endomes  | Sp-Gcm       | L_var_24790 | 4 to 5   | micromere | Sp-Dr_1     | L_var_11305 | 5 to 6   |
| ectoderm | Sp-Ets4    | L_var_16442 | 2 to 3   | endomes  | Sp-Runt1     | L_var_08861 | 4 to 5   | micromere | Sp-FoxB     | L_var_10986 | 9 to 10  |
| ectoderm | Sp-FoxQ2_1 | L_var_17031 | 4 to 5   | endomes  | Sp-GataC     | L_var_07655 | 7 to 8   | micromere | Sp-FoxO_1   | L_var_09670 | 10 to 11 |
| ectoderm | Sp-Six3    | L_var_13793 | 4 to 5   | endomes  | Sp-Scl       | L_var_18807 | 7 to 8   | micromere | Sp-Snail    | L_var_03074 | 6 to 7   |
|          |            |             |          | endomes  | Sp-FoxY      | L_var_09987 | 7 to 8   |           |             |             |          |
