# Supplementary material for: Feedback circuits are numerous in embryonic gene regulatory networks and offer a stabilizing influence on evolution of those networks
Source: PubMed Central journal article supplement (PMC10273620; doi:10.1186/s13227-023-00214-y), 2023-06-16
Supplement: 13227_2023_214_MOESM6_ESM.pdf [file 13227_2023_214_MOESM6_ESM.pdf]

| Mean qPCR Cq Values (3 Replicates) for Lv Gene Expression Timecourse |       |       |       |       |       |       |       |       |       |       |       |       |  |
|----------------------------------------------------------------------|-------|-------|-------|-------|-------|-------|-------|-------|-------|-------|-------|-------|--|
| Gene                                                                 | 0 hr  | 2 hr  | 3 hr  | 4 hr  | 5 hr  | 6 hr  | 7 hr  | 8 hr  | 9 hr  | 10 hr | 11 hr | 12 hr |  |
| Ets                                                                  | 18.57 | 19.39 | 19.61 | 20.27 | 19.82 | 19.83 | 20.43 | 22.04 | 21.36 | 21.93 | 23.13 | 21.95 |  |
| Eve                                                                  | 34.71 | 32.91 | 28.28 | 24.65 | 22.63 | 21.65 | 22.1  | 22.65 | 21.1  | 21.46 | 21.79 | 20.93 |  |
| FoxA                                                                 | 30.04 | 30.39 | 30.19 | 29.94 | 28.57 | 27.7  | 26.54 | 24.35 | 21.66 | 21.84 | 21.85 | 20.34 |  |
| FoxB                                                                 | 33.28 | 32.38 | 33.37 | 33.7  | 32.65 | 31.1  | 31.69 | 31.93 | 32.3  | 32.35 | 30.67 | 26.69 |  |
| GATAc                                                                | 32.72 | 32.9  | 32.76 | 33.16 | 33.26 | 32.66 | 28.81 | 27.84 | 26.32 | 24.67 | 24.14 | 22.62 |  |
| Gcm                                                                  | 29.76 | 30.16 | 30.55 | 28.31 | 24.95 | 23.31 | 22.36 | 21.59 | 20.59 | 21.06 | 21.74 | 21.7  |  |
| Gsc                                                                  | 31.12 | 31.68 | 31.51 | 31.88 | 28.75 | 27.43 | 28.57 | 27.06 | 26.25 | 25.61 | 25.29 | 24.11 |  |
| Hnf6                                                                 | 21.45 | 21.98 | 22.17 | 22.75 | 22.33 | 22.05 | 21.34 | 21.75 | 20.44 | 21.64 | 23.82 | 22.5  |  |
| Msp130                                                               | 41.25 | 45    | 42.57 | 39.15 | 34.28 | 32.2  | 25.26 | 22.77 | 19.51 | 19.18 | 19.48 | 17.11 |  |
| Nkx2.1                                                               | 32.4  | 33.58 | 33.43 | 32.65 | 28.07 | 24.52 | 23.46 | 24.04 | 22.84 | 23.69 | 25.47 | 23.67 |  |
| Nodal                                                                | 35.48 | 30.19 | 28.88 | 27.26 | 23.94 | 23.54 | 22.19 | 22.51 | 22.73 | 22.86 | 23.17 | 22.96 |  |
| Not                                                                  | 34.21 | 34.33 | 34.7  | 33.27 | 30.36 | 28.22 | 27.42 | 27.46 | 27.09 | 26.46 | 27.08 | 25.85 |  |
| Pks1                                                                 | 25.16 | 25.87 | 26    | 27.04 | 26.47 | 26.97 | 27.77 | 29.81 | 23.73 | 20.61 | 20.73 | 17.87 |  |
| Pmar1                                                                | 28.88 | 28.41 | 25.26 | 24.12 | 24.13 | 25.33 | 26.33 | 27.04 | 26.49 | 27.51 | 29.07 | 28.73 |  |
| SoxB1                                                                | 17.82 | 17.78 | 18.55 | 18.96 | 18.65 | 18.23 | 18.31 | 19.1  | 18.75 | 20.18 | 21.95 | 20.64 |  |
| SoxE                                                                 | 30.99 | 32.04 | 32.01 | 31.74 | 28.85 | 27.4  | 26.89 | 27.71 | 27.23 | 28.34 | 29.4  | 28.12 |  |
| Tbr                                                                  | 20.1  | 20.57 | 21.04 | 21.92 | 21.14 | 21.64 | 22.48 | 22.94 | 21.44 | 21.69 | 22.72 | 21.25 |  |
| Wnt8                                                                 | 34.66 | 34.04 | 29.4  | 24.71 | 22.27 | 20.81 | 20.51 | 21.16 | 20.45 | 20.78 | 21.56 | 20.67 |  |
