# Supplementary material for: Feedback circuits are numerous in embryonic gene regulatory networks and offer a stabilizing influence on evolution of those networks
Source: PubMed Central journal article supplement (PMC10273620; doi:10.1186/s13227-023-00214-y), 2023-06-16
Supplement: 13227_2023_214_MOESM7_ESM.pdf [file 13227_2023_214_MOESM7_ESM.pdf]

| Gene         | Tissue  | Sp time | Lv time | Relative qPCR |
|--------------|---------|---------|---------|---------------|
| tel          | pmc     | mat     | Mat     | same          |
| tbr          | Pmc     | mat     | mat     | same mat      |
| ets1/2       | pmc     | mat     | mat     | same mat      |
| otxa         | pmc     | mat     | mat     | same          |
| wnt8         | pmc     | 5       | 6       | same 6        |
| Wnt1         | pmc     | 10      | 10      | same          |
| Alx1         | pmc     | 6       | 8       | same          |
| FoxN2/3      | pmc     | 9       | 10      | same          |
| delta        | pmc     | 9       | 6       | Lv early      |
| erg          | pmc     | 10      | 10      | same          |
| dri          | pmc     | 10      | 12      | same          |
| tgif         | pmc     | 16      | 14      | same          |
| snail        | pmc     | 19      | 14      | Lv early      |
| FoxO         | pmc     | 18      | 20      | same          |
| FoxB         | pmc     | 18      | 20      | same 22       |
| Pmar1        | pmc     | 6       | 6       | same          |
| otxa         | endomes | mat     | mat     | same          |
| soxB1        | endomes | mat     | mat     | same mat      |
| beta catenin | endomes | mat     | mat     | same          |
| Eve          | endomes | 6       | 8       | same 6        |
| blimp1b      | endomes | mat-8   | mat-10  | same          |
| hox11/13b    | endomes | 9       | 10      | same          |
| Notch        | endomes | mat     | mat     | same          |
| Tcf          | endomes | mat     | mat     | same          |
| gatae        | endomes | 13      | 14      | same          |
| FoxA         | endomes | 10      | 12      | same 10       |
| Wnt16        | endomes | mat     | mat     | same          |

|          |          |        |        |          |
|----------|----------|--------|--------|----------|
| hesC     | endmes   | 7      | mat    | Lv early |
| FoxY     | endomes  | 10     | 16     | Lv late  |
| not      | ecto mes | 9      | 10     | same 10  |
| ese      | mes      | 9      | 10     | same     |
| prox     | mes      | mat-16 | mat-14 | same     |
| six1/2   | mes      | 19     | 20     | same     |
| runx     | mes      | 10     | 10     | same     |
| gatac    | mes      | 18     | 16     | same 14  |
| scl      | mes      | 20     | 16     | Lv early |
| hex      | mes      | 10     | 6      | Lv early |
| erg      | mes      | 9      | 10     | same     |
| gcm      | mes      | 9      | 10     | same 10  |
| endo16   | endo     | 14     | 20     | Lv late  |
| brn1/2/4 | endo     | mat    | mat    | same     |
| Bra      | endo     | 13     | 12     | same     |
| myc      | endo     | 13     | 20     | Lv late  |
| Hh       | endo     | 22     | 22     | same     |
| hnf1     | endo     | 17     | 16     | same     |
| Krl      | endo     | 6      | 18     | Lv late  |
| hif1a    | ectoderm | 17     | 18     | same     |
| tbx2/3   | ectoderm | 16     | 12     | Lv early |
| hmx      | ectoderm | 12     | 10     | same     |
| hox7     | ectoderm | 19     | 22     | Lv late  |
| msx      | ectoderm | 18     | 12     | Lv early |
| irxa     | ectoderm | 16     | 16     | same     |
| dlx      | ectoderm | 17     | 18     | same     |
| BMP2/4   | ectoderm | 12     | 6      | lv early |

|              |          |     |     |             |
|--------------|----------|-----|-----|-------------|
| Chordin      | ectoderm | 12  | 10  | same        |
| Dri          | ectoderm | 26  | 22  | Lv early    |
| FoxA         | ectoderm | 11  | 12  | same        |
| FoxG         | ectoderm | 17  | 16  | same        |
| FoxJ1        | ectoderm | 9   | 6   | Lv early    |
| Gsc          | ectoderm | 15  | 8   | lv early 10 |
| Hlf          | ectoderm | mat | mat | same        |
| Lim1         | ectoderm | 12  | 12  | same        |
| Nk1          | ectoderm | 18  | 18  | same        |
| NK2.2        | ectoderm | 10  | 10  | same        |
| Nodal        | ectoderm | 9   | 6   | Lv early 6  |
| Sip1         | ectoderm | mat | mat | Same        |
| ets4         | ectoderm | mat | mat | same        |
| FoxQ2        | ectoderm | 6   | 8   | same        |
| Six3         | ectoderm | 8   | 8   | same        |
| univin       | ectoderm | mat | mat | same        |
| emx          | ectoderm | 10  | 10  | same        |
| pax4l        | ectoderm | mat | mat | same        |
| not          | ectoderm | 10  | 10  | same        |
| lefty        | ectoderm | 9   | 6   | Lv early    |
| vegf3        | ectoderm | 9   | 12  | Lv late     |
| soxb1        | ectoderm | mat | mat | same        |
| wnt5         | ectoderm | 10  | 10  | same        |
| hnf6 -onecut | ectoderm | mat | mat | same mat    |
| bra          | ectoderm | 14  | 14  | same        |
| nk2.1        | ectoderm | 14  | 10  | Lv early    |
|              |          |     |     | 14 early    |
|              |          |     |     | 6 late      |
