# Supplementary material for: Feedback circuits are numerous in embryonic gene regulatory networks and offer a stabilizing influence on evolution of those networks
Source: PubMed Central journal article supplement (PMC10273620; doi:10.1186/s13227-023-00214-y), 2023-06-16
Supplement: 13227_2023_214_MOESM8_ESM.pdf [file 13227_2023_214_MOESM8_ESM.pdf]

| Gene      | Sp first on | Pl x.1.3 | Lv x 2 | Comparison |
|-----------|-------------|----------|--------|------------|
| Wnt8      | 5           | 5.2      | 6      | same       |
| FoxQ2     | 6           | 5.2      | 8      | same       |
| Hox11/13b | 9           | 8.5      | 10     | same       |
| Blimp1b   | 9*          | 8.5      | 10*    | *mat +     |
| Hex       | 11          | 7.8      | 6      | Sp late    |
| Gcm       | 9.8         | 8.5      | 10     | same       |
| Not1      | 10          | 8.5      | 10     | same       |
| Nodal     | 9           | 6.5      | 6      | Sp late    |
| Alx1      | 6           | 8.5      | 8      | same       |
| delta     | 9           | 9.75     | 6      | Lv early   |
| FoxA      | 11          | 11       | 12     | same       |
| BMP2/4    | 12          | 11.7     | 8      | Lv early   |
| Dri       | 10          | 12.6     | 12     | same       |
| VegF3     | 10          | 13.6     | 14     | Sp early   |
| Bra       | 13          | 12.6     | 12     | same       |
| pks1      | 13          | 14.3     | 16     | Lv late    |
| gataE     | 13          | 14.3     | 14     | same       |
| tbx2/3    | 17          | 16.9     | 12     | Lv early   |
| irxa      | 16          | 18.2     | 16     | Pl late    |
| dlx       | 17          | 18.8     | 18     | same       |
| msx       | 18          | 20.1     | 12     | Lv early   |
| six1/2    | 20          | 24.7     | 20     | Pl late    |
