# Supplementary material for: Feedback circuits are numerous in embryonic gene regulatory networks and offer a stabilizing influence on evolution of those networks
Source: PubMed Central journal article supplement (PMC10273620; doi:10.1186/s13227-023-00214-y), 2023-06-16
Supplement: 13227_2023_214_MOESM9_ESM.pdf [file 13227_2023_214_MOESM9_ESM.pdf]

|            | Lineage  | #  | Total | Positive | Negative |
|------------|----------|----|-------|----------|----------|
| Sp classic | Endoderm | 7  |       | 4        | 3        |
|            | Mesoderm | 7  |       | 6        | 1        |
|            | PMC      | 5  |       | 4        | 1        |
|            | Ectoderm | 5  |       | 3        | 2        |
|            |          | 24 |       | 71%      | 29%      |
| Sp timing  | Endoderm | 10 |       | 6        | 4        |
|            | Mesoderm | 14 |       | 10       | 4        |
|            | PMC      | 7  |       | 6        | 1        |
|            | Ectoderm | 13 |       | 9        | 4        |
|            |          | 44 |       | 70%      | 30%      |
| Lv timing  | Endoderm | 9  |       | 5        | 4        |
|            | Mesoderm | 13 |       | 11       | 2        |
|            | PMC      | 10 |       | 8        | 2        |
|            | Ectoderm | 18 |       | 12       | 6        |
|            |          | 50 |       | 72%      | 28%      |
